# Supplementary material
Source: publisher site journal article supplement (https://www.dovepress.com/article/428709)
Supplement: Supplementary file 1 [file get_supplementary_file.php]

Supplementary Table 1: GSEA analysis of MMP9

| ONTOLOGY | ID         | Description                                  | NES      | p. adjust |
|----------|------------|----------------------------------------------|----------|-----------|
| CC       | G0:0000313 | organellar ribosome                          | -3.1418  | 1.83E-08  |
| CC       | G0:0000315 | organellar large ribosomal subunit           | -2.88566 | 1.83E-08  |
| BP       | G0:0002181 | cytoplasmic translation                      | -2.57005 | 1.83E-08  |
| MF       | G0:0003735 | structural constituent of ribosome           | -3.18548 | 1.83E-08  |
| MF       | G0:0004672 | protein kinase activity                      | 1.871607 | 1.83E-08  |
| CC       | G0:0005743 | mitochondrial inner membrane                 | -2.84039 | 1.83E-08  |
| CC       | G0:0005759 | mitochondrial matrix                         | -2.95753 | 1.83E-08  |
| CC       | G0:0005761 | mitochondrial ribosome                       | -3.1418  | 1.83E-08  |
| CC       | G0:0005762 | mitochondrial large ribosomal subunit        | -2.88566 | 1.83E-08  |
| CC       | G0:0005766 | primary lysosome                             | 2.393632 | 1.83E-08  |
| CC       | G0:0005840 | ribosome                                     | -3.13584 | 1.83E-08  |
| BP       | G0:0006364 | rRNA processing                              | -2.90774 | 1.83E-08  |
| BP       | G0:0006399 | tRNA metabolic process                       | -2.60846 | 1.83E-08  |
| BP       | G0:0006400 | tRNA modification                            | -2.55163 | 1.83E-08  |
| BP       | G0:0006412 | translation                                  | -2.34153 | 1.83E-08  |
| BP       | G0:0008033 | tRNA processing                              | -2.59288 | 1.83E-08  |
| BP       | G0:0009451 | RNA modification                             | -2.42086 | 1.83E-08  |
| CC       | G0:0015934 | large ribosomal subunit                      | -3.02732 | 1.83E-08  |
| CC       | G0:0015935 | small ribosomal subunit                      | -2.88537 | 1.83E-08  |
| BP       | G0:0016072 | rRNA metabolic process                       | -2.86455 | 1.83E-08  |
| MF       | G0:0019843 | rRNA binding                                 | -2.71656 | 1.83E-08  |
| CC       | G0:0019866 | organelle inner membrane                     | -2.63897 | 1.83E-08  |
| BP       | G0:0022613 | ribonucleoprotein complex biogenesis         | -2.76941 | 1.83E-08  |
| CC       | G0:0022626 | cytosolic ribosome                           | -2.6595  | 1.83E-08  |
| CC       | G0:0030667 | secretory granule membrane                   | 2.663124 | 1.83E-08  |
| CC       | G0:0030684 | preribosome                                  | -2.73745 | 1.83E-08  |
| BP       | G0:0032543 | mitochondrial translation                    | -2.68829 | 1.83E-08  |
| BP       | G0:0034470 | ncRNA processing                             | -2.90632 | 1.83E-08  |
| BP       | G0:0034660 | ncRNA metabolic process                      | -2.79547 | 1.83E-08  |
| CC       | G0:0035579 | specific granule membrane                    | 2.602711 | 1.83E-08  |
| BP       | G0:0042254 | ribosome biogenesis                          | -2.89679 | 1.83E-08  |
| BP       | G0:0042273 | ribosomal large subunit biogenesis           | -2.59149 | 1.83E-08  |
| CC       | G0:0042581 | specific granule                             | 2.840897 | 1.83E-08  |
| CC       | G0:0042582 | azurophil granule                            | 2.393632 | 1.83E-08  |
| CC       | G0:0044391 | ribosomal subunit                            | -3.25617 | 1.83E-08  |
| CC       | G0:0070820 | tertiary granule                             | 2.716115 | 1.83E-08  |
| CC       | G0:0098798 | mitochondrial protein-containing complex     | -3.13504 | 1.83E-08  |
| CC       | G0:0098800 | inner mitochondrial membrane protein complex | -2.53824 | 1.83E-08  |
| BP       | G0:0140053 | mitochondrial gene expression                | -2.72961 | 1.83E-08  |
| MF       | G0:0140098 | catalytic activity, acting on RNA            | -2.30829 | 1.83E-08  |
| MF       | G0:0140640 | catalytic activity, acting on a nucleic acid | -2.32027 | 1.83E-08  |
| CC       | G0:1904724 | tertiary granule lumen                       | 2.679315 | 1.83E-08  |
| MF       | G0:0004674 | protein serine/threonine kinase activity     | 1.992636 | 2.19E-08  |
| BP       | G0:0006909 | phagocytosis                                 | 2.122914 | 5.05E-08  |
| CC       | G0:0000314 | organellar small ribosomal subunit           | -2.62342 | 5.39E-08  |
| CC       | G0:0005763 | mitochondrial small ribosomal subunit        | -2.62342 | 5.39E-08  |
| BP       | G0:0046777 | protein autophosphorylation                  | 2.065987 | 7.19E-08  |
| CC       | G0:0101002 | ficolin-1-rich granule                       | 2.21615  | 8.21E-08  |
| CC       | G0:0034774 | secretory granule lumen                      | 1.97181  | 9.60E-08  |
| BP       | G0:0060627 | regulation of vesicle-mediated transport     | 1.786017 | 2.30E-07  |
| BP       | G0:0022618 | ribonucleoprotein complex assembly           | -2.20524 | 2.76E-07  |

|    |            |                                                        |          |          |
|----|------------|--------------------------------------------------------|----------|----------|
| BP | G0:0042274 | ribosomal small subunit biogenesis                     | -2.44379 | 2.76E-07 |
| CC | G0:0060205 | cytoplasmic vesicle lumen                              | 1.927211 | 2.78E-07 |
| BP | G0:0042326 | negative regulation of phosphorylation                 | 1.906118 | 2.78E-07 |
| BP | G0:0045936 | negative regulation of phosphate metabolism            | 1.87912  | 3.79E-07 |
| CC | G0:0035580 | specific granule lumen                                 | 2.464857 | 4.72E-07 |
| MF | G0:0140101 | catalytic activity, acting on a tRNA                   | -2.35435 | 5.18E-07 |
| BP | G0:1901137 | carbohydrate derivative biosynthetic process           | -1.76481 | 5.60E-07 |
| BP | G0:0006457 | protein folding                                        | -2.12247 | 5.84E-07 |
| CC | G0:0045335 | phagocytic vesicle                                     | 2.201523 | 5.84E-07 |
| CC | G0:0031983 | vesicle lumen                                          | 1.923364 | 1.06E-06 |
| BP | G0:0010563 | negative regulation of phosphorus metabolism           | 1.866495 | 1.06E-06 |
| CC | G0:0022625 | cytosolic large ribosomal subunit                      | -2.42952 | 1.06E-06 |
| BP | G0:0000045 | autophagosome assembly                                 | 2.385561 | 1.07E-06 |
| BP | G0:0006281 | DNA repair                                             | -1.81816 | 1.27E-06 |
| BP | G0:0071216 | cellular response to biotic stimulus                   | 1.974642 | 1.49E-06 |
| MF | G0:0051082 | unfolded protein binding                               | -2.23475 | 1.59E-06 |
| BP | G0:0042255 | ribosome assembly                                      | -2.42201 | 2.00E-06 |
| BP | G0:0002274 | myeloid leukocyte activation                           | 2.034659 | 2.27E-06 |
| BP | G0:0090305 | nucleic acid phosphodiester bond hydrolysis            | -2.00854 | 2.33E-06 |
| MF | G0:0106310 | protein serine kinase activity                         | 1.845897 | 2.75E-06 |
| BP | G0:0071826 | ribonucleoprotein complex subunit organization         | -2.12902 | 2.93E-06 |
| BP | G0:1905037 | autophagosome organization                             | 2.334594 | 3.16E-06 |
| BP | G0:0055086 | nucleobase-containing small molecule metabolism        | -1.74432 | 3.36E-06 |
| BP | G0:0007033 | vacuole organization                                   | 2.080705 | 3.53E-06 |
| MF | G0:0000049 | tRNA binding                                           | -2.38292 | 4.07E-06 |
| BP | G0:0006520 | cellular amino acid metabolic process                  | -1.97055 | 4.16E-06 |
| CC | G0:0022627 | cytosolic small ribosomal subunit                      | -2.45298 | 4.39E-06 |
| BP | G0:0007015 | actin filament organization                            | 1.762569 | 4.62E-06 |
| MF | G0:0016874 | ligase activity                                        | -2.20518 | 4.76E-06 |
| BP | G0:1990266 | neutrophil migration                                   | 2.169276 | 6.06E-06 |
| BP | G0:0002446 | neutrophil mediated immunity                           | 2.479644 | 6.14E-06 |
| BP | G0:0007005 | mitochondrion organization                             | -1.77852 | 6.14E-06 |
| BP | G0:0010256 | endomembrane system organization                       | 1.756471 | 6.15E-06 |
| MF | G0:0043021 | ribonucleoprotein complex binding                      | -2.13037 | 6.43E-06 |
| BP | G0:0006914 | autophagy                                              | 1.719871 | 6.78E-06 |
| BP | G0:0061919 | process utilizing autophagic mechanism                 | 1.719871 | 6.78E-06 |
| BP | G0:0046112 | nucleobase biosynthetic process                        | -2.3705  | 6.81E-06 |
| CC | G0:0009295 | nucleoid                                               | -2.42565 | 6.92E-06 |
| CC | G0:0042645 | mitochondrial nucleoid                                 | -2.42565 | 6.92E-06 |
| MF | G0:0140097 | catalytic activity, acting on DNA                      | -1.98105 | 6.93E-06 |
| BP | G0:0045333 | cellular respiration                                   | -2.00286 | 7.99E-06 |
| MF | G0:0051536 | iron-sulfur cluster binding                            | -2.28786 | 8.18E-06 |
| MF | G0:0051540 | metal cluster binding                                  | -2.28786 | 8.18E-06 |
| BP | G0:0030490 | maturation of SSU-rRNA                                 | -2.44406 | 8.28E-06 |
| BP | G0:0046148 | pigment biosynthetic process                           | -2.27535 | 1.17E-05 |
| BP | G0:0000470 | maturation of LSU-rRNA                                 | -2.34581 | 1.20E-05 |
| BP | G0:0000959 | mitochondrial RNA metabolic process                    | -2.40362 | 1.20E-05 |
| BP | G0:0009113 | purine nucleobase biosynthetic process                 | -2.29191 | 1.22E-05 |
| BP | G0:0071900 | regulation of protein serine/threonine kinase activity | 1.76182  | 1.46E-05 |
| BP | G0:1990542 | mitochondrial transmembrane transport                  | -2.21283 | 1.51E-05 |
| BP | G0:0001933 | negative regulation of protein phosphorylation         | 1.824032 | 1.66E-05 |
| BP | G0:0009060 | aerobic respiration                                    | -2.03826 | 1.69E-05 |
| CC | G0:0101003 | ficolin-1-rich granule membrane                        | 2.291021 | 1.83E-05 |
| BP | G0:0018105 | peptidyl-serine phosphorylation                        | 1.79262  | 1.93E-05 |

|    |            |                                                   |          |             |
|----|------------|---------------------------------------------------|----------|-------------|
| BP | G0:0018209 | peptidyl-serine modification                      | 1.795117 | 2.02E-05    |
| BP | G0:0001510 | RNA methylation                                   | -2.29296 | 2.03E-05    |
| BP | G0:0009124 | nucleoside monophosphate biosynthetic process     | -2.35473 | 2.20E-05    |
| CC | G0:0035577 | azurophil granule membrane                        | 2.300048 | 2.20E-05    |
| BP | G0:0042119 | neutrophil activation                             | 2.411261 | 2.21E-05    |
| CC | G0:0030670 | phagocytic vesicle membrane                       | 2.231986 | 2.49E-05    |
| BP | G0:0043405 | regulation of MAP kinase activity                 | 1.963448 | 2.51E-05    |
| BP | G0:0030335 | positive regulation of cell migration             | 1.652308 | 2.53E-05    |
| BP | G0:0019221 | cytokine-mediated signaling pathway               | 1.681346 | 2.98E-05    |
| BP | G0:0006887 | exocytosis                                        | 1.747649 | 3.06E-05    |
| MF | G0:0004518 | nuclease activity                                 | -1.94278 | 3.26E-05    |
| MF | G0:0003779 | actin binding                                     | 1.694688 | 3.26E-05    |
| BP | G0:0050900 | leukocyte migration                               | 1.736761 | 3.41E-05    |
| BP | G0:0097530 | granulocyte migration                             | 2.034757 | 3.41E-05    |
| CC | G0:0070821 | tertiary granule membrane                         | 2.271012 | 3.43E-05    |
| BP | G0:0036230 | granulocyte activation                            | 2.364487 | 3.43E-05    |
| BP | G0:0008154 | actin polymerization or depolymerization          | 1.924532 | 3.47E-05    |
| CC | G0:0031252 | cell leading edge                                 | 1.714834 | 3.63E-05    |
| BP | G0:0009123 | nucleoside monophosphate metabolic process        | -2.22289 | 3.86E-05    |
| MF | G0:0051539 | 4 iron, 4 sulfur cluster binding                  | -2.35679 | 3.96E-05    |
| CC | G0:0032040 | small-subunit processome                          | -2.34272 | 4.37E-05    |
| BP | G0:0043254 | regulation of protein-containing complex          | 1.733563 | 4.76E-05    |
| MF | G0:0016741 | transferase activity, transferring one-carbon     | -1.99152 | 4.88E-05    |
| MF | G0:0035325 | Toll-like receptor binding                        | 2.265701 | 5.93E-05    |
| BP | G0:0072522 | purine-containing compound biosynthetic process   | -1.98431 | 6.21E-05    |
| MF | G0:0008173 | RNA methyltransferase activity                    | -2.30187 | 6.25E-05    |
| BP | G0:1901293 | nucleoside phosphate biosynthetic process         | -1.84922 | 6.67E-05    |
| BP | G0:0071219 | cellular response to molecule of bacterial origin | 1.890053 | 6.67E-05    |
| BP | G0:0030488 | tRNA methylation                                  | -2.31278 | 6.67E-05    |
| BP | G0:0009156 | ribonucleoside monophosphate biosynthetic process | -2.30082 | 7.27E-05    |
| CC | G0:0005770 | late endosome                                     | 1.798062 | 8.46E-05    |
| BP | G0:0040017 | positive regulation of locomotion                 | 1.608126 | 8.46E-05    |
| BP | G0:0042742 | defense response to bacterium                     | 1.784606 | 8.46E-05    |
| CC | G0:0030139 | endocytic vesicle                                 | 1.734837 | 8.46E-05    |
| BP | G0:0030041 | actin filament polymerization                     | 1.916477 | 8.46E-05    |
| CC | G0:0016605 | PML body                                          | 2.023992 | 9.32E-05    |
| BP | G0:0009117 | nucleotide metabolic process                      | -1.66825 | 9.32E-05    |
| BP | G0:0030099 | myeloid cell differentiation                      | 1.702287 | 9.67E-05    |
| BP | G0:0043410 | positive regulation of MAPK cascade               | 1.646829 | 9.67E-05    |
| BP | G0:0072521 | purine-containing compound metabolic process      | -1.72021 | 0.00010071  |
| CC | G0:0005746 | mitochondrial respirasome                         | -2.09924 | 0.00010071  |
| BP | G0:0046390 | ribose phosphate biosynthetic process             | -1.91324 | 0.000100841 |
| BP | G0:0009165 | nucleotide biosynthetic process                   | -1.86506 | 0.000106691 |
| BP | G0:0006839 | mitochondrial transport                           | -1.85683 | 0.000107001 |
| BP | G0:0044089 | positive regulation of cellular component         | 1.630238 | 0.000107001 |
| BP | G0:0006260 | DNA replication                                   | -1.77913 | 0.000107536 |
| BP | G0:0002532 | production of molecular mediator involved in      | 2.124073 | 0.000107536 |
| BP | G0:0006164 | purine nucleotide biosynthetic process            | -1.91672 | 0.000110871 |
| BP | G0:0002237 | response to molecule of bacterial origin          | 1.714438 | 0.000119917 |
| BP | G0:0016050 | vesicle organization                              | 1.731629 | 0.000119917 |
| BP | G0:0009260 | ribonucleotide biosynthetic process               | -1.90155 | 0.000120154 |
| BP | G0:1901605 | alpha-amino acid metabolic process                | -1.91086 | 0.000120196 |
| BP | G0:0032496 | response to lipopolysaccharide                    | 1.69291  | 0.000124116 |
| BP | G0:0051272 | positive regulation of cellular component         | 1.58033  | 0.000127486 |

|    |            |                                                          |          |             |
|----|------------|----------------------------------------------------------|----------|-------------|
| BP | G0:0016236 | macroautophagy                                           | 1.753427 | 0.000127486 |
| BP | G0:0043068 | positive regulation of programmed cell death             | 1.586073 | 0.000128526 |
| MF | G0:0004527 | exonuclease activity                                     | -2.14053 | 0.000128526 |
| BP | G0:2000147 | positive regulation of cell motility                     | 1.59485  | 0.000131088 |
| CC | G0:0030686 | 90S preribosome                                          | -2.29809 | 0.000134131 |
| MF | G0:0035091 | phosphatidylinositol binding                             | 1.758232 | 0.000140388 |
| BP | G0:0002221 | pattern recognition receptor signaling pathway           | 1.905224 | 0.000140486 |
| BP | G0:0045055 | regulated exocytosis                                     | 1.792633 | 0.000142502 |
| CC | G0:0005758 | mitochondrial intermembrane space                        | -2.06051 | 0.000148467 |
| BP | G0:0006753 | nucleoside phosphate metabolic process                   | -1.66279 | 0.000158467 |
| CC | G0:0005769 | early endosome                                           | 1.657843 | 0.000158467 |
| BP | G0:0042773 | ATP synthesis coupled electron transport                 | -2.07792 | 0.000164162 |
| BP | G0:0042775 | mitochondrial ATP synthesis coupled electron transport   | -2.07792 | 0.000164162 |
| BP | G0:0002283 | neutrophil activation involved in immune response        | 2.275753 | 0.000166065 |
| BP | G0:0051640 | organelle localization                                   | 1.601088 | 0.00016959  |
| CC | G0:0015629 | actin cytoskeleton                                       | 1.606263 | 0.00016959  |
| BP | G0:0030593 | neutrophil chemotaxis                                    | 2.05764  | 0.000170516 |
| BP | G0:0070302 | regulation of stress-activated protein kinase activity   | 1.840013 | 0.000178633 |
| MF | G0:0090079 | translation regulator activity, nucleic acid dependent   | -2.03317 | 0.000183608 |
| MF | G0:0005543 | phospholipid binding                                     | 1.616037 | 0.000184651 |
| BP | G0:0002377 | immunoglobulin production                                | -1.95221 | 0.000184651 |
| BP | G0:0071621 | granulocyte chemotaxis                                   | 1.981826 | 0.000184651 |
| BP | G0:0009161 | ribonucleoside monophosphate metabolic process           | -2.12587 | 0.000184651 |
| BP | G0:0002224 | toll-like receptor signaling pathway                     | 1.96239  | 0.000184651 |
| BP | G0:0051493 | regulation of cytoskeleton organization                  | 1.612013 | 0.000192814 |
| BP | G0:1902532 | negative regulation of intracellular signaling           | 1.622039 | 0.000203436 |
| CC | G0:0098803 | respiratory chain complex                                | -2.03281 | 0.000224332 |
| CC | G0:0070469 | respirasome                                              | -2.05887 | 0.000235171 |
| BP | G0:1902903 | regulation of supramolecular fiber organization          | 1.661111 | 0.00023906  |
| BP | G0:1903530 | regulation of secretion by cell                          | 1.52351  | 0.000241366 |
| BP | G0:0050732 | negative regulation of peptidyl-tyrosine phosphorylation | 2.154891 | 0.000255704 |
| CC | G0:0031301 | integral component of organelle membrane                 | -1.69638 | 0.000264241 |
| BP | G0:0072593 | reactive oxygen species metabolic process                | 1.75586  | 0.000281813 |
| CC | G0:0000228 | nuclear chromosome                                       | -1.85104 | 0.000281813 |
| BP | G0:0033108 | mitochondrial respiratory chain complex assembly         | -2.12035 | 0.000281813 |
| BP | G0:0006403 | RNA localization                                         | -1.84891 | 0.000286677 |
| BP | G0:0032635 | interleukin-6 production                                 | 1.929065 | 0.000286677 |
| BP | G0:0032675 | regulation of interleukin-6 production                   | 1.929065 | 0.000286677 |
| BP | G0:0000462 | maturation of SSU-rRNA from tricistronic transcript      | -2.20481 | 0.000297188 |
| MF | G0:0008168 | methyltransferase activity                               | -1.90881 | 0.000317218 |
| MF | G0:0051087 | chaperone binding                                        | -1.99369 | 0.000322237 |
| BP | G0:0043312 | neutrophil degranulation                                 | 2.165933 | 0.000327149 |
| BP | G0:0090501 | RNA phosphodiester bond hydrolysis                       | -1.94107 | 0.000327149 |
| BP | G0:0000154 | rRNA modification                                        | -2.20699 | 0.000333476 |
| BP | G0:0006310 | DNA recombination                                        | -1.76934 | 0.000334243 |
| CC | G0:0005742 | mitochondrial outer membrane translocase                 | -2.18888 | 0.000341251 |
| BP | G0:0019646 | aerobic electron transport chain                         | -2.05857 | 0.000341251 |
| CC | G0:0005776 | autophagosome                                            | 2.020098 | 0.000341251 |
| BP | G0:0002381 | immunoglobulin production involved in immune response    | -2.04729 | 0.000350363 |
| MF | G0:0023023 | MHC protein complex binding                              | -2.19561 | 0.000351993 |
| BP | G0:0006284 | base-excision repair                                     | -2.15655 | 0.000351993 |
| CC | G0:0030427 | site of polarized growth                                 | 1.830076 | 0.000354264 |
| BP | G0:0097529 | myeloid leukocyte migration                              | 1.791869 | 0.000357239 |
| BP | G0:1904874 | positive regulation of telomerase RNA localization       | -2.24232 | 0.000357239 |

|    |            |                                                                  |          |             |
|----|------------|------------------------------------------------------------------|----------|-------------|
| BP | G0:0006911 | phagocytosis, engulfment                                         | 2.155477 | 0.000361506 |
| BP | G0:0050727 | regulation of inflammatory response                              | 1.652319 | 0.000361506 |
| BP | G0:0071222 | cellular response to lipopolysaccharide                          | 1.829448 | 0.000361745 |
| BP | G0:0031400 | negative regulation of protein modification                      | 1.586024 | 0.000370282 |
| BP | G0:0062208 | positive regulation of pattern recognition                       | 2.222234 | 0.000371326 |
| BP | G0:1903305 | regulation of regulated secretory pathway                        | 1.866149 | 0.000373417 |
| CC | G0:0032592 | integral component of mitochondrial membrane                     | -2.02651 | 0.000384107 |
| BP | G0:1901607 | alpha-amino acid biosynthetic process                            | -2.04645 | 0.000403421 |
| BP | G0:0072350 | tricarboxylic acid metabolic process                             | -2.17537 | 0.000403421 |
| BP | G0:0006626 | protein targeting to mitochondrion                               | -1.9986  | 0.000405453 |
| BP | G0:0017157 | regulation of exocytosis                                         | 1.755863 | 0.000405453 |
| BP | G0:0030833 | regulation of actin filament polymerization                      | 1.803277 | 0.00040564  |
| BP | G0:0031065 | positive regulation of histone deacetylation                     | 2.231854 | 0.000417864 |
| MF | G0:0140297 | DNA-binding transcription factor binding                         | 1.595936 | 0.000432666 |
| CC | G0:0031970 | organelle envelope lumen                                         | -1.97771 | 0.000436548 |
| BP | G0:0006144 | purine nucleobase metabolic process                              | -2.16115 | 0.000455229 |
| BP | G0:1904816 | positive regulation of protein localization                      | -2.19841 | 0.000464997 |
| CC | G0:0010008 | endosome membrane                                                | 1.563324 | 0.000471234 |
| BP | G0:0099024 | plasma membrane invagination                                     | 2.067718 | 0.000473783 |
| BP | G0:0022900 | electron transport chain                                         | -1.84299 | 0.000473783 |
| BP | G0:0002764 | immune response-regulating signaling pathway                     | 1.584815 | 0.000482468 |
| BP | G0:0009126 | purine nucleoside monophosphate metabolic process                | -2.16753 | 0.000489151 |
| BP | G0:0060326 | cell chemotaxis                                                  | 1.671592 | 0.000498435 |
| BP | G0:0043299 | leukocyte degranulation                                          | 2.055039 | 0.000500777 |
| BP | G0:0052547 | regulation of peptidase activity                                 | 1.550773 | 0.000505751 |
| BP | G0:2000377 | regulation of reactive oxygen species metabolism                 | 1.817386 | 0.000507005 |
| BP | G0:0019693 | ribose phosphate metabolic process                               | -1.64101 | 0.000508803 |
| BP | G0:0070129 | regulation of mitochondrial translation                          | -2.1515  | 0.000513272 |
| BP | G0:0032103 | positive regulation of response to external stimulus             | 1.596006 | 0.000513272 |
| BP | G0:0006163 | purine nucleotide metabolic process                              | -1.64324 | 0.000518196 |
| CC | G0:0101031 | chaperone complex                                                | -2.16118 | 0.000525588 |
| MF | G0:0004386 | helicase activity                                                | -1.85546 | 0.000525588 |
| BP | G0:0051258 | protein polymerization                                           | 1.701905 | 0.000525588 |
| MF | G0:0003954 | NADH dehydrogenase activity                                      | -2.15471 | 0.000525588 |
| BP | G0:0016311 | dephosphorylation                                                | 1.598829 | 0.000525588 |
| BP | G0:2000379 | positive regulation of reactive oxygen species metabolism        | 2.048182 | 0.000534345 |
| BP | G0:0051091 | positive regulation of DNA-binding transcription factor activity | 1.690464 | 0.0005579   |
| BP | G0:0070585 | protein localization to mitochondrion                            | -1.91042 | 0.000565594 |
| BP | G0:0032535 | regulation of cellular component size                            | 1.592451 | 0.000577582 |
| CC | G0:1904813 | ficolin-1-rich granule lumen                                     | 1.868146 | 0.000577582 |
| BP | G0:0022904 | respiratory electron transport chain                             | -1.96687 | 0.000588843 |
| BP | G0:0044283 | small molecule biosynthetic process                              | -1.55233 | 0.000588843 |
| CC | G0:0030426 | growth cone                                                      | 1.79668  | 0.000600155 |
| BP | G0:0090066 | regulation of anatomical structure size                          | 1.524567 | 0.000606828 |
| BP | G0:0070498 | interleukin-1-mediated signaling pathway                         | 2.199569 | 0.000613881 |
| BP | G0:0050863 | regulation of T cell activation                                  | -1.64588 | 0.000650266 |
| BP | G0:1901657 | glycosyl compound metabolic process                              | -1.9441  | 0.000663448 |
| MF | G0:0008757 | S-adenosylmethionine-dependent methyltransferase activity        | -1.94673 | 0.00067837  |
| BP | G0:0032956 | regulation of actin cytoskeleton organization                    | 1.625678 | 0.000683448 |
| BP | G0:0002444 | myeloid leukocyte mediated immunity                              | 1.90032  | 0.000715411 |
| BP | G0:0031098 | stress-activated protein kinase signaling pathway                | 1.698542 | 0.00071783  |
| MF | G0:0004722 | protein serine/threonine phosphatase activity                    | 1.915231 | 0.000720059 |
| BP | G0:0045088 | regulation of innate immune response                             | 1.728427 | 0.000724406 |
| BP | G0:0042554 | superoxide anion generation                                      | 2.126683 | 0.000724406 |

|    |            |                                                                 |          |             |
|----|------------|-----------------------------------------------------------------|----------|-------------|
| BP | GO:0006790 | sulfur compound metabolic process                               | -1.64249 | 0.000728806 |
| BP | GO:2000785 | regulation of autophagosome assembly                            | 2.136051 | 0.000731777 |
| BP | GO:0002534 | cytokine production involved in inflammation                    | 2.051225 | 0.000734741 |
| BP | GO:1900015 | regulation of cytokine production involved in inflammation      | 2.051225 | 0.000734741 |
| BP | GO:0038127 | ERBB signaling pathway                                          | 1.864189 | 0.00073635  |
| MF | GO:0015453 | oxidoreduction-driven active transmembrane transport            | -2.05102 | 0.000778933 |
| BP | GO:0000469 | cleavage involved in rRNA processing                            | -2.14495 | 0.000781418 |
| BP | GO:0010257 | NADH dehydrogenase complex assembly                             | -2.13326 | 0.000781745 |
| BP | GO:0032981 | mitochondrial respiratory chain complex I                       | -2.13326 | 0.000781745 |
| BP | GO:0110053 | regulation of actin filament organization                       | 1.696039 | 0.000788225 |
| BP | GO:0052548 | regulation of endopeptidase activity                            | 1.584602 | 0.00080212  |
| BP | GO:0000387 | spliceosomal snRNP assembly                                     | -2.14704 | 0.00080212  |
| MF | GO:0050136 | NADH dehydrogenase (quinone) activity                           | -2.13427 | 0.00080212  |
| BP | GO:0043065 | positive regulation of apoptotic process                        | 1.511577 | 0.000813095 |
| BP | GO:0072655 | establishment of protein localization to organelle              | -1.90996 | 0.000813095 |
| MF | GO:0009055 | electron transfer activity                                      | -1.88745 | 0.000813095 |
| BP | GO:0032271 | regulation of protein polymerization                            | 1.730935 | 0.000828504 |
| BP | GO:0051014 | actin filament severing                                         | 2.184756 | 0.000828504 |
| BP | GO:0042440 | pigment metabolic process                                       | -1.96327 | 0.000847876 |
| CC | GO:0030687 | preribosome, large subunit precursor                            | -2.13195 | 0.000878973 |
| BP | GO:0006261 | DNA-dependent DNA replication                                   | -1.89102 | 0.000885436 |
| BP | GO:0051403 | stress-activated MAPK cascade                                   | 1.678204 | 0.000886424 |
| BP | GO:0006220 | pyrimidine nucleotide metabolic process                         | -2.10549 | 0.000886424 |
| CC | GO:0031968 | organelle outer membrane                                        | -1.73733 | 0.000886424 |
| BP | GO:0030595 | leukocyte chemotaxis                                            | 1.72289  | 0.000901448 |
| BP | GO:0006541 | glutamine metabolic process                                     | -2.16216 | 0.000915726 |
| MF | GO:0016860 | intramolecular oxidoreductase activity                          | -2.0956  | 0.000915726 |
| BP | GO:0043407 | negative regulation of MAP kinase activity                      | 2.042072 | 0.000929034 |
| BP | GO:0009620 | response to fungus                                              | 2.068812 | 0.000929034 |
| BP | GO:0071375 | cellular response to peptide hormone stimulation                | 1.646802 | 0.000929034 |
| BP | GO:0006470 | protein dephosphorylation                                       | 1.629801 | 0.000929034 |
| CC | GO:0019867 | outer membrane                                                  | -1.75259 | 0.000930425 |
| BP | GO:0050852 | T cell receptor signaling pathway                               | -1.88791 | 0.00094786  |
| BP | GO:0032970 | regulation of actin filament-based process                      | 1.572893 | 0.000958495 |
| BP | GO:0009595 | detection of biotic stimulus                                    | 2.102982 | 0.000994566 |
| BP | GO:0050851 | antigen receptor-mediated signaling pathway                     | -1.73382 | 0.001060304 |
| CC | GO:0005741 | mitochondrial outer membrane                                    | -1.76417 | 0.001080221 |
| BP | GO:0002440 | production of molecular mediator of immune response             | -1.71911 | 0.001086847 |
| BP | GO:0000963 | mitochondrial RNA processing                                    | -2.11647 | 0.001125725 |
| CC | GO:0098573 | intrinsic component of mitochondrial membrane                   | -1.96961 | 0.001125725 |
| CC | GO:0098799 | outer mitochondrial membrane protein complex                    | -2.11535 | 0.001149407 |
| BP | GO:0006221 | pyrimidine nucleotide biosynthetic process                      | -2.1322  | 0.00115951  |
| BP | GO:0031334 | positive regulation of protein-containing complex assembly      | 1.699337 | 0.001166465 |
| BP | GO:0009127 | purine nucleoside monophosphate biosynthesis                    | -2.14702 | 0.001180605 |
| BP | GO:0050870 | positive regulation of T cell activation                        | -1.70423 | 0.001190904 |
| CC | GO:0120114 | Sm-like protein family complex                                  | -1.93602 | 0.00119644  |
| BP | GO:0010324 | membrane invagination                                           | 2.026608 | 0.001210904 |
| BP | GO:0043087 | regulation of GTPase activity                                   | 1.594849 | 0.001227463 |
| BP | GO:1904814 | regulation of protein localization to chromosome                | -2.16267 | 0.001227641 |
| BP | GO:0062207 | regulation of pattern recognition receptor activity             | 1.938823 | 0.001244572 |
| BP | GO:0009152 | purine ribonucleotide biosynthetic process                      | -1.78949 | 0.001259931 |
| BP | GO:0009611 | response to wounding                                            | 1.481949 | 0.001259931 |
| BP | GO:0002275 | myeloid cell activation involved in immune response             | 1.922473 | 0.001265913 |
| BP | GO:0071901 | negative regulation of protein serine/threonine phosphorylation | 1.819186 | 0.001279169 |

|    |            |                                                |          |             |
|----|------------|------------------------------------------------|----------|-------------|
| BP | G0:0016197 | endosomal transport                            | 1.711728 | 0.001299564 |
| BP | G0:0050804 | modulation of chemical synaptic transmission   | 1.526537 | 0.001299564 |
| BP | G0:0099177 | regulation of trans-synaptic signaling         | 1.526537 | 0.001299564 |
| CC | G0:0035578 | azurophil granule lumen                        | 1.914455 | 0.001299564 |
| BP | G0:0032872 | regulation of stress-activated MAPK cascade    | 1.762975 | 0.001306362 |
| BP | G0:0018210 | peptidyl-threonine modification                | 1.824757 | 0.001309456 |
| MF | G0:0050135 | NAD(P)+ nucleosidase activity                  | 2.149477 | 0.001321361 |
| MF | G0:0061809 | NAD+ nucleotidase, cyclic ADP-ribose generated | 2.149477 | 0.001321361 |
| BP | G0:1902563 | regulation of neutrophil activation            | 2.082041 | 0.001334668 |
| BP | G0:0070431 | nucleotide-binding oligomerization domain      | 2.101336 | 0.001334668 |
| BP | G0:0033673 | negative regulation of kinase activity         | 1.690798 | 0.001334668 |
| CC | G0:0045121 | membrane raft                                  | 1.578364 | 0.00134416  |
| CC | G0:0098857 | membrane microdomain                           | 1.578364 | 0.00134416  |
| CC | G0:0005774 | vacuolar membrane                              | 1.576053 | 0.001351193 |
| BP | G0:0031663 | lipopolysaccharide-mediated signaling pathway  | 1.971801 | 0.001395624 |
| MF | G0:0016655 | oxidoreductase activity, acting on NAD(P)-     | -2.01887 | 0.001464406 |
| BP | G0:0070525 | tRNA threonylcarbamoyladenosine metabolic      | -2.09001 | 0.001522279 |
| CC | G0:0005767 | secondary lysosome                             | 2.116527 | 0.001526447 |
| BP | G0:0090670 | RNA localization to Cajal body                 | -2.09496 | 0.001526447 |
| BP | G0:0090671 | telomerase RNA localization to Cajal body      | -2.09496 | 0.001526447 |
| BP | G0:0090672 | telomerase RNA localization                    | -2.09496 | 0.001526447 |
| BP | G0:0090685 | RNA localization to nucleus                    | -2.09496 | 0.001526447 |
| BP | G0:1904872 | regulation of telomerase RNA localization      | -2.09496 | 0.001526447 |
| CC | G0:0005925 | focal adhesion                                 | 1.520852 | 0.001532652 |
| BP | G0:0030832 | regulation of actin filament length            | 1.75267  | 0.001532652 |
| BP | G0:0009067 | aspartate family amino acid biosynthetic       | -2.11969 | 0.001532652 |
| MF | G0:0016614 | oxidoreductase activity, acting on CH-OH       | -1.75726 | 0.001570712 |
| BP | G0:0008064 | regulation of actin polymerization or depoly   | 1.775403 | 0.001648776 |
| CC | G0:0042575 | DNA polymerase complex                         | -2.07391 | 0.001672345 |
| BP | G0:0051092 | positive regulation of NF-kappaB transcription | 1.730777 | 0.001676175 |
| BP | G0:1903039 | positive regulation of leukocyte cell-cell     | -1.62553 | 0.001706348 |
| MF | G0:0008408 | 3'-5' exonuclease activity                     | -2.0353  | 0.001709321 |
| MF | G0:0051020 | GTPase binding                                 | 1.593732 | 0.001717655 |
| MF | G0:0008137 | NADH dehydrogenase (ubiquinone) activity       | -2.0685  | 0.001721622 |
| MF | G0:0008135 | translation factor activity, RNA binding       | -1.95115 | 0.001805121 |
| BP | G0:0031349 | positive regulation of defense response        | 1.597226 | 0.001835818 |
| BP | G0:0000723 | telomere maintenance                           | -1.80061 | 0.001845028 |
| BP | G0:0032637 | interleukin-8 production                       | 1.895059 | 0.001906039 |
| BP | G0:0006469 | negative regulation of protein kinase acti     | 1.65904  | 0.001939927 |
| BP | G0:0009167 | purine ribonucleoside monophosphate meta       | -2.08569 | 0.001942535 |
| BP | G0:0034134 | toll-like receptor 2 signaling pathway         | 2.117138 | 0.001972598 |
| MF | G0:0031267 | small GTPase binding                           | 1.609863 | 0.001997547 |
| BP | G0:0007173 | epidermal growth factor receptor signaling     | 1.806624 | 0.002024544 |
| BP | G0:0002218 | activation of innate immune response           | 1.99227  | 0.002025172 |
| BP | G0:0033674 | positive regulation of kinase activity         | 1.499417 | 0.002052033 |
| BP | G0:0006091 | generation of precursor metabolites and c      | -1.53805 | 0.00207858  |
| BP | G0:0000027 | ribosomal large subunit assembly               | -2.12275 | 0.002089502 |
| BP | G0:0044743 | protein transmembrane import into intrace      | -2.08087 | 0.002101774 |
| MF | G0:0017069 | snRNA binding                                  | -2.04004 | 0.002101774 |
| BP | G0:0034135 | regulation of toll-like receptor 2 signal      | 2.044908 | 0.002105417 |
| MF | G0:0004721 | phosphoprotein phosphatase activity            | 1.680964 | 0.002117068 |
| BP | G0:0009259 | ribonucleotide metabolic process               | -1.60107 | 0.002135449 |
| BP | G0:0046328 | regulation of JNK cascade                      | 1.730048 | 0.002135759 |
| BP | G0:0006271 | DNA strand elongation involved in DNA repl     | -2.11708 | 0.00217407  |

|    |            |                                             |          |             |
|----|------------|---------------------------------------------|----------|-------------|
| BP | G0:0015980 | energy derivation by oxidation of organic   | -1.62147 | 0.002181185 |
| BP | G0:0000466 | maturation of 5.8S rRNA from tricistronic   | -2.06946 | 0.002181185 |
| MF | G0:0016791 | phosphatase activity                        | 1.601935 | 0.002258337 |
| CC | G0:0019898 | extrinsic component of membrane             | 1.578597 | 0.002269514 |
| CC | G0:0005666 | RNA polymerase III complex                  | -2.0611  | 0.002276087 |
| CC | G0:0031304 | intrinsic component of mitochondrial inner  | -2.03972 | 0.002281652 |
| CC | G0:0031305 | integral component of mitochondrial inner   | -2.03972 | 0.002281652 |
| MF | G0:0140657 | ATP-dependent activity                      | -1.50468 | 0.002303307 |
| BP | G0:0002755 | MyD88-dependent toll-like receptor signal   | 2.12604  | 0.002310194 |
| BP | G0:0000272 | polysaccharide catabolic process            | 2.082381 | 0.002310194 |
| CC | G0:0031300 | intrinsic component of organelle membrane   | -1.59215 | 0.002310442 |
| BP | G0:0045862 | positive regulation of proteolysis          | 1.549187 | 0.002313741 |
| MF | G0:0061629 | RNA polymerase II-specific DNA-binding tti  | 1.573998 | 0.002332784 |
| BP | G0:0016482 | cytosolic transport                         | 1.774754 | 0.00235148  |
| BP | G0:0072527 | pyrimidine-containing compound metabolic    | -1.8718  | 0.00235148  |
| BP | G0:0044264 | cellular polysaccharide metabolic process   | 1.846007 | 0.002374269 |
| BP | G0:0006119 | oxidative phosphorylation                   | -1.84535 | 0.002408318 |
| BP | G0:0051547 | regulation of keratinocyte migration        | 2.062254 | 0.002426473 |
| MF | G0:0016835 | carbon-oxygen lyase activity                | -1.874   | 0.002455782 |
| BP | G0:1901223 | negative regulation of NIK/NF-kappaB sign   | 2.099684 | 0.002505109 |
| CC | G0:0030027 | lamellipodium                               | 1.654183 | 0.002505109 |
| BP | G0:0051090 | regulation of DNA-binding transcription tti | 1.494517 | 0.00256043  |
| MF | G0:0052650 | NADP-retinol dehydrogenase activity         | -2.10365 | 0.00256043  |
| MF | G0:0016616 | oxidoreductase activity, acting on the Cl   | -1.77108 | 0.00257532  |
| MF | G0:0016779 | nucleotidyltransferase activity             | -1.82944 | 0.002615402 |
| CC | G0:0005657 | replication fork                            | -1.92747 | 0.002629335 |
| BP | G0:0043112 | receptor metabolic process                  | 1.700301 | 0.002658656 |
| BP | G0:0072594 | establishment of protein localization to    | -1.53315 | 0.002698644 |
| CC | G0:0030055 | cell-substrate junction                     | 1.50629  | 0.002708331 |
| BP | G0:0002758 | innate immune response-activating signal    | 2.061946 | 0.002720112 |
| BP | G0:0032757 | positive regulation of interleukin-8 prod   | 1.930916 | 0.002720112 |
| BP | G0:0031123 | RNA 3'-end processing                       | -1.83804 | 0.002763968 |
| CC | G0:0005747 | mitochondrial respiratory chain complex I   | -2.02421 | 0.002763968 |
| CC | G0:0030964 | NADH dehydrogenase complex                  | -2.02421 | 0.002763968 |
| CC | G0:0045271 | respiratory chain complex I                 | -2.02421 | 0.002763968 |
| BP | G0:0045056 | transcytosis                                | 2.07229  | 0.002763968 |
| BP | G0:0043547 | positive regulation of GTPase activity      | 1.631514 | 0.002766878 |
| BP | G0:0006487 | protein N-linked glycosylation              | -1.9361  | 0.002766878 |
| BP | G0:0002250 | adaptive immune response                    | -1.52477 | 0.002805388 |
| MF | G0:0051287 | NAD binding                                 | -1.88858 | 0.002900207 |
| BP | G0:0001819 | positive regulation of cytokine productio   | 1.488522 | 0.002966831 |
| BP | G0:0032200 | telomere organization                       | -1.80668 | 0.002998358 |
| BP | G0:0030150 | protein import into mitochondrial matrix    | -2.09325 | 0.00300476  |
| MF | G0:0008175 | tRNA methyltransferase activity             | -2.10235 | 0.003103002 |
| BP | G0:0032677 | regulation of interleukin-8 production      | 1.894627 | 0.003128158 |
| BP | G0:0007034 | vacuolar transport                          | 1.722143 | 0.003142667 |
| CC | G0:0061702 | inflammasome complex                        | 2.042538 | 0.003157392 |
| CC | G0:0097525 | spliceosomal snRNP complex                  | -1.92942 | 0.003216744 |
| MF | G0:0008484 | sulfuric ester hydrolase activity           | 2.079145 | 0.003216744 |
| MF | G0:0023026 | MHC class II protein complex binding        | -2.07111 | 0.003238885 |
| BP | G0:0044247 | cellular polysaccharide catabolic proces    | 2.093553 | 0.003238885 |
| MF | G0:0004065 | arylsulfatase activity                      | 2.044259 | 0.003254159 |
| MF | G0:0016887 | ATP hydrolysis activity                     | -1.5845  | 0.003304147 |
| BP | G0:0030837 | negative regulation of actin filament pol   | 1.962945 | 0.003319083 |



|    |            |                                           |          |             |
|----|------------|-------------------------------------------|----------|-------------|
| BP | G0:2000116 | regulation of cysteine-type endopeptidase | 1.621395 | 0.003338796 |
| BP | G0:0009303 | rRNA transcription                        | -2.03635 | 0.003390261 |
| BP | G0:0065002 | intracellular protein transmembrane trans | -1.9802  | 0.003405199 |
| BP | G0:0043300 | regulation of leukocyte degranulation     | 1.96941  | 0.003461727 |
| CC | G0:1990204 | oxidoreductase complex                    | -1.8207  | 0.003461727 |
| BP | G0:0016054 | organic acid catabolic process            | -1.62182 | 0.003482659 |
| BP | G0:0009251 | glucan catabolic process                  | 2.033453 | 0.003537835 |
| BP | G0:0032273 | positive regulation of protein polymeriza | 1.739247 | 0.003537835 |
| BP | G0:0071496 | cellular response to external stimulus    | 1.564868 | 0.003543454 |
| BP | G0:0010950 | positive regulation of endopeptidase acti | 1.679678 | 0.003583193 |
| BP | G0:0070943 | neutrophil-mediated killing of symbiont   | 2.008668 | 0.003607897 |
| BP | G0:0006488 | dolichol-linked oligosaccharide biosynthe | -2.01772 | 0.003778636 |
| BP | G0:0046395 | carboxylic acid catabolic process         | -1.60702 | 0.003778636 |
| BP | G0:0045005 | DNA-dependent DNA replication maintenanc  | -2.009   | 0.003778636 |
| BP | G0:0006490 | oligosaccharide-lipid intermediate biosyr | -2.02091 | 0.003798997 |
| BP | G0:0002833 | positive regulation of response to biotic | 1.658506 | 0.003798997 |
| BP | G0:0010952 | positive regulation of peptidase activity | 1.621468 | 0.003830166 |
| MF | G0:1901981 | phosphatidylinositol phosphate binding    | 1.692051 | 0.003840331 |
| MF | G0:0005347 | ATP transmembrane transporter activity    | -2.02678 | 0.003848942 |
| BP | G0:0071806 | protein transmembrane transport           | -1.91158 | 0.003866765 |
| BP | G0:0071347 | cellular response to interleukin-1        | 1.773309 | 0.003933444 |
| BP | G0:0044262 | cellular carbohydrate metabolic process   | 1.549376 | 0.003933444 |
| BP | G0:0008286 | insulin receptor signaling pathway        | 1.773683 | 0.003953667 |
| CC | G0:0098562 | cytoplasmic side of membrane              | 1.595854 | 0.003987533 |
| BP | G0:0006801 | superoxide metabolic process              | 1.927348 | 0.004037952 |
| BP | G0:1903532 | positive regulation of secretion by cell  | 1.566103 | 0.004047864 |
| CC | G0:0005765 | lysosomal membrane                        | 1.493676 | 0.004061124 |
| CC | G0:0098852 | lytic vacuole membrane                    | 1.493676 | 0.004061124 |
| BP | G0:0009150 | purine ribonucleotide metabolic process   | -1.56103 | 0.004115116 |
| BP | G0:0006691 | leukotriene metabolic process             | 2.027168 | 0.004210819 |
| BP | G0:0072528 | pyrimidine-containing compound biosynthe  | -1.99586 | 0.004226759 |
| BP | G0:0070202 | regulation of establishment of protein lo | -2.02434 | 0.004226759 |
| BP | G0:0070203 | regulation of establishment of protein lo | -2.02434 | 0.004226759 |
| BP | G0:0048771 | tissue remodeling                         | 1.656052 | 0.004256845 |
| BP | G0:1903405 | protein localization to nuclear body      | -2.02209 | 0.004256845 |
| BP | G0:1904867 | protein localization to Cajal body        | -2.02209 | 0.004256845 |
| BP | G0:1904869 | regulation of protein localization to Ca  | -2.02209 | 0.004256845 |
| BP | G0:1904871 | positive regulation of protein localizati | -2.02209 | 0.004256845 |
| BP | G0:0042060 | wound healing                             | 1.466169 | 0.004316169 |
| BP | G0:0048260 | positive regulation of receptor-mediated  | 1.869799 | 0.004316169 |
| BP | G0:0006120 | mitochondrial electron transport, NADH t  | -1.95586 | 0.004316169 |
| BP | G0:0018107 | peptidyl-threonine phosphorylation        | 1.73649  | 0.004339959 |
| BP | G0:0009112 | nucleobase metabolic process              | -1.98812 | 0.004339959 |
| BP | G0:0002220 | innate immune response activating cell s  | 2.017976 | 0.004347131 |
| MF | G0:0005078 | MAP-kinase scaffold activity              | 1.994451 | 0.004351191 |
| BP | G0:0007178 | transmembrane receptor protein serine/thr | 1.521991 | 0.004416961 |
| BP | G0:0002501 | peptide antigen assembly with MHC protei  | -2.00445 | 0.004452125 |
| BP | G0:0007041 | lysosomal transport                       | 1.763845 | 0.004452125 |
| BP | G0:0043038 | amino acid activation                     | -1.96405 | 0.004452125 |
| CC | G0:0031234 | extrinsic component of cytoplasmic side   | 1.764339 | 0.00445727  |
| MF | G0:0046332 | SMAD binding                              | 1.838511 | 0.00451172  |
| BP | G0:0051251 | positive regulation of lymphocyte activat | -1.54827 | 0.004626614 |
| BP | G0:0001818 | negative regulation of cytokine producti  | 1.540854 | 0.004626614 |
| BP | G0:0034142 | toll-like receptor 4 signaling pathway    | 1.967629 | 0.004680935 |

|    |            |                                            |          |             |
|----|------------|--------------------------------------------|----------|-------------|
| CC | G0:0043596 | nuclear replication fork                   | -2.01226 | 0.004712892 |
| BP | G0:0009066 | aspartate family amino acid metabolic proc | -1.94357 | 0.004712892 |
| BP | G0:0002831 | regulation of response to biotic stimulus  | 1.498906 | 0.004832606 |
| BP | G0:0044282 | small molecule catabolic process           | -1.51102 | 0.00488138  |
| MF | G0:0043022 | ribosome binding                           | -1.89202 | 0.004883459 |
| MF | G0:0003953 | NAD <sup>+</sup> nucleosidase activity     | 1.990393 | 0.004990955 |
| BP | G0:1902115 | regulation of organelle assembly           | 1.635686 | 0.004990955 |
| BP | G0:0045860 | positive regulation of protein kinase acti | 1.464015 | 0.005011393 |
| BP | G0:0010506 | regulation of autophagy                    | 1.537751 | 0.005042598 |
| BP | G0:0097320 | plasma membrane tubulation                 | 2.040595 | 0.005042598 |
| BP | G0:0006099 | tricarboxylic acid cycle                   | -1.97071 | 0.005042598 |
| BP | G0:0051648 | vesicle localization                       | 1.649527 | 0.005128117 |
| MF | G0:0005096 | GTPase activator activity                  | 1.4922   | 0.005165174 |
| BP | G0:0045921 | positive regulation of exocytosis          | 1.799933 | 0.005217055 |
| BP | G0:0005976 | polysaccharide metabolic process           | 1.784586 | 0.005225322 |
| BP | G0:0090322 | regulation of superoxide metabolic proces  | 1.989028 | 0.005249006 |
| MF | G0:0045182 | translation regulator activity             | -1.76375 | 0.005252244 |
| BP | G0:0002399 | MHC class II protein complex assembly      | -1.98754 | 0.005252244 |
| BP | G0:0002503 | peptide antigen assembly with MHC class I  | -1.98754 | 0.005252244 |
| MF | G0:0003899 | DNA-directed 5'-3' RNA polymerase activit  | -1.96093 | 0.005331057 |
| BP | G0:0034121 | regulation of toll-like receptor signalin  | 1.848708 | 0.005346999 |
| BP | G0:0070199 | establishment of protein localization to   | -1.99215 | 0.005419035 |
| BP | G0:0032928 | regulation of superoxide anion generatio   | 1.994794 | 0.005572808 |
| BP | G0:0016226 | iron-sulfur cluster assembly               | -2.00744 | 0.005605994 |
| BP | G0:0031163 | metallo-sulfur cluster assembly            | -2.00744 | 0.005605994 |
| BP | G0:0045058 | T cell selection                           | -1.84514 | 0.005643614 |
| BP | G0:0043648 | dicarboxylic acid metabolic process        | -1.77101 | 0.005644197 |
| BP | G0:1902622 | regulation of neutrophil migration         | 1.95512  | 0.005677356 |
| BP | G0:0002449 | lymphocyte mediated immunity               | -1.56756 | 0.005705587 |
| BP | G0:0043620 | regulation of DNA-templated transcription  | 1.862974 | 0.005705587 |
| BP | G0:0030100 | regulation of endocytosis                  | 1.561704 | 0.005705587 |
| BP | G0:0002223 | stimulatory C-type lectin receptor signal  | 2.041361 | 0.005705587 |
| BP | G0:1990840 | response to lectin                         | 2.041361 | 0.005705587 |
| BP | G0:1990858 | cellular response to lectin                | 2.041361 | 0.005705587 |
| CC | G0:0030133 | transport vesicle                          | 1.471539 | 0.0057352   |
| BP | G0:0033044 | regulation of chromosome organization      | -1.65732 | 0.005776779 |
| BP | G0:0045807 | positive regulation of endocytosis         | 1.758856 | 0.005899026 |
| MF | G0:0003955 | NAD(P)H dehydrogenase (quinone) activity   | -1.98875 | 0.005966244 |
| BP | G0:0051047 | positive regulation of secretion           | 1.502341 | 0.006007138 |
| BP | G0:1901186 | positive regulation of ERBB signaling pat  | 1.932953 | 0.006097913 |
| MF | G0:0008186 | ATP-dependent activity, acting on RNA      | -1.79281 | 0.006097913 |
| BP | G0:0038066 | p38MAPK cascade                            | 1.918226 | 0.006097913 |
| BP | G0:1901653 | cellular response to peptide               | 1.463127 | 0.006097913 |
| BP | G0:0050832 | defense response to fungus                 | 1.917586 | 0.006154093 |
| BP | G0:0006417 | regulation of translation                  | -1.52834 | 0.006173395 |
| BP | G0:0051549 | positive regulation of keratinocyte migræ  | 1.96845  | 0.006298012 |
| BP | G0:0007007 | inner mitochondrial membrane organizatio   | -1.95444 | 0.00637881  |
| BP | G0:0033002 | muscle cell proliferation                  | 1.584776 | 0.006454259 |
| BP | G0:0051656 | establishment of organelle localization    | 1.47979  | 0.006454259 |
| MF | G0:0030695 | GTPase regulator activity                  | 1.456776 | 0.006454259 |
| MF | G0:0060589 | nucleoside-triphosphatase regulator activ  | 1.456776 | 0.006454259 |
| BP | G0:0009168 | purine ribonucleoside monophosphate biosy  | -1.97595 | 0.006454259 |
| CC | G0:0042613 | MHC class II protein complex               | -1.97635 | 0.006454259 |
| BP | G0:1990776 | response to angiotensin                    | 1.984586 | 0.006547032 |

|    |            |                                           |          |             |
|----|------------|-------------------------------------------|----------|-------------|
| BP | G0:0051347 | positive regulation of transferase activi | 1.404129 | 0.006548476 |
| CC | G0:0005775 | vacuolar lumen                            | 1.668347 | 0.006607291 |
| BP | G0:0022616 | DNA strand elongation                     | -2.01597 | 0.006632594 |
| BP | G0:0032611 | interleukin-1 beta production             | 1.755927 | 0.006671286 |
| BP | G0:0032651 | regulation of interleukin-1 beta producti | 1.755927 | 0.006671286 |
| MF | G0:0030275 | LRR domain binding                        | 2.008569 | 0.006698155 |
| MF | G0:0034062 | 5'-3' RNA polymerase activity             | -1.93765 | 0.006785255 |
| MF | G0:0097747 | RNA polymerase activity                   | -1.93765 | 0.006785255 |
| MF | G0:0004536 | deoxyribonuclease activity                | -1.90485 | 0.00688161  |
| BP | G0:0071706 | tumor necrosis factor superfamily cytokin | 1.621954 | 0.00688161  |
| BP | G0:1903555 | regulation of tumor necrosis factor super | 1.621954 | 0.00688161  |
| BP | G0:1902905 | positive regulation of supramolecular fil | 1.585908 | 0.00688161  |
| BP | G0:0043628 | ncRNA 3'-end processing                   | -1.93268 | 0.006942854 |
| BP | G0:1900076 | regulation of cellular response to insuli | 1.849582 | 0.006942854 |
| MF | G0:0003724 | RNA helicase activity                     | -1.774   | 0.006942854 |
| BP | G0:0009265 | 2'-deoxyribonucleotide biosynthetic proc  | -1.98527 | 0.006949298 |
| BP | G0:0046385 | deoxyribose phosphate biosynthetic proces | -1.98527 | 0.006949298 |
| BP | G0:0070570 | regulation of neuron projection regenerat | 1.961106 | 0.006949298 |
| BP | G0:1903037 | regulation of leukocyte cell-cell adhesio | -1.50002 | 0.006949298 |
| BP | G0:0043406 | positive regulation of MAP kinase activit | 1.689965 | 0.006956326 |
| MF | G0:0038187 | pattern recognition receptor activity     | 1.974427 | 0.006961686 |
| BP | G0:0010975 | regulation of neuron projection developme | 1.433412 | 0.007051325 |
| MF | G0:0003697 | single-stranded DNA binding               | -1.6943  | 0.007063352 |
| BP | G0:1905114 | cell surface receptor signaling pathway   | 1.399925 | 0.007088562 |
| BP | G0:0045730 | respiratory burst                         | 1.912902 | 0.007088562 |
| BP | G0:0051961 | negative regulation of nervous system dev | 1.643358 | 0.007093939 |
| BP | G0:0045061 | thymic T cell selection                   | -1.92237 | 0.007113473 |
| BP | G0:0060284 | regulation of cell development            | 1.411176 | 0.007178689 |
| BP | G0:1990173 | protein localization to nucleoplasm       | -1.98893 | 0.007179109 |
| BP | G0:0010592 | positive regulation of lamellipodium ass  | 2.007008 | 0.007187834 |
| BP | G0:1903557 | positive regulation of tumor necrosis fac | 1.720017 | 0.007335283 |
| BP | G0:0043374 | CD8-positive, alpha-beta T cell different | -2.01397 | 0.007381541 |
| BP | G0:0043409 | negative regulation of MAPK cascade       | 1.586044 | 0.007403845 |
| BP | G0:0071902 | positive regulation of protein serine/thr | 1.551397 | 0.0074299   |
| CC | G0:0030532 | small nuclear ribonucleoprotein complex   | -1.83591 | 0.007446169 |
| BP | G0:0007254 | JNK cascade                               | 1.608704 | 0.00747625  |
| MF | G0:0042578 | phosphoric ester hydrolase activity       | 1.469854 | 0.00747625  |
| BP | G0:0006302 | double-strand break repair                | -1.58008 | 0.007730085 |
| BP | G0:0035994 | response to muscle stretch                | 1.96249  | 0.007858397 |
| BP | G0:0042769 | DNA damage response, detection of DNA dar | -2.00162 | 0.007973749 |
| MF | G0:0016790 | thiolester hydrolase activity             | -1.92425 | 0.00801868  |
| BP | G0:0032869 | cellular response to insulin stimulus     | 1.574597 | 0.00801868  |
| BP | G0:0010591 | regulation of lamellipodium assembly      | 1.86984  | 0.008038424 |
| BP | G0:0062125 | regulation of mitochondrial gene expressi | -1.94601 | 0.008053784 |
| BP | G0:0034123 | positive regulation of toll-like receptor | 1.948733 | 0.008454452 |
| CC | G0:0031011 | Ino80 complex                             | -1.95802 | 0.008551537 |
| BP | G0:0008652 | cellular amino acid biosynthetic process  | -1.74247 | 0.008658627 |
| BP | G0:0032612 | interleukin-1 production                  | 1.703854 | 0.008658627 |
| BP | G0:0032652 | regulation of interleukin-1 production    | 1.703854 | 0.008658627 |
| CC | G0:0034719 | SMN-Sm protein complex                    | -1.95135 | 0.008680025 |
| BP | G0:0045089 | positive regulation of innate immune res  | 1.631322 | 0.008728957 |
| BP | G0:0006397 | mRNA processing                           | -1.49451 | 0.008728957 |
| BP | G0:0009116 | nucleoside metabolic process              | -1.82994 | 0.008747656 |
| BP | G0:0046501 | protoporphyrinogen IX metabolic process   | -1.9727  | 0.008755841 |

|    |            |                                           |          |             |
|----|------------|-------------------------------------------|----------|-------------|
| CC | G0:0031143 | pseudopodium                              | 1.987914 | 0.00880674  |
| BP | G0:0008333 | endosome to lysosome transport            | 1.876489 | 0.00880674  |
| CC | G0:0140534 | endoplasmic reticulum protein-containing  | -1.66898 | 0.009200633 |
| MF | G0:0015926 | glucosidase activity                      | 1.951371 | 0.009266957 |
| BP | G0:0006898 | receptor-mediated endocytosis             | 1.512745 | 0.009378258 |
| BP | G0:0070131 | positive regulation of mitochondrial tran | -1.94809 | 0.009417066 |
| BP | G0:0032490 | detection of molecule of bacterial origin | 1.933152 | 0.009420273 |
| BP | G0:0043650 | dicarboxylic acid biosynthetic process    | -1.94319 | 0.009510171 |
| BP | G0:0070304 | positive regulation of stress-activated p | 1.67607  | 0.009524178 |
| BP | G0:0010657 | muscle cell apoptotic process             | 1.793938 | 0.009635864 |
| BP | G0:0032494 | response to peptidoglycan                 | 1.931635 | 0.009710795 |
| BP | G0:0051546 | keratinocyte migration                    | 1.945646 | 0.009719182 |
| CC | G0:0009898 | cytoplasmic side of plasma membrane       | 1.568371 | 0.009719182 |
| BP | G0:0110096 | cellular response to aldehyde             | -1.98872 | 0.009719182 |
| CC | G0:0030496 | midbody                                   | 1.597945 | 0.009794951 |
| CC | G0:0071013 | catalytic step 2 spliceosome              | -1.79148 | 0.009794951 |
| MF | G0:0031369 | translation initiation factor binding     | -1.91207 | 0.009794951 |
| MF | G0:0003712 | transcription coregulator activity        | 1.428847 | 0.009958397 |
| BP | G0:0006073 | cellular glucan metabolic process         | 1.778678 | 0.00996749  |
| BP | G0:0044042 | glucan metabolic process                  | 1.778678 | 0.00996749  |
| CC | G0:1902911 | protein kinase complex                    | 1.741636 | 0.00996749  |
| CC | G0:0017053 | transcription repressor complex           | 1.817934 | 0.010106699 |
| BP | G0:0032259 | methylation                               | -1.52143 | 0.010295859 |
| CC | G0:0005938 | cell cortex                               | 1.45716  | 0.010370292 |
| BP | G0:0032760 | positive regulation of tumor necrosis fac | 1.666897 | 0.010538512 |
| BP | G0:1903358 | regulation of Golgi organization          | 1.931112 | 0.010550851 |
| BP | G0:0002090 | regulation of receptor internalization    | 1.809511 | 0.010576223 |
| BP | G0:0051249 | regulation of lymphocyte activation       | -1.4555  | 0.010629402 |
| BP | G0:0032640 | tumor necrosis factor production          | 1.579673 | 0.010629402 |
| BP | G0:0032680 | regulation of tumor necrosis factor produ | 1.579673 | 0.010629402 |
| BP | G0:0030838 | positive regulation of actin filament pol | 1.70322  | 0.010691929 |
| MF | G0:0016836 | hydro-lyase activity                      | -1.78196 | 0.010781718 |
| BP | G0:0000460 | maturation of 5.8S rRNA                   | -1.8937  | 0.010781718 |
| MF | G0:0051015 | actin filament binding                    | 1.571129 | 0.010781718 |
| BP | G0:0043281 | regulation of cysteine-type endopeptidase | 1.555049 | 0.010793486 |
| BP | G0:0098581 | detection of external biotic stimulus     | 1.96645  | 0.010793486 |
| BP | G0:0031623 | receptor internalization                  | 1.663599 | 0.011016656 |
| BP | G0:0006298 | mismatch repair                           | -1.9042  | 0.011016656 |
| BP | G0:0031669 | cellular response to nutrient levels      | 1.565924 | 0.011021507 |
| BP | G0:0031331 | positive regulation of cellular catabolic | 1.413148 | 0.011021507 |
| CC | G0:0005736 | RNA polymerase I complex                  | -1.9363  | 0.011021507 |
| BP | G0:0048259 | regulation of receptor-mediated endocytos | 1.683441 | 0.011037765 |
| BP | G0:0042116 | macrophage activation                     | 1.691953 | 0.011074037 |
| BP | G0:0035872 | nucleotide-binding domain, leucine rich   | 1.977725 | 0.011081271 |
| BP | G0:0043434 | response to peptide hormone               | 1.432315 | 0.011097594 |
| BP | G0:0007249 | I-kappaB kinase/NF-kappaB signaling       | 1.496667 | 0.011162919 |
| CC | G0:0005884 | actin filament                            | 1.686155 | 0.01119248  |
| BP | G0:0051051 | negative regulation of transport          | 1.431281 | 0.01119248  |
| BP | G0:0006637 | acyl-CoA metabolic process                | -1.69595 | 0.01119248  |
| BP | G0:0035383 | thioester metabolic process               | -1.69595 | 0.01119248  |
| CC | G0:0005732 | sno(s)RNA-containing ribonucleoprotein co | -1.92188 | 0.01123863  |
| BP | G0:0018108 | peptidyl-tyrosine phosphorylation         | 1.430291 | 0.01124474  |
| BP | G0:0038061 | NIK/NF-kappaB signaling                   | 1.630624 | 0.011247755 |
| BP | G0:0060560 | developmental growth involved in morphoge | 1.493017 | 0.011300155 |

|    |            |                                                      |          |             |
|----|------------|------------------------------------------------------|----------|-------------|
| BP | G0:0042987 | amyloid precursor protein catabolic process          | 1.791009 | 0.011317049 |
| BP | G0:0050768 | negative regulation of neurogenesis                  | 1.624004 | 0.011317049 |
| BP | G0:0097479 | synaptic vesicle localization                        | 1.838896 | 0.011341929 |
| MF | G0:0044183 | protein folding chaperone                            | -1.93237 | 0.011341929 |
| BP | G0:0070942 | neutrophil mediated cytotoxicity                     | 1.94517  | 0.01134476  |
| BP | G0:0010608 | posttranscriptional regulation of gene expression    | -1.43609 | 0.011552691 |
| BP | G0:0070423 | nucleotide-binding oligomerization domain            | 1.959949 | 0.011697519 |
| CC | G0:0019897 | extrinsic component of plasma membrane               | 1.58446  | 0.011720513 |
| BP | G0:0032733 | positive regulation of interleukin-10 production     | 1.865941 | 0.011744175 |
| BP | G0:1901214 | regulation of neuron death                           | 1.471518 | 0.011821835 |
| BP | G0:0002886 | regulation of myeloid leukocyte mediated             | 1.781397 | 0.011845146 |
| CC | G0:0098978 | glutamatergic synapse                                | 1.439683 | 0.011878105 |
| BP | G0:0051348 | negative regulation of transferase activity          | 1.491211 | 0.011878105 |
| BP | G0:0045069 | regulation of viral genome replication               | -1.70258 | 0.011878105 |
| MF | G0:0017070 | U6 snRNA binding                                     | -1.95542 | 0.011903979 |
| BP | G0:0002526 | acute inflammatory response                          | 1.633487 | 0.011904931 |
| MF | G0:0016796 | exonuclease activity, active with either             | -1.7717  | 0.01197339  |
| BP | G0:0002433 | immune response-regulating cell surface              | 1.908202 | 0.011982407 |
| BP | G0:0038096 | Fc-gamma receptor signaling pathway involving        | 1.908202 | 0.011982407 |
| BP | G0:0031167 | rRNA methylation                                     | -1.94232 | 0.012281026 |
| BP | G0:0070944 | neutrophil-mediated killing of bacterium             | 1.927412 | 0.01228393  |
| BP | G0:0044546 | NLRP3 inflammasome complex assembly                  | 1.969052 | 0.01228393  |
| BP | G0:0140632 | inflammasome complex assembly                        | 1.969052 | 0.01228393  |
| BP | G0:0030177 | positive regulation of Wnt signaling pathway         | 1.57849  | 0.012320803 |
| BP | G0:0010659 | cardiac muscle cell apoptotic process                | 1.908835 | 0.012353558 |
| BP | G0:0001890 | placenta development                                 | 1.557777 | 0.012449647 |
| BP | G0:0006779 | porphyrin-containing compound biosynthesis           | -1.8894  | 0.012495566 |
| BP | G0:0033014 | tetrapyrrole biosynthetic process                    | -1.8894  | 0.012495566 |
| BP | G0:0010660 | regulation of muscle cell apoptotic process          | 1.735534 | 0.01270072  |
| CC | G0:0001401 | SAM complex                                          | -1.93907 | 0.01270072  |
| CC | G0:0140275 | MIB complex                                          | -1.93907 | 0.01270072  |
| BP | G0:0032868 | response to insulin                                  | 1.493148 | 0.013011014 |
| BP | G0:0002573 | myeloid leukocyte differentiation                    | 1.536938 | 0.013121095 |
| BP | G0:0051650 | establishment of vesicle localization                | 1.592235 | 0.013131967 |
| BP | G0:0008380 | RNA splicing                                         | -1.48111 | 0.013320332 |
| BP | G0:0022409 | positive regulation of cell-cell adhesion            | -1.48897 | 0.013322004 |
| BP | G0:0032874 | positive regulation of stress-activated MAPK         | 1.608418 | 0.013322004 |
| BP | G0:0098543 | detection of other organism                          | 1.94919  | 0.013322004 |
| BP | G0:0032418 | lysosome localization                                | 1.733452 | 0.013322004 |
| BP | G0:0098781 | ncRNA transcription                                  | -1.83697 | 0.013333358 |
| BP | G0:0030308 | negative regulation of cell growth                   | 1.520732 | 0.01343686  |
| MF | G0:0008094 | ATP-dependent activity, acting on DNA                | -1.6965  | 0.013668633 |
| MF | G0:0016922 | nuclear receptor binding                             | 1.613052 | 0.013712947 |
| BP | G0:0009142 | nucleoside triphosphate biosynthetic process         | -1.76106 | 0.013712947 |
| MF | G0:0005149 | interleukin-1 receptor binding                       | 1.886067 | 0.013932294 |
| BP | G0:0051054 | positive regulation of DNA metabolic process         | -1.56058 | 0.014008455 |
| BP | G0:0018212 | peptidyl-tyrosine modification                       | 1.432553 | 0.014008455 |
| BP | G0:0036257 | multivesicular body organization                     | 1.892164 | 0.014056084 |
| BP | G0:0033013 | tetrapyrrole metabolic process                       | -1.72413 | 0.014080744 |
| BP | G0:0042790 | nucleolar large rRNA transcription by RNA polymerase | -1.94718 | 0.014089664 |
| BP | G0:0016049 | cell growth                                          | 1.407371 | 0.014119791 |
| BP | G0:0007032 | endosome organization                                | 1.764266 | 0.01416304  |
| BP | G0:0051346 | negative regulation of hydrolase activity            | 1.399894 | 0.01416304  |
| BP | G0:0000966 | RNA 5'-end processing                                | -1.89824 | 0.014218338 |

|    |            |                                           |          |             |
|----|------------|-------------------------------------------|----------|-------------|
| BP | G0:0046033 | AMP metabolic process                     | -1.8996  | 0.014218338 |
| BP | G0:0051098 | regulation of binding                     | 1.429966 | 0.014218338 |
| BP | G0:0006112 | energy reserve metabolic process          | 1.694672 | 0.01430083  |
| BP | G0:0032715 | negative regulation of interleukin-6 prod | 1.833268 | 0.01430083  |
| BP | G0:0042110 | T cell activation                         | -1.42709 | 0.01430083  |
| CC | G0:0005777 | peroxisome                                | -1.60312 | 0.014486384 |
| CC | G0:0042579 | microbody                                 | -1.60312 | 0.014486384 |
| BP | G0:0070997 | neuron death                              | 1.428241 | 0.014486384 |
| MF | G0:0036041 | long-chain fatty acid binding             | 1.915817 | 0.014684855 |
| BP | G0:0002639 | positive regulation of immunoglobulin pro | -1.81416 | 0.014702817 |
| BP | G0:0032731 | positive regulation of interleukin-1 beta | 1.766497 | 0.014702817 |
| BP | G0:0031668 | cellular response to extracellular stimul | 1.479212 | 0.014778765 |
| BP | G0:0009062 | fatty acid catabolic process              | -1.68704 | 0.014899158 |
| BP | G0:1902683 | regulation of receptor localization to sy | 1.92931  | 0.014915404 |
| MF | G0:0016780 | phosphotransferase activity, for other su | -1.88964 | 0.014915404 |
| BP | G0:0032102 | negative regulation of response to exter  | 1.400727 | 0.014915404 |
| CC | G0:0000428 | DNA-directed RNA polymerase complex       | -1.66704 | 0.014961228 |
| BP | G0:1902745 | positive regulation of lamellipodium orga | 1.888511 | 0.015393947 |
| BP | G0:0009896 | positive regulation of catabolic process  | 1.395277 | 0.015448955 |
| CC | G0:0000421 | autophagosome membrane                    | 1.828886 | 0.015448955 |
| BP | G0:0043414 | macromolecule methylation                 | -1.50505 | 0.015448955 |
| CC | G0:0005744 | TIM23 mitochondrial import inner membran  | -1.89555 | 0.015448955 |
| CC | G0:0030666 | endocytic vesicle membrane                | 1.52625  | 0.015448955 |
| BP | G0:0001525 | angiogenesis                              | 1.370193 | 0.015448955 |
| BP | G0:0002183 | cytoplasmic translational initiation      | -1.89127 | 0.01546116  |
| BP | G0:0090312 | positive regulation of protein deacetyl   | 1.876699 | 0.015480205 |
| BP | G0:0050854 | regulation of antigen receptor-mediated   | -1.76196 | 0.015480205 |
| MF | G0:0019205 | nucleobase-containing compound kinase act | -1.81961 | 0.015480205 |
| BP | G0:0043368 | positive T cell selection                 | -1.82201 | 0.015480205 |
| BP | G0:0018279 | protein N-linked glycosylation via aspara | -1.87923 | 0.015576523 |
| BP | G0:0006188 | IMP biosynthetic process                  | -1.90677 | 0.015585926 |
| BP | G0:0042407 | crisetae formation                        | -1.93064 | 0.01569355  |
| BP | G0:1901184 | regulation of ERBB signaling pathway      | 1.707892 | 0.015793279 |
| BP | G0:0010665 | regulation of cardiac muscle cell apopto  | 1.818727 | 0.01581736  |
| BP | G0:0014855 | striated muscle cell proliferation        | 1.756283 | 0.015932966 |
| BP | G0:0006631 | fatty acid metabolic process              | -1.43878 | 0.015996347 |
| BP | G0:0009612 | response to mechanical stimulus           | 1.49301  | 0.015996347 |
| BP | G0:0015931 | nucleobase-containing compound transport  | -1.54615 | 0.016009994 |
| MF | G0:0016651 | oxidoreductase activity, acting on NAD(P) | -1.71311 | 0.016009994 |
| BP | G0:0010833 | telomere maintenance via telomere length  | -1.73852 | 0.01601607  |
| BP | G0:0097581 | lamellipodium organization                | 1.705264 | 0.016020337 |
| CC | G0:0005685 | U1 snRNP                                  | -1.8812  | 0.016042798 |
| BP | G0:0000054 | ribosomal subunit export from nucleus     | -1.89819 | 0.016042798 |
| BP | G0:0033750 | ribosome localization                     | -1.89819 | 0.016042798 |
| BP | G0:0034502 | protein localization to chromosome        | -1.67085 | 0.016042798 |
| BP | G0:0002637 | regulation of immunoglobulin production   | -1.71247 | 0.016042798 |
| BP | G0:0022411 | cellular component disassembly            | 1.376154 | 0.016042798 |
| BP | G0:0002263 | cell activation involved in immune respon | 1.419753 | 0.016046609 |
| BP | G0:0002708 | positive regulation of lymphocyte mediat  | -1.61124 | 0.016341847 |
| BP | G0:0090151 | establishment of protein localization to  | -1.87165 | 0.016376165 |
| BP | G0:0070200 | establishment of protein localization to  | -1.89209 | 0.016376165 |
| BP | G0:0099504 | synaptic vesicle cycle                    | 1.506293 | 0.016403309 |
| BP | G0:0005977 | glycogen metabolic process                | 1.706534 | 0.016417015 |
| BP | G0:0038094 | Fc-gamma receptor signaling pathway       | 1.869183 | 0.016421824 |

|    |            |                                            |          |             |
|----|------------|--------------------------------------------|----------|-------------|
| BP | G0:0006783 | heme biosynthetic process                  | -1.85181 | 0.016555005 |
| BP | G0:0044088 | regulation of vacuole organization         | 1.873317 | 0.016555005 |
| MF | G0:0004812 | aminoacyl-tRNA ligase activity             | -1.88762 | 0.016597048 |
| BP | G0:0006418 | tRNA aminoacylation for protein translati  | -1.88762 | 0.016597048 |
| MF | G0:0016875 | ligase activity, forming carbon-oxygen bc  | -1.88762 | 0.016597048 |
| BP | G0:0008360 | regulation of cell shape                   | 1.565176 | 0.016660588 |
| BP | G0:0046459 | short-chain fatty acid metabolic process   | -1.88973 | 0.016693969 |
| MF | G0:0008649 | rRNA methyltransferase activity            | -1.88486 | 0.016693969 |
| MF | G0:0140102 | catalytic activity, acting on a rRNA       | -1.88486 | 0.016693969 |
| BP | G0:0031333 | negative regulation of protein-containin   | 1.58768  | 0.016905207 |
| BP | G0:0045123 | cellular extravasation                     | 1.717557 | 0.016993267 |
| BP | G0:0098927 | vesicle-mediated transport between endosc  | 1.867701 | 0.017032443 |
| CC | G0:0000781 | chromosome, telomeric region               | -1.59907 | 0.017038186 |
| BP | G0:1901216 | positive regulation of neuron death        | 1.641253 | 0.017075475 |
| BP | G0:0016071 | mRNA metabolic process                     | -1.37647 | 0.017075475 |
| BP | G0:1900225 | regulation of NLRP3 inflammasome complex   | 1.866518 | 0.01721321  |
| BP | G0:0019068 | virion assembly                            | 1.866025 | 0.01721321  |
| MF | G0:0017124 | SH3 domain binding                         | 1.571928 | 0.017551457 |
| BP | G0:0031346 | positive regulation of cell projection on  | 1.426514 | 0.017569369 |
| BP | G0:0034143 | regulation of toll-like receptor 4 signa   | 1.886642 | 0.017596209 |
| BP | G0:0005980 | glycogen catabolic process                 | 1.890256 | 0.017624347 |
| BP | G0:0010658 | striated muscle cell apoptotic process     | 1.867342 | 0.01779256  |
| BP | G0:0010662 | regulation of striated muscle cell apopt   | 1.768505 | 0.017855166 |
| MF | G0:0016829 | lyase activity                             | -1.55734 | 0.017965453 |
| BP | G0:0060969 | negative regulation of gene silencing      | 1.859778 | 0.018178494 |
| BP | G0:0099003 | vesicle-mediated transport in synapse      | 1.506449 | 0.018384105 |
| BP | G0:1901659 | glycosyl compound biosynthetic process     | -1.87923 | 0.018416905 |
| MF | G0:0102991 | myristoyl-CoA hydrolase activity           | -1.92049 | 0.018591056 |
| BP | G0:0016358 | dendrite development                       | 1.469019 | 0.018591056 |
| BP | G0:0045580 | regulation of T cell differentiation       | -1.59446 | 0.018688543 |
| BP | G0:0006379 | mRNA cleavage                              | -1.85554 | 0.018728511 |
| BP | G0:0034471 | ncRNA 5'-end processing                    | -1.87462 | 0.018728511 |
| BP | G0:0009147 | pyrimidine nucleoside triphosphate metab   | -1.935   | 0.018751488 |
| BP | G0:0009130 | pyrimidine nucleoside monophosphate biosy  | -1.91    | 0.018999259 |
| BP | G0:0051494 | negative regulation of cytoskeleton organ  | 1.580677 | 0.019084819 |
| BP | G0:0046514 | ceramide catabolic process                 | 1.859513 | 0.019115975 |
| BP | G0:1901361 | organic cyclic compound catabolic proces   | -1.39943 | 0.019115975 |
| BP | G0:0032732 | positive regulation of interleukin-1 procl | 1.697277 | 0.01915586  |
| BP | G0:0042982 | amyloid precursor protein metabolic proc   | 1.696551 | 0.01915586  |
| MF | G0:0070182 | DNA polymerase binding                     | -1.86678 | 0.019207935 |
| BP | G0:0043525 | positive regulation of neuron apoptotic p  | 1.751966 | 0.019233359 |
| CC | G0:0005819 | spindle                                    | 1.424452 | 0.019371749 |
| BP | G0:0034248 | regulation of cellular amide metabolic pr  | -1.43473 | 0.019589823 |
| BP | G0:2001233 | regulation of apoptotic signaling pathway  | 1.402804 | 0.019666249 |
| BP | G0:0060263 | regulation of respiratory burst            | 1.844947 | 0.019666249 |
| BP | G0:0034655 | nucleobase-containing compound catabolic   | -1.44536 | 0.019666249 |
| BP | G0:0006766 | vitamin metabolic process                  | -1.61631 | 0.019804379 |
| BP | G0:0045646 | regulation of erythrocyte differentiation  | 1.84809  | 0.019832485 |
| BP | G0:0060828 | regulation of canonical Wnt signaling pat  | 1.489581 | 0.019927926 |
| BP | G0:0019884 | antigen processing and presentation of ex  | -1.7559  | 0.020099353 |
| MF | G0:0003995 | acyl-CoA dehydrogenase activity            | -1.86588 | 0.020415949 |
| CC | G0:0030014 | CCR4-NOT complex                           | 1.871204 | 0.020528891 |
| BP | G0:0031638 | zymogen activation                         | 1.728074 | 0.020551016 |
| BP | G0:0022604 | regulation of cell morphogenesis           | 1.408946 | 0.020629642 |

|    |            |                                                                         |          |             |
|----|------------|-------------------------------------------------------------------------|----------|-------------|
| BP | GO:0043951 | negative regulation of cAMP-mediated signaling                          | 1.868918 | 0.021164049 |
| BP | GO:1901652 | response to peptide                                                     | 1.351543 | 0.021269566 |
| BP | GO:0043144 | sno(s)RNA processing                                                    | -1.89951 | 0.021562979 |
| BP | GO:0045637 | regulation of myeloid cell differentiation                              | 1.482471 | 0.021562979 |
| BP | GO:2001020 | regulation of response to DNA damage stimulus                           | -1.51472 | 0.021598952 |
| BP | GO:0043039 | tRNA aminoacylation                                                     | -1.90492 | 0.021829237 |
| BP | GO:0006287 | base-excision repair, gap-filling                                       | -1.90136 | 0.021844113 |
| MF | GO:0106306 | protein serine phosphatase activity                                     | 1.678357 | 0.02194679  |
| MF | GO:0106307 | protein threonine phosphatase activity                                  | 1.678357 | 0.02194679  |
| BP | GO:0031063 | regulation of histone deacetylation                                     | 1.872434 | 0.02199972  |
| BP | GO:0038093 | Fc receptor signaling pathway                                           | 1.773992 | 0.022037169 |
| BP | GO:0050806 | positive regulation of synaptic transmission                            | 1.520874 | 0.022153385 |
| BP | GO:0048588 | developmental cell growth                                               | 1.510777 | 0.022189096 |
| MF | GO:0003729 | mRNA binding                                                            | -1.46788 | 0.022189096 |
| BP | GO:1900744 | regulation of p38MAPK cascade                                           | 1.829966 | 0.022241535 |
| BP | GO:0032508 | DNA duplex unwinding                                                    | -1.64309 | 0.022244927 |
| BP | GO:0007159 | leukocyte cell-cell adhesion                                            | -1.4209  | 0.022305766 |
| BP | GO:0022617 | extracellular matrix disassembly                                        | 1.694695 | 0.022406134 |
| BP | GO:0030522 | intracellular receptor signaling pathway                                | 1.431474 | 0.022524567 |
| BP | GO:1902743 | regulation of lamellipodium organization                                | 1.763557 | 0.022530399 |
| MF | GO:0005536 | glucose binding                                                         | 1.846334 | 0.022643758 |
| MF | GO:0043539 | protein serine/threonine kinase activation                              | 1.774756 | 0.022767251 |
| MF | GO:0019003 | GDP binding                                                             | 1.660817 | 0.022767251 |
| BP | GO:0046323 | glucose import                                                          | 1.74375  | 0.022767251 |
| BP | GO:0030217 | T cell differentiation                                                  | -1.45151 | 0.023195824 |
| MF | GO:0047617 | acyl-CoA hydrolase activity                                             | -1.85733 | 0.023195824 |
| BP | GO:0048661 | positive regulation of smooth muscle cell proliferation                 | 1.647082 | 0.023195824 |
| BP | GO:1903034 | regulation of response to wounding                                      | 1.542025 | 0.023225133 |
| MF | GO:0030515 | snoRNA binding                                                          | -1.78943 | 0.023231342 |
| BP | GO:0050729 | positive regulation of inflammatory response                            | 1.55397  | 0.023261967 |
| BP | GO:0090263 | positive regulation of canonical Wnt signaling                          | 1.640642 | 0.023266043 |
| BP | GO:0071559 | response to transforming growth factor beta                             | 1.412164 | 0.023273598 |
| CC | GO:0005667 | transcription regulator complex                                         | 1.375462 | 0.023321318 |
| CC | GO:0005643 | nuclear pore                                                            | -1.70011 | 0.023497004 |
| BP | GO:1900017 | positive regulation of cytokine production                              | 1.819963 | 0.023541004 |
| MF | GO:0008138 | protein tyrosine/serine/threonine phosphorylation                       | 1.748286 | 0.023564084 |
| BP | GO:1903649 | regulation of cytoplasmic transport                                     | 1.827094 | 0.023700433 |
| BP | GO:0048659 | smooth muscle cell proliferation                                        | 1.489675 | 0.023796088 |
| BP | GO:1904667 | negative regulation of ubiquitin protein ligase activity                | -1.8901  | 0.023950929 |
| BP | GO:0030656 | regulation of vitamin metabolic process                                 | -1.85348 | 0.024017208 |
| BP | GO:0048167 | regulation of synaptic plasticity                                       | 1.513851 | 0.024106558 |
| MF | GO:0016813 | hydrolase activity, acting on carbon-nitrogen bonds, except amide bonds | 1.838942 | 0.024106558 |
| BP | GO:0001959 | regulation of cytokine-mediated signaling pathway                       | 1.531972 | 0.024122423 |
| BP | GO:0009267 | cellular response to starvation                                         | 1.537455 | 0.024723915 |
| BP | GO:0071356 | cellular response to tumor necrosis factor                              | 1.467375 | 0.024725957 |
| CC | GO:0030894 | replisome                                                               | -1.88945 | 0.024982556 |
| BP | GO:0033194 | response to hydroperoxide                                               | 1.842033 | 0.025053293 |
| BP | GO:0120032 | regulation of plasma membrane bounded cell-cell junction assembly       | 1.511175 | 0.025053293 |
| BP | GO:0042102 | positive regulation of T cell proliferation                             | -1.62048 | 0.02506531  |
| BP | GO:0036490 | regulation of translation in response to stress                         | 1.857234 | 0.025414834 |
| BP | GO:0045022 | early endosome to late endosome transport                               | 1.75215  | 0.025414834 |
| CC | GO:0036452 | ESCRT complex                                                           | 1.844821 | 0.025495611 |
| MF | GO:0015399 | primary active transmembrane transporter activity                       | -1.53218 | 0.025536373 |
| BP | GO:0051052 | regulation of DNA metabolic process                                     | -1.43313 | 0.025748541 |



|    |            |                                           |          |             |
|----|------------|-------------------------------------------|----------|-------------|
| BP | G0:0071560 | cellular response to transforming growth  | 1.420781 | 0.025774787 |
| BP | G0:1902904 | negative regulation of supramolecular fil | 1.546003 | 0.025779437 |
| BP | G0:2001238 | positive regulation of extrinsic apopto   | 1.733987 | 0.025859254 |
| BP | G0:0032755 | positive regulation of interleukin-6 pro  | 1.629171 | 0.025864981 |
| BP | G0:0045648 | positive regulation of erythrocyte differ | 1.809209 | 0.026058752 |
| BP | G0:0048489 | synaptic vesicle transport                | 1.717717 | 0.02617882  |
| BP | G0:0006270 | DNA replication initiation                | -1.77539 | 0.026386877 |
| CC | G0:0005782 | peroxisomal matrix                        | -1.6897  | 0.026514982 |
| CC | G0:0031907 | microbody lumen                           | -1.6897  | 0.026514982 |
| BP | G0:0060759 | regulation of response to cytokine stimu  | 1.538237 | 0.026576895 |
| MF | G0:0004540 | ribonuclease activity                     | -1.61595 | 0.026795383 |
| MF | G0:0008106 | alcohol dehydrogenase (NADP+) activity    | -1.84412 | 0.026795383 |
| BP | G0:0061418 | regulation of transcription from RNA poly | 1.837954 | 0.026961127 |
| CC | G0:0150034 | distal axon                               | 1.413317 | 0.027043322 |
| BP | G0:0046697 | decidualization                           | 1.843895 | 0.027069836 |
| BP | G0:0071396 | cellular response to lipid                | 1.336123 | 0.027133707 |
| BP | G0:1901888 | regulation of cell junction assembly      | 1.459654 | 0.027318608 |
| BP | G0:0045742 | positive regulation of epidermal growth   | 1.817302 | 0.027318608 |
| BP | G0:0009064 | glutamine family amino acid metabolic pro | -1.62947 | 0.027318608 |
| BP | G0:0006312 | mitotic recombination                     | -1.87152 | 0.027414368 |
| BP | G0:0006413 | translational initiation                  | -1.63646 | 0.027431949 |
| BP | G0:0032930 | positive regulation of superoxide anion   | 1.876364 | 0.02746492  |
| MF | G0:0004519 | endonuclease activity                     | -1.59425 | 0.02746492  |
| BP | G0:0060491 | regulation of cell projection assembly    | 1.503293 | 0.027525655 |
| BP | G0:0030032 | lamellipodium assembly                    | 1.665972 | 0.027525655 |
| BP | G0:0016575 | histone deacetylation                     | 1.580899 | 0.027539036 |
| BP | G0:0071428 | rRNA-containing ribonucleoprotein comple  | -1.87663 | 0.027539036 |
| CC | G0:0001726 | ruffle                                    | 1.538404 | 0.028002926 |
| BP | G0:0006476 | protein deacetylation                     | 1.579842 | 0.028002926 |
| BP | G0:0045453 | bone resorption                           | 1.634386 | 0.028002926 |
| MF | G0:0016702 | oxidoreductase activity, acting on single | 1.820069 | 0.02816865  |
| BP | G0:0044275 | cellular carbohydrate catabolic process   | 1.766339 | 0.02816865  |
| BP | G0:0007006 | mitochondrial membrane organization       | -1.58635 | 0.028244759 |
| BP | G0:0050869 | negative regulation of B cell activation  | 1.732388 | 0.028276594 |
| MF | G0:0016290 | palmitoyl-CoA hydrolase activity          | -1.83235 | 0.028284585 |
| BP | G0:0045727 | positive regulation of translation        | -1.57442 | 0.028345106 |
| BP | G0:0002366 | leukocyte activation involved in immune   | 1.428556 | 0.028393324 |
| BP | G0:0050830 | defense response to Gram-positive bacteri | 1.598413 | 0.028434226 |
| CC | G0:0001772 | immunological synapse                     | -1.73836 | 0.028514486 |
| BP | G0:0046034 | ATP metabolic process                     | -1.45175 | 0.028621865 |
| BP | G0:0002396 | MHC protein complex assembly              | -1.88946 | 0.028632186 |
| BP | G0:0032272 | negative regulation of protein polymeriza | 1.665688 | 0.028636673 |
| BP | G0:0002700 | regulation of production of molecular mec | -1.50274 | 0.028720478 |
| BP | G0:0061025 | membrane fusion                           | 1.54753  | 0.029200421 |
| BP | G0:0044270 | cellular nitrogen compound catabolic pro  | -1.39723 | 0.029249546 |
| BP | G0:0046700 | heterocycle catabolic process             | -1.38011 | 0.029249546 |
| BP | G0:0051873 | killing by host of symbiont cells         | 1.806257 | 0.029567709 |
| BP | G0:0051883 | killing of cells in other organism invol  | 1.806257 | 0.029567709 |
| BP | G0:0009063 | cellular amino acid catabolic process     | -1.57172 | 0.029567709 |
| BP | G0:0034219 | carbohydrate transmembrane transport      | 1.544857 | 0.029746034 |
| CC | G0:0042788 | polysomal ribosome                        | -1.79239 | 0.029800854 |
| BP | G0:0061077 | chaperone-mediated protein folding        | -1.68241 | 0.030020537 |
| BP | G0:0051056 | regulation of small GTPase mediated sign  | 1.373732 | 0.030058521 |
| BP | G0:1902570 | protein localization to nucleolus         | -1.86638 | 0.030086265 |

|    |            |                                                         |          |             |
|----|------------|---------------------------------------------------------|----------|-------------|
| BP | G0:1901222 | regulation of NIK/NF-kappaB signaling                   | 1.562875 | 0.03014193  |
| BP | G0:0051016 | barbed-end actin filament capping                       | 1.832442 | 0.03014193  |
| BP | G0:0032613 | interleukin-10 production                               | 1.671072 | 0.030302567 |
| BP | G0:0032653 | regulation of interleukin-10 production                 | 1.671072 | 0.030302567 |
| CC | G0:0005635 | nuclear envelope                                        | -1.35461 | 0.030379624 |
| BP | G0:0009110 | vitamin biosynthetic process                            | -1.88529 | 0.030379624 |
| BP | G0:0014856 | skeletal muscle cell proliferation                      | 1.817208 | 0.030379624 |
| BP | G0:0007179 | transforming growth factor beta receptor                | 1.469562 | 0.030424087 |
| BP | G0:0014831 | gastro-intestinal system smooth muscle cell             | 1.804914 | 0.030514021 |
| BP | G0:0006360 | transcription by RNA polymerase I                       | -1.70258 | 0.030736744 |
| CC | G0:0034708 | methyltransferase complex                               | -1.60648 | 0.031086498 |
| BP | G0:0120034 | positive regulation of plasma membrane bound            | 1.605478 | 0.03109884  |
| MF | G0:0016798 | hydrolase activity, acting on glycosyl bonds            | 1.49059  | 0.031144855 |
| MF | G0:0016879 | ligase activity, forming carbon-nitrogen bonds          | -1.79412 | 0.031260324 |
| CC | G0:0000177 | cytoplasmic exosome (RNase complex)                     | -1.86116 | 0.031387721 |
| BP | G0:0042058 | regulation of epidermal growth factor receptor          | 1.655496 | 0.031509535 |
| BP | G0:2000269 | regulation of fibroblast apoptotic process              | 1.823673 | 0.031658831 |
| BP | G0:0060291 | long-term synaptic potentiation                         | 1.610359 | 0.031658831 |
| CC | G0:0005681 | spliceosomal complex                                    | -1.51864 | 0.031666844 |
| BP | G0:0008645 | hexose transmembrane transport                          | 1.558324 | 0.031694442 |
| BP | G0:0045600 | positive regulation of fat cell differentiation         | 1.69045  | 0.03172819  |
| MF | G0:0030295 | protein kinase activator activity                       | 1.608539 | 0.03186803  |
| CC | G0:1905368 | peptidase complex                                       | -1.58926 | 0.03186803  |
| BP | G0:0019439 | aromatic compound catabolic process                     | -1.38158 | 0.031989848 |
| BP | G0:0006903 | vesicle targeting                                       | 1.780807 | 0.031989848 |
| BP | G0:0000478 | endonucleolytic cleavage involved in rRNA               | -1.82709 | 0.031989848 |
| BP | G0:0000479 | endonucleolytic cleavage of tricistronic                | -1.82709 | 0.031989848 |
| MF | G0:0015605 | organophosphate ester transmembrane transport           | -1.78402 | 0.031989848 |
| MF | G0:0005546 | phosphatidylinositol-4,5-bisphosphate binding           | 1.652117 | 0.03227822  |
| BP | G0:0009220 | pyrimidine ribonucleotide biosynthetic process          | -1.78873 | 0.032435749 |
| BP | G0:0015749 | monosaccharide transmembrane transport                  | 1.549803 | 0.032435749 |
| BP | G0:0097028 | dendritic cell differentiation                          | 1.739073 | 0.032455755 |
| MF | G0:0030374 | nuclear receptor coactivator activity                   | 1.786528 | 0.03252122  |
| BP | G0:0062197 | cellular response to chemical stress                    | 1.341719 | 0.033052659 |
| CC | G0:0030880 | RNA polymerase complex                                  | -1.60617 | 0.033229747 |
| BP | G0:1901606 | alpha-amino acid catabolic process                      | -1.60328 | 0.033729792 |
| BP | G0:0016064 | immunoglobulin mediated immune response                 | -1.50515 | 0.033955086 |
| CC | G0:0000178 | exosome (RNase complex)                                 | -1.78347 | 0.033955086 |
| BP | G0:0098789 | pre-mRNA cleavage required for polyadenylation          | -1.80364 | 0.033955086 |
| BP | G0:1904385 | cellular response to angiotensin                        | 1.786981 | 0.033955086 |
| MF | G0:0003743 | translation initiation factor activity                  | -1.74651 | 0.034121181 |
| BP | G0:0007264 | small GTPase mediated signal transduction               | 1.332947 | 0.034283997 |
| BP | G0:0009148 | pyrimidine nucleoside triphosphate biosynthesis         | -1.81561 | 0.034369404 |
| BP | G0:0071897 | DNA biosynthetic process                                | -1.513   | 0.034409613 |
| BP | G0:1903307 | positive regulation of regulated secretory              | 1.695983 | 0.034555996 |
| BP | G0:0090502 | RNA phosphodiester bond hydrolysis, endonuclease        | -1.63903 | 0.034597335 |
| BP | G0:0007004 | telomere maintenance via telomerase                     | -1.66268 | 0.034660453 |
| MF | G0:0061659 | ubiquitin-like protein ligase activity                  | 1.38995  | 0.034768042 |
| BP | G0:0019724 | B cell mediated immunity                                | -1.51701 | 0.0348047   |
| BP | G0:0070391 | response to lipoteichoic acid                           | 1.826274 | 0.0348047   |
| BP | G0:0071223 | cellular response to lipoteichoic acid                  | 1.826274 | 0.0348047   |
| BP | G0:0014841 | skeletal muscle satellite cell proliferation            | 1.792325 | 0.034945564 |
| BP | G0:0061099 | negative regulation of protein tyrosine phosphorylation | 1.757328 | 0.035064647 |
| BP | G0:0002863 | positive regulation of inflammatory response            | -1.79656 | 0.03521035  |

|    |            |                                                                                                                           |          |             |
|----|------------|---------------------------------------------------------------------------------------------------------------------------|----------|-------------|
| MF | G0:0005158 | insulin receptor binding                                                                                                  | 1.77349  | 0.035214757 |
| MF | G0:0046965 | retinoid X receptor binding                                                                                               | 1.81299  | 0.035229495 |
| BP | G0:0006278 | RNA-dependent DNA biosynthetic process                                                                                    | -1.63097 | 0.035263114 |
| BP | G0:0035601 | protein deacylation                                                                                                       | 1.523181 | 0.035263114 |
| BP | G0:1990089 | response to nerve growth factor                                                                                           | 1.64633  | 0.035302259 |
| BP | G0:0002431 | Fc receptor mediated stimulatory signaling                                                                                | 1.741468 | 0.035311871 |
| BP | G0:0090022 | regulation of neutrophil chemotaxis                                                                                       | 1.746649 | 0.035392742 |
| BP | G0:0009263 | deoxyribonucleotide biosynthetic process                                                                                  | -1.84393 | 0.035462249 |
| BP | G0:0002312 | B cell activation involved in immune response                                                                             | -1.60562 | 0.035576167 |
| BP | G0:0019217 | regulation of fatty acid metabolic process                                                                                | 1.617231 | 0.035603084 |
| BP | G0:0051205 | protein insertion into membrane                                                                                           | -1.81065 | 0.035951324 |
| MF | G0:0030544 | Hsp70 protein binding                                                                                                     | -1.78199 | 0.035977685 |
| MF | G0:0016776 | phosphotransferase activity, phosphate group                                                                              | -1.8151  | 0.036116673 |
| BP | G0:0071800 | podosome assembly                                                                                                         | 1.780567 | 0.036139634 |
| CC | G0:1905354 | exoribonuclease complex                                                                                                   | -1.86197 | 0.036180572 |
| BP | G0:0031589 | cell-substrate adhesion                                                                                                   | 1.354972 | 0.036556973 |
| BP | G0:2001056 | positive regulation of cysteine-type endopeptidase activity                                                               | 1.525607 | 0.036556973 |
| BP | G0:0002694 | regulation of leukocyte activation                                                                                        | -1.33278 | 0.036556973 |
| BP | G0:0050657 | nucleic acid transport                                                                                                    | -1.51175 | 0.036556973 |
| BP | G0:0050658 | RNA transport                                                                                                             | -1.51175 | 0.036556973 |
| BP | G0:1990090 | cellular response to nerve growth factor                                                                                  | 1.621159 | 0.03659681  |
| MF | G0:0003713 | transcription coactivator activity                                                                                        | 1.388356 | 0.036636725 |
| BP | G0:0046330 | positive regulation of JNK cascade                                                                                        | 1.574503 | 0.036785933 |
| BP | G0:0045017 | glycerolipid biosynthetic process                                                                                         | 1.439723 | 0.036843406 |
| MF | G0:0019209 | kinase activator activity                                                                                                 | 1.567029 | 0.036843406 |
| BP | G0:0051385 | response to mineralocorticoid                                                                                             | -1.75594 | 0.036843406 |
| BP | G0:0090503 | RNA phosphodiester bond hydrolysis, exonuclease                                                                           | -1.75566 | 0.036843406 |
| CC | G0:0055029 | nuclear DNA-directed RNA polymerase complex                                                                               | -1.6187  | 0.03707562  |
| BP | G0:0032957 | inositol trisphosphate metabolic process                                                                                  | 1.820164 | 0.03707562  |
| BP | G0:0014909 | smooth muscle cell migration                                                                                              | 1.602209 | 0.03707562  |
| MF | G0:0016701 | oxidoreductase activity, acting on single donors with NAD, NADP, flavin, ferredoxin, or flavin mononucleotide as acceptor | 1.813266 | 0.037182894 |
| MF | G0:0004529 | exodeoxyribonuclease activity                                                                                             | -1.77066 | 0.037353764 |
| MF | G0:0016895 | exodeoxyribonuclease activity, producing 5' phosphate                                                                     | -1.77066 | 0.037353764 |
| BP | G0:0070555 | response to interleukin-1                                                                                                 | 1.493826 | 0.037452916 |
| BP | G0:0046631 | alpha-beta T cell activation                                                                                              | -1.52579 | 0.037484472 |
| BP | G0:0036258 | multivesicular body assembly                                                                                              | 1.803949 | 0.037484472 |
| MF | G0:0016765 | transferase activity, transferring alkyl groups                                                                           | -1.67666 | 0.037565056 |
| BP | G0:0046635 | positive regulation of alpha-beta T cell activation                                                                       | -1.62342 | 0.03773305  |
| BP | G0:0010721 | negative regulation of cell development                                                                                   | 1.459441 | 0.03784085  |
| CC | G0:0009897 | external side of plasma membrane                                                                                          | -1.40873 | 0.03784085  |
| BP | G0:2001236 | regulation of extrinsic apoptotic signaling pathway                                                                       | 1.489621 | 0.037883505 |
| BP | G0:0034762 | regulation of transmembrane transport                                                                                     | 1.293509 | 0.038338372 |
| BP | G0:0050856 | regulation of T cell receptor signaling pathway                                                                           | -1.75733 | 0.038338372 |
| MF | G0:0016289 | CoA hydrolase activity                                                                                                    | -1.82392 | 0.038388814 |
| MF | G0:0000149 | SNARE binding                                                                                                             | 1.510013 | 0.038527461 |
| BP | G0:0030010 | establishment of cell polarity                                                                                            | 1.491289 | 0.038953232 |
| BP | G0:1903036 | positive regulation of response to wounding                                                                               | 1.609129 | 0.039025873 |
| BP | G0:0021700 | developmental maturation                                                                                                  | 1.365273 | 0.040299356 |
| BP | G0:0043122 | regulation of I-kappaB kinase/NF-kappaB signaling pathway                                                                 | 1.403074 | 0.040299356 |
| BP | G0:0060070 | canonical Wnt signaling pathway                                                                                           | 1.366266 | 0.040369025 |
| BP | G0:0043302 | positive regulation of leukocyte degranulation                                                                            | 1.752403 | 0.040600986 |
| BP | G0:0090311 | regulation of protein deacetylation                                                                                       | 1.726982 | 0.040692926 |
| BP | G0:0016485 | protein processing                                                                                                        | 1.421868 | 0.040937534 |
| BP | G0:0046040 | IMP metabolic process                                                                                                     | -1.79555 | 0.040988333 |

|    |            |                                                                       |          |             |
|----|------------|-----------------------------------------------------------------------|----------|-------------|
| BP | G0:0150115 | cell-substrate junction organization                                  | 1.514712 | 0.041131493 |
| BP | G0:0071353 | cellular response to interleukin-4                                    | -1.71463 | 0.041131493 |
| BP | G0:0051223 | regulation of protein transport                                       | 1.323707 | 0.041131493 |
| BP | G0:0050764 | regulation of phagocytosis                                            | 1.578687 | 0.04119919  |
| BP | G0:0009163 | nucleoside biosynthetic process                                       | -1.82848 | 0.041215005 |
| BP | G0:0034404 | nucleobase-containing small molecule biosynthesis                     | -1.82848 | 0.041215005 |
| BP | G0:0070741 | response to interleukin-6                                             | 1.721947 | 0.041588102 |
| BP | G0:0071985 | multivesicular body sorting pathway                                   | 1.683465 | 0.041926947 |
| BP | G0:0071027 | nuclear RNA surveillance                                              | -1.81982 | 0.042686729 |
| BP | G0:0071028 | nuclear mRNA surveillance                                             | -1.81982 | 0.042686729 |
| BP | G0:0060964 | regulation of gene silencing by miRNA                                 | 1.714896 | 0.042760733 |
| BP | G0:0034612 | response to tumor necrosis factor                                     | 1.44698  | 0.043035579 |
| MF | G0:0002020 | protease binding                                                      | 1.475891 | 0.043121257 |
| CC | G0:0098687 | chromosomal region                                                    | -1.40082 | 0.043413381 |
| BP | G0:0046394 | carboxylic acid biosynthetic process                                  | -1.41486 | 0.043441851 |
| BP | G0:0090092 | regulation of transmembrane receptor protein tyrosine kinase activity | 1.389949 | 0.043449504 |
| BP | G0:0007611 | learning or memory                                                    | 1.405419 | 0.043449504 |
| CC | G0:1905369 | endopeptidase complex                                                 | -1.62511 | 0.043499051 |
| BP | G0:0006506 | GPI anchor biosynthetic process                                       | -1.74294 | 0.043548822 |
| BP | G0:0043393 | regulation of protein binding                                         | 1.445754 | 0.043548822 |
| BP | G0:0044403 | biological process involved in symbiotic nitrogen fixation            | 1.37701  | 0.043548822 |
| BP | G0:0045861 | negative regulation of proteolysis                                    | 1.345108 | 0.043620154 |
| BP | G0:0002697 | regulation of immune effector process                                 | 1.346466 | 0.043920692 |
| MF | G0:0003756 | protein disulfide isomerase activity                                  | -1.807   | 0.04395076  |
| CC | G0:0005847 | mRNA cleavage and polyadenylation specificity factor activity         | -1.80794 | 0.04395076  |
| MF | G0:0016864 | intramolecular oxidoreductase activity, trans                         | -1.807   | 0.04395076  |
| BP | G0:0070665 | positive regulation of leukocyte proliferation                        | -1.43727 | 0.044002567 |
| BP | G0:0048291 | isotype switching to IgG isotypes                                     | -1.78856 | 0.044006865 |
| MF | G0:0030674 | protein-macromolecule adaptor activity                                | 1.376843 | 0.044013305 |
| BP | G0:0051236 | establishment of RNA localization                                     | -1.48948 | 0.044013305 |
| BP | G0:0036037 | CD8-positive, alpha-beta T cell activation                            | -1.76876 | 0.044020057 |
| BP | G0:0051222 | positive regulation of protein transport                              | 1.393029 | 0.044138517 |
| BP | G0:0031279 | regulation of cyclase activity                                        | 1.649354 | 0.04422401  |
| BP | G0:0090141 | positive regulation of mitochondrial fission                          | -1.7867  | 0.044256933 |
| BP | G0:0045070 | positive regulation of viral genome replication                       | -1.77231 | 0.044256933 |
| BP | G0:0007040 | lysosome organization                                                 | 1.583423 | 0.044256933 |
| BP | G0:0080171 | lytic vacuole organization                                            | 1.583423 | 0.044256933 |
| MF | G0:0004683 | calmodulin-dependent protein kinase activity                          | 1.720659 | 0.044447559 |
| BP | G0:0006778 | porphyrin-containing compound metabolic process                       | -1.65274 | 0.044455271 |
| BP | G0:0106106 | cold-induced thermogenesis                                            | 1.416603 | 0.044479104 |
| BP | G0:0120161 | regulation of cold-induced thermogenesis                              | 1.416603 | 0.044479104 |
| BP | G0:0046324 | regulation of glucose import                                          | 1.628432 | 0.04461493  |
| BP | G0:0031647 | regulation of protein stability                                       | 1.34794  | 0.04461493  |
| BP | G0:0000375 | RNA splicing, via transesterification reaction                        | -1.4267  | 0.044793508 |
| BP | G0:0060419 | heart growth                                                          | 1.559458 | 0.044844899 |
| BP | G0:0098926 | postsynaptic signal transduction                                      | 1.706862 | 0.044896849 |
| BP | G0:0034122 | negative regulation of toll-like receptor signaling pathway           | 1.715021 | 0.04500708  |
| BP | G0:0042362 | fat-soluble vitamin biosynthetic process                              | -1.80728 | 0.045325682 |
| BP | G0:0099116 | tRNA 5'-end processing                                                | -1.80714 | 0.045325682 |
| BP | G0:0016053 | organic acid biosynthetic process                                     | -1.41013 | 0.045334532 |
| MF | G0:0019199 | transmembrane receptor protein kinase activity                        | 1.423682 | 0.045482314 |
| BP | G0:0099565 | chemical synaptic transmission, postsynaptic                          | 1.497963 | 0.045585085 |
| CC | G0:0098685 | Schaffer collateral - CA1 synapse                                     | 1.576732 | 0.045607751 |
| MF | G0:0043560 | insulin receptor substrate binding                                    | 1.74409  | 0.045607751 |

|    |            |                                            |          |             |
|----|------------|--------------------------------------------|----------|-------------|
| BP | G0:0019395 | fatty acid oxidation                       | -1.55268 | 0.045607751 |
| BP | G0:0055017 | cardiac muscle tissue growth               | 1.535606 | 0.045607751 |
| BP | G0:1904659 | glucose transmembrane transport            | 1.502748 | 0.045694331 |
| BP | G0:0006361 | transcription initiation from RNA polymer  | -1.7778  | 0.045943149 |
| BP | G0:0006979 | response to oxidative stress               | 1.331715 | 0.046001115 |
| MF | G0:0031435 | mitogen-activated protein kinase kinase    | 1.783879 | 0.046001115 |
| BP | G0:0043555 | regulation of translation in response to   | 1.782637 | 0.046001115 |
| BP | G0:0071025 | RNA surveillance                           | -1.78099 | 0.046244713 |
| CC | G0:0005793 | endoplasmic reticulum-Golgi intermediate   | 1.476117 | 0.046313663 |
| CC | G0:0070382 | exocytic vesicle                           | 1.399368 | 0.046424878 |
| BP | G0:0022407 | regulation of cell-cell adhesion           | -1.32701 | 0.046603438 |
| BP | G0:0000028 | ribosomal small subunit assembly           | -1.72859 | 0.046603438 |
| MF | G0:0043024 | ribosomal small subunit binding            | -1.72631 | 0.046603438 |
| BP | G0:0050728 | negative regulation of inflammatory respo  | 1.47454  | 0.046660892 |
| BP | G0:1900078 | positive regulation of cellular response   | 1.735502 | 0.046663393 |
| BP | G0:0048660 | regulation of smooth muscle cell prolifera | 1.478428 | 0.047323703 |
| BP | G0:0014812 | muscle cell migration                      | 1.622582 | 0.047323703 |
| BP | G0:0009141 | nucleoside triphosphate metabolic proces   | -1.55037 | 0.047323703 |
| BP | G0:0045619 | regulation of lymphocyte differentiation   | -1.47103 | 0.047453824 |
| BP | G0:0006605 | protein targeting                          | -1.43033 | 0.047721104 |
| BP | G0:0044706 | multi-multicellular organism process       | 1.37395  | 0.047746507 |
| BP | G0:0001522 | pseudouridine synthesis                    | -1.80174 | 0.047746507 |
| MF | G0:0009982 | pseudouridine synthase activity            | -1.80174 | 0.047746507 |
| BP | G0:0140029 | exocytic process                           | 1.605909 | 0.047835034 |
| CC | G0:0043601 | nuclear replisome                          | -1.76758 | 0.047848231 |
| BP | G0:0030098 | lymphocyte differentiation                 | -1.3608  | 0.047903314 |
| BP | G0:0140112 | extracellular vesicle biogenesis           | 1.717935 | 0.047916343 |
| BP | G0:1904356 | regulation of telomere maintenance via te  | -1.66495 | 0.047989942 |
| BP | G0:0051693 | actin filament capping                     | 1.633509 | 0.048226871 |
| BP | G0:0031640 | killing of cells of other organism         | 1.572315 | 0.048226871 |
| CC | G0:0002102 | podosome                                   | 1.707691 | 0.048526195 |
| BP | G0:0097202 | activation of cysteine-type endopeptidas   | 1.754078 | 0.048638482 |
| BP | G0:0002696 | positive regulation of leukocyte activati  | -1.39108 | 0.048638482 |
| BP | G0:0033865 | nucleoside bisphosphate metabolic proces   | -1.55025 | 0.048638482 |
| BP | G0:0033875 | ribonucleoside bisphosphate metabolic pro  | -1.55025 | 0.048638482 |
| BP | G0:0034032 | purine nucleoside bisphosphate metabolic   | -1.55025 | 0.048638482 |
| BP | G0:0009086 | methionine biosynthetic process            | -1.7631  | 0.048851496 |
| BP | G0:0016045 | detection of bacterium                     | 1.752455 | 0.049034676 |
| BP | G0:0033539 | fatty acid beta-oxidation using acyl-CoA   | -1.76934 | 0.049132526 |
| BP | G0:0035112 | genitalia morphogenesis                    | 1.776279 | 0.049322637 |
| MF | G0:0019887 | protein kinase regulator activity          | 1.445378 | 0.049452385 |
| BP | G0:1902624 | positive regulation of neutrophil migrati  | 1.751608 | 0.049620434 |
| BP | G0:0090407 | organophosphate biosynthetic process       | -1.3395  | 0.049620434 |
| CC | G0:0042405 | nuclear inclusion body                     | 1.730851 | 0.049725712 |
| BP | G0:0010939 | regulation of necrotic cell death          | 1.694343 | 0.049773996 |
| BP | G0:0001893 | maternal placenta development              | 1.667911 | 0.049773996 |
| MF | G0:1902936 | phosphatidylinositol bisphosphate bindin   | 1.569493 | 0.049773996 |
| BP | G0:0002204 | somatic recombination of immunoglobulin    | -1.67838 | 0.049773996 |
| BP | G0:0002208 | somatic diversification of immunoglobulin  | -1.67838 | 0.049773996 |
| BP | G0:0045190 | isotype switching                          | -1.67838 | 0.049773996 |
| BP | G0:0007009 | plasma membrane organization               | 1.513416 | 0.049784219 |
| BP | G0:0061760 | antifungal innate immune response          | 1.771605 | 0.049784219 |
| BP | G0:0002753 | cytoplasmic pattern recognition receptor   | 1.660377 | 0.049885398 |

| ID       | Description                                     | NES      | p. adjust   |
|----------|-------------------------------------------------|----------|-------------|
| hsa03008 | Ribosome biogenesis in eukaryotes               | -2.60742 | 1.67E-08    |
| hsa03010 | Ribosome                                        | -3.17607 | 1.67E-08    |
| hsa04062 | Chemokine signaling pathway                     | 2.068376 | 4.30E-07    |
| hsa04144 | Endocytosis                                     | 1.999805 | 4.93E-07    |
| hsa05135 | Yersinia infection                              | 2.116084 | 1.60E-06    |
| hsa04140 | Autophagy - animal                              | 2.135355 | 2.82E-06    |
| hsa05417 | Lipid and atherosclerosis                       | 1.919522 | 3.73E-06    |
| hsa05131 | Shigellosis                                     | 1.963015 | 5.31E-06    |
| hsa05130 | Pathogenic Escherichia coli infection           | 1.948429 | 5.72E-06    |
| hsa05152 | Tuberculosis                                    | 1.958181 | 5.72E-06    |
| hsa04380 | Osteoclast differentiation                      | 2.073692 | 7.59E-06    |
| hsa04666 | Fc gamma R-mediated phagocytosis                | 2.084913 | 1.41E-05    |
| hsa05132 | Salmonella infection                            | 1.848891 | 1.43E-05    |
| hsa05332 | Graft-versus-host disease                       | -2.27558 | 2.58E-05    |
| hsa04010 | MAPK signaling pathway                          | 1.744597 | 2.58E-05    |
| hsa04910 | Insulin signaling pathway                       | 1.978818 | 3.46E-05    |
| hsa04670 | Leukocyte transendothelial migration            | 1.982706 | 3.81E-05    |
| hsa05167 | Kaposi sarcoma-associated herpesvirus infection | 1.837231 | 4.25E-05    |
| hsa05330 | Allograft rejection                             | -2.23756 | 5.24E-05    |
| hsa03030 | DNA replication                                 | -2.24828 | 6.74E-05    |
| hsa04621 | NOD-like receptor signaling pathway             | 1.861818 | 7.31E-05    |
| hsa04613 | Neutrophil extracellular trap formation         | 1.929574 | 0.000108605 |
| hsa01240 | Biosynthesis of cofactors                       | -1.93385 | 0.000108605 |
| hsa05134 | Legionellosis                                   | 2.069067 | 0.00014478  |
| hsa01200 | Carbon metabolism                               | -1.93135 | 0.000241428 |
| hsa05163 | Human cytomegalovirus infection                 | 1.679353 | 0.000251503 |
| hsa04722 | Neurotrophin signaling pathway                  | 1.869587 | 0.000266966 |
| hsa04068 | FoxO signaling pathway                          | 1.807813 | 0.000529446 |
| hsa05320 | Autoimmune thyroid disease                      | -1.98978 | 0.000569291 |
| hsa05211 | Renal cell carcinoma                            | 1.981019 | 0.000656545 |
| hsa00280 | Valine, leucine and isoleucine degradation      | -1.9931  | 0.000656545 |
| hsa01230 | Biosynthesis of amino acids                     | -1.95319 | 0.000656545 |
| hsa04620 | Toll-like receptor signaling pathway            | 1.80071  | 0.000656545 |
| hsa04360 | Axon guidance                                   | 1.649339 | 0.000668843 |
| hsa03410 | Base excision repair                            | -2.03435 | 0.00077144  |
| hsa00620 | Pyruvate metabolism                             | -1.9666  | 0.000938575 |
| hsa00510 | N-Glycan biosynthesis                           | -2.01975 | 0.000953878 |
| hsa01232 | Nucleotide metabolism                           | -1.9236  | 0.001003254 |
| hsa05215 | Prostate cancer                                 | 1.843717 | 0.001223018 |
| hsa00270 | Cysteine and methionine metabolism              | -1.97534 | 0.001255089 |
| hsa00020 | Citrate cycle (TCA cycle)                       | -1.97671 | 0.001296859 |
| hsa00190 | Oxidative phosphorylation                       | -1.77951 | 0.00130223  |
| hsa04940 | Type I diabetes mellitus                        | -1.9798  | 0.00130223  |
| hsa04071 | Sphingolipid signaling pathway                  | 1.776057 | 0.001431091 |
| hsa05161 | Hepatitis B                                     | 1.702399 | 0.001457527 |
| hsa05205 | Proteoglycans in cancer                         | 1.642974 | 0.001457527 |
| hsa04612 | Antigen processing and presentation             | -1.83819 | 0.001550377 |
| hsa04146 | Peroxisome                                      | -1.83458 | 0.001598681 |
| hsa04926 | Relaxin signaling pathway                       | 1.70784  | 0.001867863 |
| hsa05340 | Primary immunodeficiency                        | -1.96591 | 0.001909709 |
| hsa04810 | Regulation of actin cytoskeleton                | 1.611408 | 0.00227271  |
| hsa05014 | Amyotrophic lateral sclerosis                   | -1.53536 | 0.00229666  |
| hsa01210 | 2-Oxocarboxylic acid metabolism                 | -1.97015 | 0.002743493 |

|                                                               |          |             |
|---------------------------------------------------------------|----------|-------------|
| hsa04935 Growth hormone synthesis, secretion and action       | 1.67491  | 0.003445845 |
| hsa05310 Asthma                                               | -1.8884  | 0.003445845 |
| hsa05020 Prion disease                                        | -1.55724 | 0.003548798 |
| hsa00230 Purine metabolism                                    | -1.66488 | 0.003874134 |
| hsa04662 B cell receptor signaling pathway                    | 1.745775 | 0.004120228 |
| hsa00630 Glyoxylate and dicarboxylate metabolism              | -1.91781 | 0.004120228 |
| hsa05220 Chronic myeloid leukemia                             | 1.696445 | 0.004229077 |
| hsa04931 Insulin resistance                                   | 1.683945 | 0.004229077 |
| hsa05100 Bacterial invasion of epithelial cells               | 1.775038 | 0.004294641 |
| hsa03420 Nucleotide excision repair                           | -1.85881 | 0.004342512 |
| hsa05012 Parkinson disease                                    | -1.55509 | 0.004865191 |
| hsa03018 RNA degradation                                      | -1.7741  | 0.005087597 |
| hsa04110 Cell cycle                                           | -1.63444 | 0.005584101 |
| hsa04510 Focal adhesion                                       | 1.523282 | 0.005667805 |
| hsa05140 Leishmaniasis                                        | 1.779401 | 0.005730375 |
| hsa04928 Parathyroid hormone synthesis, secretion and action  | 1.595994 | 0.005749578 |
| hsa04668 TNF signaling pathway                                | 1.639969 | 0.005749578 |
| hsa05142 Chagas disease                                       | 1.635852 | 0.006151579 |
| hsa04672 Intestinal immune network for IgA production         | -1.8057  | 0.006151579 |
| hsa05235 PD-L1 expression and PD-1 checkpoint pathway in canc | 1.638081 | 0.006151579 |
| hsa05322 Systemic lupus erythematosus                         | -1.80593 | 0.006151579 |
| hsa05416 Viral myocarditis                                    | -1.75682 | 0.006192817 |
| hsa05221 Acute myeloid leukemia                               | 1.742481 | 0.006726442 |
| hsa04664 Fc epsilon RI signaling pathway                      | 1.724545 | 0.006950197 |
| hsa03430 Mismatch repair                                      | -1.89187 | 0.007225348 |
| hsa04625 C-type lectin receptor signaling pathway             | 1.626186 | 0.007660931 |
| hsa05170 Human immunodeficiency virus 1 infection             | 1.508034 | 0.007660931 |
| hsa03013 Nucleocytoplasmic transport                          | -1.63539 | 0.007901943 |
| hsa04520 Adherens junction                                    | 1.719249 | 0.008239661 |
| hsa04012 ErbB signaling pathway                               | 1.635693 | 0.009328305 |
| hsa00062 Fatty acid elongation                                | -1.84424 | 0.009392366 |
| hsa00500 Starch and sucrose metabolism                        | 1.807843 | 0.009392366 |
| hsa04657 IL-17 signaling pathway                              | 1.596672 | 0.009752266 |
| hsa05214 Glioma                                               | 1.6042   | 0.012163067 |
| hsa04964 Proximal tubule bicarbonate reclamation              | -1.8272  | 0.012483731 |
| hsa03040 Spliceosome                                          | -1.57365 | 0.012947273 |
| hsa04611 Platelet activation                                  | 1.544252 | 0.013522315 |
| hsa04915 Estrogen signaling pathway                           | 1.46619  | 0.014191291 |
| hsa03020 RNA polymerase                                       | -1.80513 | 0.014287869 |
| hsa04658 Th1 and Th2 cell differentiation                     | -1.56551 | 0.014287869 |
| hsa03060 Protein export                                       | -1.73161 | 0.014287869 |
| hsa00562 Inositol phosphate metabolism                        | 1.626801 | 0.01471108  |
| hsa04330 Notch signaling pathway                              | 1.643085 | 0.01471108  |
| hsa05162 Measles                                              | 1.512134 | 0.01484314  |
| hsa03460 Fanconi anemia pathway                               | -1.70312 | 0.016383516 |
| hsa04610 Complement and coagulation cascades                  | 1.589898 | 0.016383516 |
| hsa05120 Epithelial cell signaling in Helicobacter pylori inf | 1.616525 | 0.016395365 |
| hsa05133 Pertussis                                            | 1.596499 | 0.016784772 |
| hsa04150 mTOR signaling pathway                               | 1.498761 | 0.016784772 |
| hsa05212 Pancreatic cancer                                    | 1.544841 | 0.017125664 |
| hsa04622 RIG-I-like receptor signaling pathway                | 1.601814 | 0.017870754 |
| hsa00563 Glycosylphosphatidylinositol (GPI)-anchor biosynthes | -1.71412 | 0.018352249 |
| hsa05171 Coronavirus disease - COVID-19                       | -1.40514 | 0.018466123 |
| hsa04066 HIF-1 signaling pathway                              | 1.517704 | 0.018753592 |

|                                                        |          |             |
|--------------------------------------------------------|----------|-------------|
| hsa04936 Alcoholic liver disease                       | 1.483994 | 0.018938496 |
| hsa05231 Choline metabolism in cancer                  | 1.497537 | 0.019170195 |
| hsa04210 Apoptosis                                     | 1.435798 | 0.019214748 |
| hsa05223 Non-small cell lung cancer                    | 1.580789 | 0.019214748 |
| hsa05219 Bladder cancer                                | 1.659469 | 0.019427011 |
| hsa04145 Phagosome                                     | 1.425662 | 0.019427011 |
| hsa01522 Endocrine resistance                          | 1.476741 | 0.019427011 |
| hsa04370 VEGF signaling pathway                        | 1.559494 | 0.019723832 |
| hsa05213 Endometrial cancer                            | 1.554586 | 0.020022148 |
| hsa04713 Circadian entrainment                         | 1.501002 | 0.020655921 |
| hsa05418 Fluid shear stress and atherosclerosis        | 1.419844 | 0.021679855 |
| hsa04726 Serotonergic synapse                          | 1.451655 | 0.02202587  |
| hsa04064 NF-kappa B signaling pathway                  | 1.488656 | 0.0235571   |
| hsa05160 Hepatitis C                                   | 1.421436 | 0.023570315 |
| hsa04015 Rap1 signaling pathway                        | 1.403192 | 0.023570315 |
| hsa00600 Sphingolipid metabolism                       | 1.627284 | 0.023720414 |
| hsa04070 Phosphatidylinositol signaling system         | 1.486859 | 0.023720414 |
| hsa04120 Ubiquitin mediated proteolysis                | -1.46699 | 0.025253344 |
| hsa00513 Various types of N-glycan biosynthesis        | -1.67889 | 0.025714432 |
| hsa05164 Influenza A                                   | 1.390739 | 0.026614969 |
| hsa00640 Propanoate metabolism                         | -1.60287 | 0.027674995 |
| hsa04917 Prolactin signaling pathway                   | 1.535434 | 0.027674995 |
| hsa04912 GnRH signaling pathway                        | 1.434856 | 0.028691129 |
| hsa04720 Long-term potentiation                        | 1.571626 | 0.029341071 |
| hsa05207 Chemical carcinogenesis - receptor activation | 1.394872 | 0.029341071 |
| hsa00250 Alanine, aspartate and glutamate metabolism   | -1.62295 | 0.029853713 |
| hsa00071 Fatty acid degradation                        | -1.61342 | 0.029982882 |
| hsa01521 EGFR tyrosine kinase inhibitor resistance     | 1.462491 | 0.031116511 |
| hsa04921 Oxytocin signaling pathway                    | 1.36424  | 0.032176654 |
| hsa03250 Viral life cycle - HIV-1                      | 1.539467 | 0.033026667 |
| hsa01212 Fatty acid metabolism                         | -1.52718 | 0.034123938 |
| hsa05166 Human T-cell leukemia virus 1 infection       | -1.3532  | 0.034619527 |
| hsa05016 Huntington disease                            | -1.31819 | 0.035526647 |
| hsa00970 Aminoacyl-tRNA biosynthesis                   | -1.65643 | 0.036264652 |
| hsa04932 Non-alcoholic fatty liver disease             | -1.36577 | 0.041898115 |
| hsa04919 Thyroid hormone signaling pathway             | 1.447655 | 0.041898115 |
| hsa04371 Apelin signaling pathway                      | 1.398367 | 0.041898115 |
| hsa05321 Inflammatory bowel disease                    | -1.53925 | 0.043918692 |
| hsa05202 Transcriptional misregulation in cancer       | 1.329303 | 0.044016262 |
| hsa04024 cAMP signaling pathway                        | 1.290588 | 0.045217232 |
| hsa05210 Colorectal cancer                             | 1.40134  | 0.048032531 |
| hsa00450 Selenocompound metabolism                     | -1.55318 | 0.049116386 |



Supplementary Table 2: GSEA analysis of TGFBR3

| ONTOLOGY ID | Description                                                  | NES      | p. adjust |
|-------------|--------------------------------------------------------------|----------|-----------|
| CC          | G0:00003:organellar ribosome                                 | 2.612293 | 2.85E-08  |
| BP          | G0:00021:cytoplasmic translation                             | 2.629894 | 2.85E-08  |
| MF          | G0:00037:structural constituent of ribosome                  | 2.680175 | 2.85E-08  |
| CC          | G0:00057:mitochondrial inner membrane                        | 2.071033 | 2.85E-08  |
| CC          | G0:00057:mitochondrial matrix                                | 2.298291 | 2.85E-08  |
| CC          | G0:00057:mitochondrial ribosome                              | 2.612293 | 2.85E-08  |
| CC          | G0:00058:ribosome                                            | 2.713538 | 2.85E-08  |
| BP          | G0:00063:rRNA processing                                     | 2.499351 | 2.85E-08  |
| BP          | G0:00063:tRNA metabolic process                              | 2.413463 | 2.85E-08  |
| BP          | G0:00064:translation                                         | 2.277351 | 2.85E-08  |
| BP          | G0:00094:RNA modification                                    | 2.426652 | 2.85E-08  |
| CC          | G0:00159:large ribosomal subunit                             | 2.519822 | 2.85E-08  |
| BP          | G0:00160:rRNA metabolic process                              | 2.422192 | 2.85E-08  |
| CC          | G0:00198:organelle inner membrane                            | 1.974234 | 2.85E-08  |
| BP          | G0:00226:ribonucleoprotein complex biogenesis                | 2.432245 | 2.85E-08  |
| CC          | G0:00226:cytosolic ribosome                                  | 2.473463 | 2.85E-08  |
| CC          | G0:00306:secretory granule membrane                          | -2.55935 | 2.85E-08  |
| BP          | G0:00344:ncRNA processing                                    | 2.561562 | 2.85E-08  |
| BP          | G0:00346:ncRNA metabolic process                             | 2.499737 | 2.85E-08  |
| BP          | G0:00422:ribosome biogenesis                                 | 2.5093   | 2.85E-08  |
| CC          | G0:00425:specific granule                                    | -2.74916 | 2.85E-08  |
| CC          | G0:00443:ribosomal subunit                                   | 2.764404 | 2.85E-08  |
| CC          | G0:00708:tertiary granule                                    | -2.59352 | 2.85E-08  |
| CC          | G0:00987:mitochondrial protein-containing complex            | 2.408812 | 2.85E-08  |
| BP          | G0:01400:mitochondrial gene expression                       | 2.468948 | 2.85E-08  |
| MF          | G0:01400:catalytic activity, acting on RNA                   | 2.19432  | 2.85E-08  |
| MF          | G0:01406:catalytic activity, acting on a nucleic acid        | 2.221907 | 2.85E-08  |
| CC          | G0:00159:small ribosomal subunit                             | 2.448753 | 6.44E-08  |
| CC          | G0:00355:specific granule membrane                           | -2.51752 | 9.37E-08  |
| BP          | G0:00325:mitochondrial translation                           | 2.458651 | 1.63E-07  |
| MF          | G0:00167:transferase activity, transferring one-carbon group | 2.165742 | 1.63E-07  |
| CC          | G0:19047:tertiary granule lumen                              | -2.62582 | 2.79E-07  |
| MF          | G0:00081:methyltransferase activity                          | 2.168171 | 5.25E-07  |
| BP          | G0:00064:tRNA modification                                   | 2.408459 | 7.05E-07  |
| CC          | G0:00057:primary lysosome                                    | -2.16915 | 9.50E-07  |
| CC          | G0:00425:azurophil granule                                   | -2.16915 | 9.50E-07  |
| MF          | G0:01401:catalytic activity, acting on a tRNA                | 2.322695 | 1.04E-06  |
| BP          | G0:00080:tRNA processing                                     | 2.281759 | 1.11E-06  |
| MF          | G0:00037:mRNA binding                                        | 1.935886 | 3.57E-06  |
| CC          | G0:00347:secretory granule lumen                             | -1.82542 | 4.64E-06  |
| CC          | G0:00355:specific granule lumen                              | -2.42031 | 7.58E-06  |
| BP          | G0:00160:mRNA metabolic process                              | 1.694913 | 8.70E-06  |
| MF          | G0:01406:ATP-dependent activity                              | 1.728896 | 1.05E-05  |
| MF          | G0:00081:RNA methyltransferase activity                      | 2.391205 | 1.05E-05  |
| BP          | G0:00322:methylation                                         | 1.870259 | 1.18E-05  |
| CC          | G0:00602:cytoplasmic vesicle lumen                           | -1.80468 | 1.26E-05  |
| CC          | G0:00319:vesicle lumen                                       | -1.79602 | 1.26E-05  |
| CC          | G0:00226:cytosolic large ribosomal subunit                   | 2.243658 | 2.19E-05  |
| BP          | G0:19011:carbohydrate derivative biosynthetic process        | 1.678136 | 2.28E-05  |
| CC          | G0:01010:ficolin-1-rich granule                              | -1.97819 | 2.43E-05  |
| BP          | G0:00015:RNA methylation                                     | 2.301766 | 2.50E-05  |

|    |          |                                                           |          |          |
|----|----------|-----------------------------------------------------------|----------|----------|
| BP | G0:00064 | regulation of translation                                 | 1.783519 | 4.28E-05 |
| BP | G0:00434 | macromolecule methylation                                 | 1.881515 | 4.44E-05 |
| CC | G0:00003 | organellar large ribosomal subunit                        | 2.234325 | 4.47E-05 |
| CC | G0:00057 | (mitochondrial large ribosomal subunit                    | 2.234325 | 4.47E-05 |
| MF | G0:00087 | S-adenosylmethionine-dependent methyltransferase activity | 2.100635 | 4.91E-05 |
| BP | G0:00606 | regulation of vesicle-mediated transport                  | -1.5653  | 5.59E-05 |
| BP | G0:00226 | ribonucleoprotein complex assembly                        | 2.010215 | 6.05E-05 |
| BP | G0:00106 | (posttranscriptional regulation of gene expression        | 1.701948 | 6.05E-05 |
| MF | G0:00167 | nucleotidyltransferase activity                           | 2.059973 | 9.81E-05 |
| BP | G0:00069 | phagocytosis                                              | -1.82026 | 0.000106 |
| BP | G0:00342 | regulation of cellular amide metabolic process            | 1.693855 | 0.000116 |
| BP | G0:00718 | ribonucleoprotein complex subunit organization            | 1.966981 | 0.000126 |
| MF | G0:00043 | helicase activity                                         | 1.965998 | 0.000129 |
| CC | G0:00453 | phagocytic vesicle                                        | -1.96583 | 0.000145 |
| MF | G0:00168 | ATP hydrolysis activity                                   | 1.804965 | 0.000149 |
| MF | G0:01400 | catalytic activity, acting on DNA                         | 1.860155 | 0.000163 |
| BP | G0:00063 | mRNA processing                                           | 1.732871 | 0.000177 |
| BP | G0:00422 | ribosomal large subunit biogenesis                        | 2.160773 | 0.000181 |
| CC | G0:00708 | tertiary granule membrane                                 | -2.18095 | 0.000273 |
| BP | G0:00313 | regulation of protein ubiquitination                      | 1.834652 | 0.000273 |
| BP | G0:00062 | DNA repair                                                | 1.655212 | 0.00028  |
| BP | G0:00083 | RNA splicing                                              | 1.717709 | 0.000288 |
| BP | G0:00422 | ribosomal small subunit biogenesis                        | 2.116762 | 0.000303 |
| MF | G0:00198 | rRNA binding                                              | 2.127536 | 0.000316 |
| BP | G0:00003 | RNA splicing, via transesterification reactions           | 1.801559 | 0.000322 |
| BP | G0:00003 | RNA splicing, via transesterification reactions with      | 1.77887  | 0.000379 |
| BP | G0:00003 | mRNA splicing, via spliceosome                            | 1.77887  | 0.000379 |
| CC | G0:00616 | transferase complex, transferring phosphorus-containing   | 1.782696 | 0.000468 |
| CC | G0:00003 | organellar small ribosomal subunit                        | 2.168346 | 0.000468 |
| CC | G0:00057 | (mitochondrial small ribosomal subunit                    | 2.168346 | 0.000468 |
| BP | G0:00326 | interleukin-6 production                                  | -1.90819 | 0.00057  |
| BP | G0:00326 | regulation of interleukin-6 production                    | -1.90819 | 0.00057  |
| BP | G0:00324 | response to lipopolysaccharide                            | -1.61138 | 0.00057  |
| CC | G0:00057 | early endosome                                            | -1.58319 | 0.00057  |
| MF | G0:00081 | tRNA methyltransferase activity                           | 2.175989 | 0.000597 |
| BP | G0:00009 | mitochondrial RNA metabolic process                       | 2.219936 | 0.000701 |
| MF | G0:00080 | ATP-dependent activity, acting on DNA                     | 1.956604 | 0.000701 |
| BP | G0:00725 | establishment of protein localization to organelle        | 1.630398 | 0.000701 |
| BP | G0:00703 | response to lipoteichoic acid                             | -2.27748 | 0.000701 |
| BP | G0:00712 | cellular response to lipoteichoic acid                    | -2.27748 | 0.000701 |
| CC | G0:00301 | transport vesicle                                         | -1.55181 | 0.00074  |
| BP | G0:00507 | positive regulation of inflammatory response              | -1.85845 | 0.00074  |
| MF | G0:00037 | double-stranded RNA binding                               | 2.054628 | 0.000903 |
| CC | G0:00100 | endosome membrane                                         | -1.49953 | 0.000984 |
| BP | G0:00022 | response to molecule of bacterial origin                  | -1.61742 | 0.001111 |
| MF | G0:00353 | Toll-like receptor binding                                | -2.27457 | 0.001132 |
| CC | G0:01010 | (ficolin-1-rich granule membrane                          | -2.15351 | 0.001132 |
| CC | G0:00056 | spliceosomal complex                                      | 1.797557 | 0.001138 |
| CC | G0:00226 | cytosolic small ribosomal subunit                         | 2.107901 | 0.001211 |
| BP | G0:00311 | RNA 3'-end processing                                     | 1.972092 | 0.00127  |
| BP | G0:00309 | positive regulation of vascular endothelial growth factor | -2.29389 | 0.00127  |
| CC | G0:00058 | centrosome                                                | 1.559342 | 0.00127  |
| BP | G0:00062 | DNA replication                                           | 1.70252  | 0.00127  |
| BP | G0:00000 | ribosomal subunit export from nucleus                     | 2.078593 | 0.00127  |

|    |          |                                                             |           |          |
|----|----------|-------------------------------------------------------------|-----------|----------|
| BP | G0:00337 | ribosome localization                                       | 2.078593  | 0.00127  |
| CC | G0:00308 | RNA polymerase complex                                      | 1.922264  | 0.001293 |
| BP | G0:00327 | positive regulation of interleukin-6 production             | -1.98773  | 0.001456 |
| CC | G0:00550 | nuclear DNA-directed RNA polymerase complex                 | 1.975089  | 0.001515 |
| BP | G0:00070 | mitochondrion organization                                  | 1.592448  | 0.001654 |
| BP | G0:00064 | RNA localization                                            | 1.79124   | 0.001654 |
| BP | G0:00192 | cytokine-mediated signaling pathway                         | -1.50302  | 0.001686 |
| BP | G0:19046 | negative regulation of ubiquitin protein ligase activity    | 2.090477  | 0.001796 |
| BP | G0:00304 | tRNA methylation                                            | 2.06775   | 0.001831 |
| MF | G0:00430 | ribonucleoprotein complex binding                           | 1.852943  | 0.00186  |
| BP | G0:00309 | regulation of vascular endothelial growth factor production | -2.22968  | 0.001875 |
| CC | G0:00004 | DNA-directed RNA polymerase complex                         | 1.967831  | 0.002088 |
| CC | G0:00355 | azurophil granule membrane                                  | -2.09225  | 0.002088 |
| BP | G0:20003 | regulation of reactive oxygen species metabolic process     | -1.75832  | 0.002088 |
| BP | G0:00510 | positive regulation of DNA metabolic process                | 1.728517  | 0.002142 |
| BP | G0:00507 | regulation of inflammatory response                         | -1.57903  | 0.002187 |
| MF | G0:00036 | single-stranded DNA binding                                 | 1.835602  | 0.002329 |
| MF | G0:00381 | pattern recognition receptor activity                       | -2.25055  | 0.002353 |
| CC | G0:00306 | phagocytic vesicle membrane                                 | -1.97252  | 0.002389 |
| CC | G0:00988 | inner mitochondrial membrane protein complex                | 1.827278  | 0.002601 |
| MF | G0:00000 | tRNA binding                                                | 1.994499  | 0.002777 |
| BP | G0:19033 | regulation of protein modification by small protein         | 1.706116  | 0.002818 |
| MF | G0:00038 | DNA-directed 5'-3' RNA polymerase activity                  | 2.059923  | 0.002818 |
| BP | G0:00508 | antigen receptor-mediated signaling pathway                 | 1.737762  | 0.002832 |
| BP | G0:00322 | telomere organization                                       | 1.826071  | 0.002832 |
| CC | G0:00057 | mitochondrial outer membrane                                | 1.710937  | 0.002968 |
| BP | G0:00711 | DNA conformation change                                     | 1.732575  | 0.002968 |
| CC | G0:00306 | preribosome                                                 | 1.973982  | 0.003069 |
| BP | G0:00525 | regulation of peptidase activity                            | -1.48542  | 0.003254 |
| BP | G0:00718 | protein-DNA complex subunit organization                    | 1.737036  | 0.003331 |
| BP | G0:00509 | detection of stimulus involved in sensory perception        | -1.46164  | 0.003344 |
| BP | G0:00070 | vacuole organization                                        | -1.71334  | 0.003405 |
| BP | G0:00714 | rRNA-containing ribonucleoprotein complex export            | 12.044916 | 0.003448 |
| CC | G0:00058 | polysome                                                    | 1.948621  | 0.003448 |
| BP | G0:00327 | positive regulation of interleukin-8 production             | -2.024    | 0.003481 |
| CC | G0:00057 | vacuolar membrane                                           | -1.49543  | 0.003554 |
| BP | G0:00508 | positive regulation of T cell activation                    | 1.655404  | 0.003796 |
| BP | G0:00453 | cellular respiration                                        | 1.679277  | 0.003872 |
| MF | G0:00340 | 5'-3' RNA polymerase activity                               | 2.078574  | 0.003872 |
| MF | G0:00977 | RNA polymerase activity                                     | 2.078574  | 0.003872 |
| BP | G0:00622 | regulation of pattern recognition receptor signaling        | -1.86624  | 0.003872 |
| MF | G0:00016 | ATPase activator activity                                   | 2.079943  | 0.003872 |
| CC | G0:00301 | endocytic vesicle                                           | -1.53223  | 0.003937 |
| BP | G0:00007 | telomere maintenance                                        | 1.825963  | 0.004001 |
| BP | G0:00068 | mitochondrial transport                                     | 1.68338   | 0.004076 |
| BP | G0:00725 | reactive oxygen species metabolic process                   | -1.60316  | 0.004163 |
| BP | G0:00525 | regulation of endopeptidase activity                        | -1.46634  | 0.004616 |
| CC | G0:01201 | Sm-like protein family complex                              | 1.902235  | 0.004616 |
| BP | G0:00326 | regulation of interleukin-8 production                      | -1.88631  | 0.004622 |
| BP | G0:00022 | myeloid leukocyte activation                                | -1.58348  | 0.004761 |
| BP | G0:00422 | ribosome assembly                                           | 1.948245  | 0.00487  |
| BP | G0:00508 | T cell receptor signaling pathway                           | 1.794581  | 0.004912 |
| BP | G0:00650 | protein-DNA complex assembly                                | 1.832353  | 0.00492  |
| BP | G0:00326 | interleukin-8 production                                    | -1.87178  | 0.00492  |

|    |                                                                           |          |          |
|----|---------------------------------------------------------------------------|----------|----------|
| BP | G0:00436:ncRNA 3'-end processing                                          | 2.006465 | 0.005348 |
| CC | G0:00056:replication fork                                                 | 1.97868  | 0.005372 |
| BP | G0:00025:acute inflammatory response                                      | -1.77714 | 0.005398 |
| BP | G0:19033:regulation of cellular protein catabolic process                 | 1.615432 | 0.005541 |
| BP | G0:00510:positive regulation of NF-kappaB transcription factor activity   | -1.66999 | 0.005616 |
| BP | G0:00457:positive regulation of translation                               | 1.803493 | 0.005627 |
| BP | G0:00161:endosomal transport                                              | -1.60755 | 0.005663 |
| BP | G0:19035:regulation of secretion by cell                                  | -1.39803 | 0.005663 |
| BP | G0:00160:carbohydrate catabolic process                                   | -1.66724 | 0.005663 |
| CC | G0:00347:methyltransferase complex                                        | 1.841781 | 0.005847 |
| BP | G0:00063:DNA recombination                                                | 1.632436 | 0.005859 |
| BP | G0:00430:amino acid activation                                            | 2.012728 | 0.006088 |
| BP | G0:00063:chromatin organization                                           | 1.549482 | 0.006149 |
| BP | G0:00325:DNA duplex unwinding                                             | 1.844246 | 0.006443 |
| CC | G0:00056:RNA polymerase III complex                                       | 2.012854 | 0.006443 |
| BP | G0:00434:positive regulation of MAPK cascade                              | -1.41635 | 0.006489 |
| BP | G0:00300:lymphocyte differentiation                                       | 1.549613 | 0.006677 |
| CC | G0:00057:lysosomal membrane                                               | -1.5024  | 0.006677 |
| CC | G0:00988:lytic vacuole membrane                                           | -1.5024  | 0.006677 |
| BP | G0:00069:acute-phase response                                             | -1.9885  | 0.006894 |
| BP | G0:00062:DNA-dependent DNA replication                                    | 1.75562  | 0.007021 |
| BP | G0:00096:response to wounding                                             | -1.37799 | 0.007021 |
| BP | G0:00091:purine nucleobase biosynthetic process                           | 1.949258 | 0.007058 |
| BP | G0:00027:positive regulation of natural killer cell mediated cytotoxicity | 1.948803 | 0.007317 |
| BP | G0:00063:transcription by RNA polymerase III                              | 1.956057 | 0.007327 |
| BP | G0:00346:nucleobase-containing compound catabolic process                 | 1.526104 | 0.007342 |
| BP | G0:00711:ribonucleoprotein complex localization                           | 1.904191 | 0.007401 |
| BP | G0:00427:defense response to bacterium                                    | -1.50915 | 0.00745  |
| MF | G0:00170:structural constituent of nuclear pore                           | 2.028302 | 0.007508 |
| BP | G0:20003:positive regulation of reactive oxygen species metabolism        | -1.91775 | 0.007597 |
| BP | G0:00108:telomere maintenance via telomere lengthening                    | 1.856562 | 0.008063 |
| MF | G0:00081:N-methyltransferase activity                                     | 1.823995 | 0.008187 |
| CC | G0:00150:Cajal body                                                       | 1.922828 | 0.008187 |
| BP | G0:00170:protein import                                                   | 1.657988 | 0.008211 |
| BP | G0:00508:regulation of T cell activation                                  | 1.561714 | 0.008276 |
| BP | G0:00510:regulation of DNA metabolic process                              | 1.552138 | 0.008649 |
| BP | G0:00304:maturation of SSU-rRNA                                           | 1.961566 | 0.008922 |
| BP | G0:00512:positive regulation of lymphocyte activation                     | 1.532842 | 0.009302 |
| BP | G0:00158:peptide transport                                                | -1.5617  | 0.009539 |
| BP | G0:20005:positive regulation of DNA biosynthetic process                  | 1.854199 | 0.009539 |
| CC | G0:00319:organelle outer membrane                                         | 1.645768 | 0.009539 |
| BP | G0:00400:negative regulation of multicellular organism growth             | 1.91868  | 0.010148 |
| BP | G0:00165:histone modification                                             | 1.511384 | 0.010333 |
| MF | G0:01406:ATP-dependent chromatin remodeler activity                       | 1.971687 | 0.01035  |
| BP | G0:00001:rRNA modification                                                | 1.966769 | 0.01035  |
| BP | G0:00447:cell cycle phase transition                                      | 1.489067 | 0.010456 |
| BP | G0:00022:pattern recognition receptor signaling pathway                   | -1.65124 | 0.010466 |
| BP | G0:00162:iron-sulfur cluster assembly                                     | 1.989298 | 0.010476 |
| BP | G0:00311:metallo-sulfur cluster assembly                                  | 1.989298 | 0.010476 |
| BP | G0:00428:amide transport                                                  | -1.50396 | 0.010546 |
| BP | G0:00427:DNA damage response, detection of DNA damage                     | 1.957143 | 0.010918 |
| CC | G0:00198:outer membrane                                                   | 1.660674 | 0.010918 |
| BP | G0:19030:positive regulation of leukocyte cell-cell adhesion              | 1.584474 | 0.010952 |
| CC | G0:19048:ficolin-1-rich granule lumen                                     | -1.63642 | 0.010985 |

|    |                                                                                       |          |          |
|----|---------------------------------------------------------------------------------------|----------|----------|
| BP | G0:00712:cellular response to molecule of bacterial origin                            | -1.59154 | 0.011115 |
| BP | G0:00066:protein targeting                                                            | 1.556152 | 0.011271 |
| MF | G0:00046:protein serine/threonine kinase activity                                     | -1.43398 | 0.011314 |
| MF | G0:00706:proteasome binding                                                           | 1.95494  | 0.011314 |
| BP | G0:00021:cytoplasmic translational initiation                                         | 1.957502 | 0.011314 |
| MF | G0:00170:snRNA binding                                                                | 1.957708 | 0.011314 |
| BP | G0:00301:water homeostasis                                                            | -1.8561  | 0.011314 |
| BP | G0:00906:RNA localization to Cajal body                                               | 1.945722 | 0.011314 |
| BP | G0:00906:telomerase RNA localization to Cajal body                                    | 1.945722 | 0.011314 |
| BP | G0:00906:telomerase RNA localization                                                  | 1.945722 | 0.011314 |
| BP | G0:00906:RNA localization to nucleus                                                  | 1.945722 | 0.011314 |
| BP | G0:19048:regulation of telomerase RNA localization to Cajal body                      | 1.945722 | 0.011314 |
| BP | G0:00032:ventricular septum development                                               | 1.889372 | 0.011314 |
| BP | G0:00071:leukocyte cell-cell adhesion                                                 | 1.509629 | 0.011314 |
| CC | G0:00986:chromosomal region                                                           | 1.539158 | 0.01165  |
| CC | G0:00975:spliceosomal snRNP complex                                                   | 1.826787 | 0.011727 |
| BP | G0:00059:monosaccharide metabolic process                                             | -1.51431 | 0.011781 |
| BP | G0:00065:cellular amino acid metabolic process                                        | 1.587605 | 0.011982 |
| BP | G0:00066:acyl-CoA metabolic process                                                   | 1.771238 | 0.012483 |
| BP | G0:00353:thioester metabolic process                                                  | 1.771238 | 0.012483 |
| BP | G0:00069:autophagy                                                                    | -1.387   | 0.012802 |
| BP | G0:00619:process utilizing autophagic mechanism                                       | -1.387   | 0.012802 |
| BP | G0:19030:regulation of leukocyte cell-cell adhesion                                   | 1.533208 | 0.012802 |
| MF | G0:00046:protein kinase activity                                                      | -1.34728 | 0.012832 |
| BP | G0:00509:leukocyte migration                                                          | -1.39197 | 0.012923 |
| BP | G0:00466:alpha-beta T cell activation                                                 | 1.667162 | 0.013309 |
| BP | G0:00714:ribonucleoprotein complex export from nucleus                                | 1.871443 | 0.013398 |
| BP | G0:19035:positive regulation of tumor necrosis factor superfamily 1 signaling pathway | -1.66652 | 0.01357  |
| BP | G0:00465:negative regulation of viral entry into host cell                            | -2.07407 | 0.01357  |
| BP | G0:00182:peptidyl-lysine modification                                                 | 1.52701  | 0.01357  |
| BP | G0:00461:purine ribonucleoside metabolic process                                      | 1.894182 | 0.013612 |
| BP | G0:00712:cellular response to biotic stimulus                                         | -1.51953 | 0.013612 |
| BP | G0:00025:myeloid leukocyte differentiation                                            | -1.50593 | 0.013612 |
| BP | G0:00703:regulation of ERK1 and ERK2 cascade                                          | -1.45324 | 0.013612 |
| BP | G0:01200:plasma membrane bounded cell projection assembly                             | 1.493475 | 0.013612 |
| BP | G0:00009:mitochondrial RNA processing                                                 | 1.936073 | 0.013612 |
| CC | G0:00166:PML body                                                                     | -1.66497 | 0.013963 |
| BP | G0:00457:respiratory burst                                                            | -2.01036 | 0.014232 |
| BP | G0:20000:regulation of ubiquitin-dependent protein catabolism                         | 1.656666 | 0.014233 |
| BP | G0:00511:nuclear export                                                               | 1.696931 | 0.014241 |
| BP | G0:00015:pseudouridine synthesis                                                      | 1.92872  | 0.014301 |
| MF | G0:00099:pseudouridine synthase activity                                              | 1.92872  | 0.014301 |
| BP | G0:00300:lamellipodium assembly                                                       | 1.768526 | 0.014301 |
| BP | G0:00466:alpha-beta T cell differentiation                                            | 1.689557 | 0.014613 |
| BP | G0:00323:DNA geometric change                                                         | 1.778282 | 0.014862 |
| BP | G0:00346:response to tumor necrosis factor                                            | -1.50653 | 0.014862 |
| BP | G0:00068:receptor-mediated endocytosis                                                | -1.49335 | 0.014903 |
| BP | G0:19030:regulation of proteolysis involved in cellular protein catabolism            | 1.608829 | 0.015195 |
| BP | G0:00712:cellular response to lipopolysaccharide                                      | -1.56296 | 0.015282 |
| CC | G0:00057:late endosome                                                                | -1.51674 | 0.015581 |
| BP | G0:00430:tRNA aminoacylation                                                          | 1.949178 | 0.015581 |
| BP | G0:00459:positive regulation of natural killer cell mediated cytotoxicity             | 1.932547 | 0.015746 |
| BP | G0:00090:aerobic respiration                                                          | 1.656183 | 0.015746 |
| BP | G0:00070:vacuolar transport                                                           | -1.63227 | 0.015746 |

|    |                                                             |          |          |
|----|-------------------------------------------------------------|----------|----------|
| BP | G0:00342:negative regulation of cellular amide metabolic p  | 1.623982 | 0.015787 |
| BP | G0:00725:purine-containing compound biosynthetic process    | 1.651646 | 0.016067 |
| MF | G0:00900:translation regulator activity, nucleic acid bind  | 1.770518 | 0.016067 |
| BP | G0:00985:detection of external biotic stimulus              | -2.01876 | 0.016088 |
| BP | G0:00650:intracellular protein transmembrane transport      | 1.834087 | 0.016103 |
| BP | G0:00300:cell projection assembly                           | 1.457101 | 0.016136 |
| BP | G0:00027:regulation of peptide secretion                    | -1.46359 | 0.016832 |
| CC | G0:00355:azurophil granule lumen                            | -1.7701  | 0.016832 |
| BP | G0:00064:translational initiation                           | 1.723199 | 0.016859 |
| CC | G0:00057:vacuolar lumen                                     | -1.56988 | 0.017122 |
| BP | G0:00381:ERBB signaling pathway                             | -1.61864 | 0.01754  |
| BP | G0:00027:peptide secretion                                  | -1.50111 | 0.017649 |
| BP | G0:00070:telomere maintenance via telomerase                | 1.799078 | 0.017711 |
| BP | G0:00302:T cell differentiation                             | 1.53883  | 0.017714 |
| MF | G0:00081:translation factor activity, RNA binding           | 1.783448 | 0.017714 |
| BP | G0:00071:epidermal growth factor receptor signaling pathway | -1.62533 | 0.017738 |
| BP | G0:00550:nucleobase-containing small molecule metabolic pro | 1.425079 | 0.017747 |
| BP | G0:00096:response to mechanical stimulus                    | -1.50232 | 0.017747 |
| BP | G0:00076:sensory perception of chemical stimulus            | -1.35773 | 0.017747 |
| BP | G0:00061:mitochondrial electron transport, NADH to ubiquin  | 1.86252  | 0.017747 |
| BP | G0:00027:immune response-regulating cell surface receptor   | 1.548283 | 0.017863 |
| BP | G0:00102:NADH dehydrogenase complex assembly                | 1.84833  | 0.017871 |
| BP | G0:00329:mitochondrial respiratory chain complex I assembly | 1.84833  | 0.017871 |
| MF | G0:00515:iron-sulfur cluster binding                        | 1.794784 | 0.01803  |
| MF | G0:00515:metal cluster binding                              | 1.794784 | 0.01803  |
| CC | G0:00427:polysomal ribosome                                 | 1.86902  | 0.018318 |
| BP | G0:00062:RNA-dependent DNA biosynthetic process             | 1.742375 | 0.018469 |
| BP | G0:00621:regulation of mitochondrial gene expression        | 1.854891 | 0.018573 |
| BP | G0:00427:ATP synthesis coupled electron transport           | 1.75028  | 0.018624 |
| BP | G0:00427:mitochondrial ATP synthesis coupled electron trans | 1.75028  | 0.018624 |
| MF | G0:00048:aminoacyl-tRNA ligase activity                     | 1.914745 | 0.018979 |
| BP | G0:00064:tRNA aminoacylation for protein translation        | 1.914745 | 0.018979 |
| MF | G0:00168:ligase activity, forming carbon-oxygen bonds       | 1.914745 | 0.018979 |
| BP | G0:00064:protein folding                                    | 1.577543 | 0.018979 |
| BP | G0:00330:regulation of chromosome organization              | 1.623186 | 0.018979 |
| MF | G0:00510:chaperone binding                                  | 1.692075 | 0.018979 |
| BP | G0:00717:tumor necrosis factor superfamily cytokine produc  | -1.55685 | 0.018979 |
| BP | G0:19035:regulation of tumor necrosis factor superfamily cy | -1.55685 | 0.018979 |
| BP | G0:00514:regulation of ubiquitin-protein transferase activ  | 1.803547 | 0.019046 |
| BP | G0:00095:detection of chemical stimulus                     | -1.36592 | 0.019046 |
| BP | G0:00508:protein stabilization                              | 1.577496 | 0.019161 |
| BP | G0:00509:detection of chemical stimulus involved in sensory | -1.38313 | 0.019551 |
| BP | G0:00380:NIK/NF-kappaB signaling                            | -1.59408 | 0.019551 |
| BP | G0:00069:nucleocytoplasmic transport                        | 1.515921 | 0.019551 |
| BP | G0:00511:nuclear transport                                  | 1.515921 | 0.019551 |
| BP | G0:00096:response to fungus                                 | -1.79601 | 0.019598 |
| BP | G0:00301:extracellular matrix organization                  | -1.43484 | 0.019646 |
| BP | G0:00611:regulation of proteasomal protein catabolic proces | 1.616988 | 0.019679 |
| BP | G0:00326:interleukin-1 production                           | -1.61639 | 0.019805 |
| BP | G0:00326:regulation of interleukin-1 production             | -1.61639 | 0.019805 |
| BP | G0:00511:glucose 6-phosphate metabolic process              | -2.04069 | 0.019901 |
| BP | G0:00421:T cell activation                                  | 1.420223 | 0.019901 |
| BP | G0:00975:lamellipodium organization                         | 1.729934 | 0.019911 |
| BP | G0:00702:necrotic cell death                                | -1.83013 | 0.020196 |

|    |          |                                                                         |          |          |
|----|----------|-------------------------------------------------------------------------|----------|----------|
| MF | G0:00451 | translation regulator activity                                          | 1.696708 | 0.020567 |
| BP | G0:00066 | NLS-bearing protein import into nucleus                                 | 1.920498 | 0.020784 |
| BP | G0:00321 | negative regulation of response to external stimulus                    | -1.38472 | 0.020784 |
| BP | G0:00159 | nucleobase-containing compound transport                                | 1.568916 | 0.020784 |
| MF | G0:00423 | histone binding                                                         | 1.574508 | 0.020861 |
| BP | G0:00447 | mitotic cell cycle phase transition                                     | 1.474571 | 0.020862 |
| BP | G0:00160 | snRNA metabolic process                                                 | 1.845707 | 0.020869 |
| BP | G0:00615 | macrophage proliferation                                                | -1.98702 | 0.021264 |
| BP | G0:20000 | negative regulation of ubiquitin-dependent protein catabolic process    | 1.865444 | 0.021264 |
| BP | G0:00713 | cellular response to tumor necrosis factor                              | -1.46972 | 0.021264 |
| BP | G0:00703 | ERK1 and ERK2 cascade                                                   | -1.43106 | 0.021376 |
| BP | G0:00425 | superoxide anion generation                                             | -1.93079 | 0.021386 |
| BP | G0:00109 | positive regulation of peptidase activity                               | -1.50616 | 0.021882 |
| BP | G0:00314 | regulation of mRNA 3'-end processing                                    | 1.885433 | 0.021882 |
| BP | G0:00510 | positive regulation of secretion                                        | -1.4294  | 0.021882 |
| BP | G0:00076 | sensory perception of smell                                             | -1.37994 | 0.021882 |
| BP | G0:00068 | exocytosis                                                              | -1.4042  | 0.021882 |
| BP | G0:00313 | positive regulation of protein ubiquitination                           | 1.650307 | 0.021882 |
| BP | G0:00091 | glycoprotein biosynthetic process                                       | 1.467248 | 0.022036 |
| CC | G0:00002 | nuclear chromosome                                                      | 1.618597 | 0.022095 |
| BP | G0:00461 | nucleobase biosynthetic process                                         | 1.873925 | 0.022095 |
| BP | G0:00229 | respiratory electron transport chain                                    | 1.713405 | 0.022268 |
| BP | G0:00025 | production of molecular mediator involved in inflammation               | -1.69575 | 0.022762 |
| BP | G0:00322 | positive regulation of telomere maintenance                             | 1.838589 | 0.022957 |
| MF | G0:01063 | protein serine kinase activity                                          | -1.37396 | 0.022957 |
| BP | G0:00509 | detection of chemical stimulus involved in sensory perception of smell  | -1.38971 | 0.022957 |
| BP | G0:00455 | regulation of T cell differentiation                                    | 1.599022 | 0.022957 |
| BP | G0:00064 | RNA catabolic process                                                   | 1.54591  | 0.022957 |
| BP | G0:00109 | regulation of necrotic cell death                                       | -1.93436 | 0.022957 |
| BP | G0:00066 | protein targeting to mitochondrion                                      | 1.67848  | 0.022957 |
| BP | G0:00342 | positive regulation of cellular amide metabolic process                 | 1.630139 | 0.022961 |
| MF | G0:00168 | ligase activity                                                         | 1.661329 | 0.022975 |
| BP | G0:00995 | chemical synaptic transmission, postsynaptic                            | -1.63634 | 0.023052 |
| BP | G0:00316 | regulation of protein stability                                         | 1.496438 | 0.023052 |
| BP | G0:00064 | regulation of translational fidelity                                    | 1.873832 | 0.023166 |
| CC | G0:00057 | mitochondrial respiratory chain complex I                               | 1.80169  | 0.023392 |
| CC | G0:00309 | NADH dehydrogenase complex                                              | 1.80169  | 0.023392 |
| CC | G0:00452 | respiratory chain complex I                                             | 1.80169  | 0.023392 |
| BP | G0:00512 | regulation of lymphocyte activation                                     | 1.427776 | 0.023392 |
| BP | G0:00467 | heterocycle catabolic process                                           | 1.443384 | 0.02341  |
| CC | G0:00312 | anchored component of membrane                                          | -1.53636 | 0.02349  |
| BP | G0:00004 | maturation of LSU-rRNA                                                  | 1.864305 | 0.023593 |
| BP | G0:00022 | natural killer cell mediated immunity                                   | 1.743862 | 0.023636 |
| BP | G0:00095 | detection of biotic stimulus                                            | -1.96184 | 0.023861 |
| BP | G0:00508 | regulation of antigen receptor-mediated signaling                       | 1.762465 | 0.023872 |
| BP | G0:00326 | tumor necrosis factor production                                        | -1.52924 | 0.024427 |
| BP | G0:00326 | regulation of tumor necrosis factor production                          | -1.52924 | 0.024427 |
| CC | G0:00305 | small nuclear ribonucleoprotein complex                                 | 1.754131 | 0.024525 |
| BP | G0:00465 | regulation of viral entry into host cell                                | -1.90848 | 0.024786 |
| BP | G0:00324 | regulation of proteasomal ubiquitin-dependent protein catabolic process | 1.630845 | 0.026294 |
| BP | G0:00457 | negative regulation of cell cycle                                       | 1.477271 | 0.026912 |
| BP | G0:00712 | cellular response to mechanical stimulus                                | -1.68499 | 0.027028 |
| BP | G0:20003 | positive regulation of endothelial cell apoptotic process               | 1.893688 | 0.027028 |
| BP | G0:00989 | postsynaptic actin cytoskeleton organization                            | -1.95298 | 0.027028 |

|    |          |                                                                    |          |          |
|----|----------|--------------------------------------------------------------------|----------|----------|
| BP | G0:19001 | extracellular regulation of signal transduction                    | -1.95247 | 0.027028 |
| BP | G0:19001 | extracellular negative regulation of signal transduction           | -1.95247 | 0.027028 |
| BP | G0:00990 | plasma membrane invagination                                       | -1.7019  | 0.027028 |
| BP | G0:00324 | negative regulation of proteasomal ubiquitin-dependent proteolysis | 1.856577 | 0.027028 |
| BP | G0:00000 | ribosomal large subunit assembly                                   | 1.867489 | 0.027028 |
| BP | G0:19039 | negative regulation of viral life cycle                            | -1.915   | 0.027028 |
| MF | G0:00082 | protein methyltransferase activity                                 | 1.708546 | 0.027383 |
| CC | G0:00019 | uropod                                                             | -2.0182  | 0.027383 |
| CC | G0:00312 | cell trailing edge                                                 | -2.0182  | 0.027383 |
| MF | G0:01202 | acyl-CoA binding                                                   | 1.870055 | 0.028173 |
| BP | G0:19025 | regulation of neutrophil activation                                | -2.01469 | 0.028173 |
| BP | G0:00070 | lysosomal transport                                                | -1.60403 | 0.028653 |
| BP | G0:00432 | leukocyte degranulation                                            | -1.71579 | 0.029248 |
| BP | G0:00452 | external encapsulating structure organization                      | -1.42669 | 0.029248 |
| BP | G0:00423 | keratan sulfate metabolic process                                  | -1.9685  | 0.02954  |
| BP | G0:00430 | positive regulation of programmed cell death                       | -1.309   | 0.02954  |
| MF | G0:00037 | RNA helicase activity                                              | 1.697023 | 0.029615 |
| MF | G0:00036 | DNA helicase activity                                              | 1.714078 | 0.030148 |
| MF | G0:00501 | NADH dehydrogenase (quinone) activity                              | 1.87414  | 0.030256 |
| CC | G0:00315 | microvillus membrane                                               | -1.90032 | 0.030456 |
| BP | G0:00900 | regulation of peptide transport                                    | -1.48757 | 0.030519 |
| BP | G0:00725 | purine-containing compound metabolic process                       | 1.436936 | 0.030519 |
| BP | G0:00430 | extracellular structure organization                               | -1.43014 | 0.03061  |
| BP | G0:19033 | positive regulation of protein modification by small molecule      | 1.605786 | 0.030643 |
| BP | G0:00331 | mitochondrial respiratory chain complex assembly                   | 1.689648 | 0.030876 |
| BP | G0:19905 | mitochondrial transmembrane transport                              | 1.744277 | 0.030886 |
| BP | G0:00513 | kinetochore organization                                           | 1.828437 | 0.031197 |
| BP | G0:00327 | positive regulation of tumor necrosis factor production            | -1.6238  | 0.031336 |
| BP | G0:00064 | mRNA catabolic process                                             | 1.546311 | 0.031409 |
| MF | G0:00049 | olfactory receptor activity                                        | -1.3511  | 0.031414 |
| BP | G0:00321 | positive regulation of response to external stimulus               | -1.36744 | 0.031414 |
| BP | G0:00194 | aromatic compound catabolic process                                | 1.402098 | 0.031418 |
| BP | G0:00196 | aerobic electron transport chain                                   | 1.722794 | 0.031418 |
| BP | G0:00481 | regulation of synaptic plasticity                                  | -1.49251 | 0.031418 |
| MF | G0:00168 | isomerase activity                                                 | 1.615787 | 0.031418 |
| BP | G0:00063 | chromatin remodeling                                               | 1.585768 | 0.031418 |
| BP | G0:00902 | regulation of peptide hormone secretion                            | -1.45727 | 0.031418 |
| BP | G0:00064 | protein methylation                                                | 1.596417 | 0.031527 |
| BP | G0:00082 | protein alkylation                                                 | 1.596417 | 0.031527 |
| CC | G0:00007 | condensed chromosome                                               | 1.537047 | 0.031716 |
| BP | G0:00000 | G1/S transition of mitotic cell cycle                              | 1.55407  | 0.031716 |
| BP | G0:00506 | nucleic acid transport                                             | 1.574732 | 0.031716 |
| BP | G0:00506 | RNA transport                                                      | 1.574732 | 0.031716 |
| CC | G0:00421 | T cell receptor complex                                            | 1.879053 | 0.031716 |
| CC | G0:00007 | chromosome, centromeric region                                     | 1.538974 | 0.032637 |
| BP | G0:00091 | purine ribonucleotide biosynthetic process                         | 1.573066 | 0.032804 |
| BP | G0:00507 | regulation of phagocytosis                                         | -1.62    | 0.032804 |
| BP | G0:00341 | regulation of toll-like receptor signaling pathway                 | -1.66455 | 0.033121 |
| MF | G0:00551 | ubiquitin-protein transferase regulator activity                   | 1.803816 | 0.034087 |
| BP | G0:00083 | endosome to lysosome transport                                     | -1.82963 | 0.034087 |
| BP | G0:00300 | peptide hormone secretion                                          | -1.43917 | 0.034087 |
| MF | G0:00037 | transcription coregulator activity                                 | 1.398887 | 0.034098 |
| BP | G0:00600 | excitatory postsynaptic potential                                  | -1.55372 | 0.034202 |
| BP | G0:00327 | positive regulation of interleukin-1 production                    | -1.65787 | 0.034282 |



|    |                                                                           |                   |
|----|---------------------------------------------------------------------------|-------------------|
| BP | G0:00456:regulation of lymphocyte differentiation                         | 1.517291 0.034568 |
| MF | G0:00037:translation initiation factor activity                           | 1.790164 0.03487  |
| BP | G0:20012:positive regulation of chromosome organization                   | 1.680386 0.034931 |
| CC | G0:00080:synaptic vesicle                                                 | -1.41938 0.034931 |
| CC | G0:00017:immunological synapse                                            | 1.788947 0.034997 |
| BP | G0:00603:cell chemotaxis                                                  | -1.39766 0.035232 |
| BP | G0:00362:granulocyte activation                                           | -1.82713 0.035232 |
| BP | G0:00714:cellular response to external stimulus                           | -1.39979 0.035315 |
| BP | G0:00345:centromere complex assembly                                      | 1.826041 0.036273 |
| BP | G0:00361:cellular response to platelet-derived growth factor              | 1.785329 0.036273 |
| BP | G0:00985:detection of other organism                                      | -1.94676 0.036273 |
| MF | G0:00510:unfolded protein binding                                         | 1.620385 0.03635  |
| CC | G0:00092:nucleoid                                                         | 1.799681 0.03635  |
| CC | G0:00426:mitochondrial nucleoid                                           | 1.799681 0.03635  |
| CC | G0:00704:respirasome                                                      | 1.658227 0.03635  |
| BP | G0:00421:neutrophil activation                                            | -1.90941 0.03635  |
| BP | G0:00070:lysosome organization                                            | -1.70873 0.03635  |
| BP | G0:00801:lytic vacuole organization                                       | -1.70873 0.03635  |
| BP | G0:19031:mononuclear cell differentiation                                 | 1.416788 0.03635  |
| BP | G0:00433:regulation of leukocyte degranulation                            | -1.81972 0.03635  |
| MF | G0:00039:NADH dehydrogenase activity                                      | 1.799153 0.03635  |
| BP | G0:00452:mRNA cis splicing, via spliceosome                               | 1.808774 0.036481 |
| CC | G0:00057:mitochondrial respirasome                                        | 1.638039 0.036571 |
| BP | G0:00180:peptidyl-lysine methylation                                      | 1.651982 0.036625 |
| BP | G0:00349:histone lysine methylation                                       | 1.651982 0.036625 |
| BP | G0:00332:response to vitamin D                                            | -1.79931 0.036625 |
| BP | G0:00028:negative regulation of response to biotic stimulus               | -1.53923 0.036981 |
| BP | G0:00326:interleukin-1 beta production                                    | -1.55667 0.037343 |
| BP | G0:00326:regulation of interleukin-1 beta production                      | -1.55667 0.037343 |
| BP | G0:00336:cell-cell adhesion mediated by integrin                          | 1.855766 0.037343 |
| BP | G0:00061:oxidative phosphorylation                                        | 1.700726 0.037343 |
| BP | G0:00701:positive regulation of mitochondrial translation                 | 1.790969 0.037381 |
| BP | G0:00063:DNA-templated transcription, initiation                          | 1.646241 0.037381 |
| BP | G0:00705:protein localization to mitochondrion                            | 1.608576 0.037461 |
| BP | G0:19011:regulation of ERBB signaling pathway                             | -1.64801 0.03806  |
| BP | G0:00701:regulation of mitochondrial translation                          | 1.858693 0.038149 |
| BP | G0:00420:regulation of epidermal growth factor receptor signaling         | -1.64458 0.038149 |
| BP | G0:00510:positive regulation of DNA-binding transcription factor activity | -1.43377 0.038286 |
| BP | G0:00064:regulation of translational initiation                           | 1.65191 0.038794  |
| BP | G0:00024:immune response-activating cell surface receptor signaling       | 1.505796 0.038794 |
| BP | G0:00027:immune response-activating signal transduction                   | 1.505796 0.038794 |
| BP | G0:00512:establishment of RNA localization                                | 1.589566 0.038927 |
| BP | G0:19048:positive regulation of telomerase RNA localization               | 1.821215 0.038992 |
| BP | G0:00468:hormone secretion                                                | -1.37994 0.039143 |
| MF | G0:00170:U6 snRNA binding                                                 | 1.819722 0.03931  |
| CC | G0:00314:cullin-RING ubiquitin ligase complex                             | 1.575607 0.039554 |
| MF | G0:00166:oxidoreductase activity, acting on NAD(P)H, quinone              | 1.701269 0.039813 |
| BP | G0:00027:regulation of natural killer cell mediated immunity              | 1.736683 0.040407 |
| CC | G0:00710:catalytic step 2 spliceosome                                     | 1.695098 0.040407 |
| BP | G0:00305:leukocyte chemotaxis                                             | -1.39608 0.040924 |
| MF | G0:00081:ATP-dependent activity, acting on RNA                            | 1.680876 0.04101  |
| BP | G0:00480:vascular endothelial growth factor receptor signaling            | -1.72795 0.041416 |
| BP | G0:00726:establishment of protein localization to mitochondrion           | 1.562095 0.041776 |
| BP | G0:00508:multicellular organismal water homeostasis                       | -1.70375 0.041817 |

|    |                                                                |          |          |
|----|----------------------------------------------------------------|----------|----------|
| BP | G0:00723:signal transduction by p53 class mediator             | 1.574618 | 0.041852 |
| BP | G0:00065:GPI anchor metabolic process                          | 1.728899 | 0.041852 |
| BP | G0:00306:regulation of vitamin metabolic process               | 1.784448 | 0.041973 |
| BP | G0:20012:positive regulation of extrinsic apoptotic signal     | -1.77672 | 0.042161 |
| BP | G0:00340:stress granule assembly                               | 1.787221 | 0.042174 |
| BP | G0:00361:response to platelet-derived growth factor            | 1.803531 | 0.042303 |
| BP | G0:00442:cellular nitrogen compound catabolic process          | 1.397621 | 0.042395 |
| BP | G0:00161:snRNA processing                                      | 1.791346 | 0.042571 |
| BP | G0:00171:negative regulation of translation                    | 1.584208 | 0.042571 |
| CC | G0:00357:ribonucleoprotein granule                             | 1.455017 | 0.042571 |
| BP | G0:00159:energy derivation by oxidation of organic compound    | 1.461899 | 0.042957 |
| CC | G0:00056:nuclear envelope                                      | 1.404096 | 0.042974 |
| MF | G0:00336:sialic acid binding                                   | -1.84891 | 0.042974 |
| BP | G0:19012:regulation of NIK/NF-kappaB signaling                 | -1.60332 | 0.043079 |
| BP | G0:00229:electron transport chain                              | 1.54731  | 0.043086 |
| BP | G0:00061:purine nucleotide biosynthetic process                | 1.548693 | 0.043181 |
| BP | G0:00514:negative regulation of ubiquitin-protein transferase  | 1.797897 | 0.043181 |
| BP | G0:19046:regulation of ubiquitin protein ligase activity       | 1.784806 | 0.0435   |
| BP | G0:00196:ribose phosphate metabolic process                    | 1.402825 | 0.0435   |
| MF | G0:00039:NAD(P)H dehydrogenase (quinone) activity              | 1.781602 | 0.043935 |
| BP | G0:00507:regulation of peptidyl-tyrosine phosphorylation       | -1.40256 | 0.043948 |
| CC | G0:00056:U2 snRNP                                              | 1.794924 | 0.044544 |
| BP | G0:00301:sphingolipid catabolic process                        | -1.83704 | 0.044692 |
| BP | G0:00002:protein polyubiquitination                            | 1.475424 | 0.044776 |
| BP | G0:00523:modulation by symbiont of entry into host             | -1.77075 | 0.044776 |
| BP | G0:00600:regulation of postsynaptic membrane potential         | -1.47499 | 0.044776 |
| BP | G0:00901:establishment of protein localization to membrane     | 1.491984 | 0.044776 |
| CC | G0:00056:U2-type spliceosomal complex                          | 1.663068 | 0.044778 |
| BP | G0:00024:neutrophil mediated immunity                          | -1.85584 | 0.044778 |
| BP | G0:00300:myeloid cell differentiation                          | -1.34674 | 0.044778 |
| BP | G0:00018:NK T cell differentiation                             | 1.769919 | 0.044778 |
| MF | G0:00055:GTP binding                                           | 1.417068 | 0.044778 |
| MF | G0:00019:retinoic acid binding                                 | -1.8385  | 0.044823 |
| BP | G0:00165:histone methylation                                   | 1.591241 | 0.044823 |
| BP | G0:00430:positive regulation of apoptotic process              | -1.27811 | 0.04483  |
| MF | G0:00515:4 iron, 4 sulfur cluster binding                      | 1.765784 | 0.045061 |
| BP | G0:00450:regulated exocytosis                                  | -1.3939  | 0.045335 |
| BP | G0:20002:regulation of DNA biosynthetic process                | 1.610298 | 0.045335 |
| BP | G0:00322:positive regulation of actin filament bundle assembly | 1.681071 | 0.0454   |
| BP | G0:00463:ribose phosphate biosynthetic process                 | 1.527169 | 0.0454   |
| BP | G0:00027:MyD88-dependent toll-like receptor signaling pathway  | -1.82514 | 0.0454   |
| BP | G0:19050:autophagosome organization                            | -1.61928 | 0.0454   |
| BP | G0:00086:carbohydrate transport                                | -1.46495 | 0.0454   |
| BP | G0:00063:transcription by RNA polymerase I                     | 1.710575 | 0.04544  |
| BP | G0:00062:base-excision repair                                  | 1.734123 | 0.04544  |
| BP | G0:00514:regulation of stress fiber assembly                   | 1.611789 | 0.045789 |
| BP | G0:00092:ribonucleotide biosynthetic process                   | 1.511387 | 0.045789 |
| BP | G0:00338:nucleoside bisphosphate biosynthetic process          | 1.621971 | 0.045789 |
| BP | G0:00340:ribonucleoside bisphosphate biosynthetic process      | 1.621971 | 0.045789 |
| BP | G0:00340:purine nucleoside bisphosphate biosynthetic process   | 1.621971 | 0.045789 |
| MF | G0:00081:NADH dehydrogenase (ubiquinone) activity              | 1.819035 | 0.045885 |
| CC | G0:00703:exocytic vesicle                                      | -1.42258 | 0.046736 |
| BP | G0:00103:membrane invagination                                 | -1.6203  | 0.047239 |
| BP | G0:00352:ionotropic glutamate receptor signaling pathway       | -1.81789 | 0.047239 |

|    |          |                                                            |          |          |
|----|----------|------------------------------------------------------------|----------|----------|
| CC | G0:00310 | platelet alpha granule membrane                            | -1.86972 | 0.048014 |
| BP | G0:00550 | monovalent inorganic cation homeostasis                    | -1.45278 | 0.048222 |
| CC | G0:00988 | respiratory chain complex                                  | 1.634159 | 0.048222 |
| BP | G0:00700 | glycosylation                                              | 1.461755 | 0.048222 |
| BP | G0:00459 | positive regulation of transcription by RNA polymerase     | 1.783692 | 0.048222 |
| BP | G0:00083 | associative learning                                       | -1.58773 | 0.048222 |
| BP | G0:00463 | glucose import                                             | -1.61654 | 0.048222 |
| BP | G0:00450 | DNA-dependent DNA replication maintenance of fidelity      | 1.740145 | 0.048222 |
| BP | G0:19019 | regulation of cell cycle phase transition                  | 1.421751 | 0.048222 |
| MF | G0:00480 | receptor ligand activity                                   | -1.28555 | 0.048222 |
| BP | G0:20012 | positive regulation of apoptotic signaling pathway         | -1.47601 | 0.048222 |
| BP | G0:00311 | rRNA methylation                                           | 1.76291  | 0.048222 |
| BP | G0:00068 | superoxide metabolic process                               | -1.61373 | 0.04853  |
| BP | G0:00025 | cytokine production involved in inflammatory response      | -1.71409 | 0.04853  |
| BP | G0:19000 | regulation of cytokine production involved in inflammation | -1.71409 | 0.04853  |
| BP | G0:20001 | regulation of cysteine-type endopeptidase activity         | -1.40457 | 0.04853  |
| BP | G0:00338 | nucleoside bisphosphate metabolic process                  | 1.544124 | 0.04853  |
| BP | G0:00338 | ribonucleoside bisphosphate metabolic process              | 1.544124 | 0.04853  |
| BP | G0:00340 | purine nucleoside bisphosphate metabolic process           | 1.544124 | 0.04853  |
| CC | G0:01010 | chaperone complex                                          | 1.769228 | 0.048716 |
| MF | G0:00086 | rRNA methyltransferase activity                            | 1.757058 | 0.048716 |
| MF | G0:01401 | catalytic activity, acting on a rRNA                       | 1.757058 | 0.048716 |
| BP | G0:00182 | peptidyl-tyrosine modification                             | -1.31783 | 0.049643 |
| MF | G0:00037 | transcription coactivator activity                         | 1.434258 | 0.0498   |
| BP | G0:00436 | engulfment of apoptotic cell                               | -1.82787 | 0.0498   |
| BP | G0:00432 | regulation of cysteine-type endopeptidase activity         | -1.42618 | 0.049882 |
| BP | G0:00718 | protein transmembrane transport                            | 1.623751 | 0.04992  |

| ID       | Description                                            | NES      | p. adjust |
|----------|--------------------------------------------------------|----------|-----------|
| hsa03010 | Ribosome                                               | 2.682161 | 3.33E-08  |
| hsa04380 | Osteoclast differentiation                             | -2.15244 | 1.82E-05  |
| hsa03008 | Ribosome biogenesis in eukaryotes                      | 2.240244 | 1.82E-05  |
| hsa05152 | Tuberculosis                                           | -1.86382 | 9.29E-05  |
| hsa05168 | Herpes simplex virus 1 infection                       | 1.6624   | 0.000101  |
| hsa04142 | Lysosome                                               | -1.95555 | 0.000117  |
| hsa05167 | Kaposi sarcoma-associated herpesvirus infection        | -1.77751 | 0.00016   |
| hsa04145 | Phagosome                                              | -1.8918  | 0.000193  |
| hsa04613 | Neutrophil extracellular trap formation                | -1.96325 | 0.000343  |
| hsa03040 | Spliceosome                                            | 1.901131 | 0.00052   |
| hsa03013 | Nucleocytoplasmic transport                            | 1.831058 | 0.001607  |
| hsa03020 | RNA polymerase                                         | 2.018474 | 0.001857  |
| hsa05130 | Pathogenic Escherichia coli infection                  | -1.64415 | 0.001899  |
| hsa00970 | Aminoacyl-tRNA biosynthesis                            | 2.041089 | 0.002404  |
| hsa04910 | Insulin signaling pathway                              | -1.67233 | 0.003438  |
| hsa03030 | DNA replication                                        | 1.93906  | 0.003973  |
| hsa04110 | Cell cycle                                             | 1.741241 | 0.004662  |
| hsa04740 | Olfactory transduction                                 | -1.43179 | 0.004842  |
| hsa04620 | Toll-like receptor signaling pathway                   | -1.73715 | 0.005609  |
| hsa03420 | Nucleotide excision repair                             | 1.838431 | 0.00773   |
| hsa00620 | Pyruvate metabolism                                    | 1.789766 | 0.010893  |
| hsa04330 | Notch signaling pathway                                | -1.78003 | 0.015942  |
| hsa03060 | Protein export                                         | 1.886577 | 0.016843  |
| hsa03018 | RNA degradation                                        | 1.758213 | 0.016843  |
| hsa04666 | Fc gamma R-mediated phagocytosis                       | -1.67605 | 0.016843  |
| hsa05132 | Salmonella infection                                   | -1.43179 | 0.016843  |
| hsa04610 | Complement and coagulation cascades                    | -1.66578 | 0.016843  |
| hsa04062 | Chemokine signaling pathway                            | -1.50034 | 0.016843  |
| hsa04668 | TNF signaling pathway                                  | -1.61924 | 0.016843  |
| hsa01240 | Biosynthesis of cofactors                              | 1.564    | 0.017977  |
| hsa05340 | Primary immunodeficiency                               | 1.777018 | 0.018288  |
| hsa05417 | Lipid and atherosclerosis                              | -1.42236 | 0.018964  |
| hsa04080 | Neuroactive ligand-receptor interaction                | -1.36368 | 0.018964  |
| hsa04621 | NOD-like receptor signaling pathway                    | -1.52036 | 0.019571  |
| hsa00563 | Glycosylphosphatidylinositol (GPI)-anchor biosynthesis | 1.777603 | 0.019987  |
| hsa00280 | Valine, leucine and isoleucine degradation             | 1.682865 | 0.019987  |
| hsa04662 | B cell receptor signaling pathway                      | -1.63745 | 0.019987  |
| hsa04010 | MAPK signaling pathway                                 | -1.40411 | 0.019987  |
| hsa00100 | Steroid biosynthesis                                   | 1.824813 | 0.021039  |
| hsa04014 | Ras signaling pathway                                  | -1.42436 | 0.028971  |
| hsa05164 | Influenza A                                            | -1.4694  | 0.031595  |
| hsa04120 | Ubiquitin mediated proteolysis                         | 1.536454 | 0.031866  |
| hsa00600 | Sphingolipid metabolism                                | -1.76792 | 0.035587  |
| hsa04015 | Rap1 signaling pathway                                 | -1.38213 | 0.035587  |
| hsa05160 | Hepatitis C                                            | -1.42892 | 0.038497  |
| hsa05163 | Human cytomegalovirus infection                        | -1.37956 | 0.039612  |
| hsa04140 | Autophagy - animal                                     | -1.4133  | 0.043605  |
| hsa04930 | Type II diabetes mellitus                              | -1.6507  | 0.044905  |
| hsa00270 | Cysteine and methionine metabolism                     | 1.611843 | 0.045035  |
| hsa00510 | N-Glycan biosynthesis                                  | 1.639136 | 0.045035  |
| hsa04216 | Ferroptosis                                            | 1.638455 | 0.045099  |
| hsa04650 | Natural killer cell mediated cytotoxicity              | 1.49118  | 0.045459  |
| hsa03430 | Mismatch repair                                        | 1.701755 | 0.045459  |

|                                                   |          |          |
|---------------------------------------------------|----------|----------|
| hsa04625 C-type lectin receptor signaling pathway | -1.47963 | 0.046403 |
| hsa05134 Legionellosis                            | -1.60456 | 0.046774 |
| hsa05133 Pertussis                                | -1.55543 | 0.046966 |
| hsa05332 Graft-versus-host disease                | 1.590134 | 0.047688 |

**Supplementary Table 3: GSEA analysis of S100A12**

| ONTOLOGY ID | Description                                                     | NES      | p. adjust |
|-------------|-----------------------------------------------------------------|----------|-----------|
| MF          | G0:00037:structural constituent of ribosome                     | -2.52178 | 4.53E-08  |
| CC          | G0:00057:mitochondrial inner membrane                           | -2.39514 | 4.53E-08  |
| CC          | G0:00057:mitochondrial matrix                                   | -2.44293 | 4.53E-08  |
| CC          | G0:00058:ribosome                                               | -2.42282 | 4.53E-08  |
| BP          | G0:00063:rRNA processing                                        | -2.64504 | 4.53E-08  |
| BP          | G0:00064:translation                                            | -2.01344 | 4.53E-08  |
| BP          | G0:00160:rRNA metabolic process                                 | -2.56589 | 4.53E-08  |
| CC          | G0:00198:organelle inner membrane                               | -2.22842 | 4.53E-08  |
| BP          | G0:00226:ribonucleoprotein complex biogenesis                   | -2.3704  | 4.53E-08  |
| CC          | G0:00306:secretory granule membrane                             | 2.153923 | 4.53E-08  |
| CC          | G0:00306:preribosome                                            | -2.8536  | 4.53E-08  |
| BP          | G0:00344:ncRNA processing                                       | -2.54198 | 4.53E-08  |
| BP          | G0:00346:ncRNA metabolic process                                | -2.42494 | 4.53E-08  |
| BP          | G0:00422:ribosome biogenesis                                    | -2.54058 | 4.53E-08  |
| CC          | G0:00443:ribosomal subunit                                      | -2.56452 | 4.53E-08  |
| CC          | G0:00987:mitochondrial protein-containing complex               | -2.57347 | 4.53E-08  |
| MF          | G0:01406:catalytic activity, acting on a nucleic acid           | -1.91149 | 4.53E-08  |
| MF          | G0:00198:rRNA binding                                           | -2.64561 | 7.25E-08  |
| BP          | G0:00063:tRNA metabolic process                                 | -2.31403 | 2.14E-07  |
| CC          | G0:00708:tertiary granule                                       | 2.248922 | 2.68E-07  |
| MF          | G0:01400:catalytic activity, acting on RNA                      | -2.01199 | 2.83E-07  |
| CC          | G0:00003:organellar ribosome                                    | -2.46395 | 4.58E-07  |
| CC          | G0:00057:mitochondrial ribosome                                 | -2.46395 | 4.58E-07  |
| CC          | G0:00159:large ribosomal subunit                                | -2.27566 | 2.14E-06  |
| BP          | G0:00091:nucleoside monophosphate biosynthetic process          | -2.59401 | 2.25E-06  |
| BP          | G0:00080:tRNA processing                                        | -2.32236 | 2.35E-06  |
| BP          | G0:00000:autophagosome assembly                                 | 2.356707 | 4.48E-06  |
| CC          | G0:00159:small ribosomal subunit                                | -2.40266 | 9.69E-06  |
| BP          | G0:00325:mitochondrial translation                              | -2.38176 | 1.18E-05  |
| BP          | G0:00160:vesicle organization                                   | 1.889631 | 1.49E-05  |
| BP          | G0:00162:macroautophagy                                         | 1.894871 | 1.54E-05  |
| CC          | G0:00425:specific granule                                       | 2.102103 | 1.61E-05  |
| BP          | G0:19050:autophagosome organization                             | 2.267778 | 1.93E-05  |
| BP          | G0:20007:regulation of autophagosome assembly                   | 2.408393 | 3.48E-05  |
| BP          | G0:01400:mitochondrial gene expression                          | -2.28267 | 4.03E-05  |
| BP          | G0:00422:ribosomal large subunit biogenesis                     | -2.36069 | 4.62E-05  |
| BP          | G0:00091:ribonucleoside monophosphate biosynthetic process      | -2.47308 | 4.62E-05  |
| BP          | G0:00550:nucleobase-containing small molecule metabolic process | -1.66068 | 6.00E-05  |
| CC          | G0:00988:inner mitochondrial membrane protein complex           | -2.17688 | 6.30E-05  |
| CC          | G0:00320:small-subunit processome                               | -2.41497 | 9.77E-05  |
| CC          | G0:00057:primary lysosome                                       | 2.018059 | 0.000104  |
| CC          | G0:00425:azurophil granule                                      | 2.018059 | 0.000104  |
| BP          | G0:00102:endomembrane system organization                       | 1.734242 | 0.000143  |
| BP          | G0:00719:regulation of protein serine/threonine kinase activity | 1.740105 | 0.000222  |
| BP          | G0:00067:nucleoside phosphate metabolic process                 | -1.66589 | 0.000222  |
| CC          | G0:00003:organellar large ribosomal subunit                     | -2.26954 | 0.000222  |
| CC          | G0:00057:mitochondrial large ribosomal subunit                  | -2.26954 | 0.000222  |
| BP          | G0:00091:nucleoside monophosphate metabolic process             | -2.2254  | 0.000236  |
| BP          | G0:00310:positive regulation of histone deacetylation           | 2.28656  | 0.000236  |
| BP          | G0:00091:nucleotide metabolic process                           | -1.64809 | 0.000285  |
| BP          | G0:00091:purine nucleoside monophosphate biosynthetic process   | -2.3489  | 0.000301  |

|    |                                                             |          |          |
|----|-------------------------------------------------------------|----------|----------|
| BP | G0:00094:RNA modification                                   | -1.98627 | 0.000384 |
| BP | G0:00903:nucleic acid phosphodiester bond hydrolysis        | -1.84517 | 0.000418 |
| CC | G0:00306:90S preribosome                                    | -2.3214  | 0.00048  |
| BP | G0:00064:tRNA modification                                  | -2.17735 | 0.000556 |
| BP | G0:00725:purine-containing compound metabolic process       | -1.66801 | 0.000556 |
| BP | G0:00226:ribonucleoprotein complex assembly                 | -1.91532 | 0.000556 |
| MF | G0:01401:catalytic activity, acting on a tRNA               | -2.08021 | 0.000556 |
| BP | G0:00069:autophagy                                          | 1.630111 | 0.000607 |
| BP | G0:00619:process utilizing autophagic mechanism             | 1.630111 | 0.000607 |
| BP | G0:00061:purine nucleotide metabolic process                | -1.65419 | 0.000622 |
| BP | G0:00304:maturation of SSU-rRNA                             | -2.28474 | 0.000837 |
| MF | G0:00192:nucleobase-containing compound kinase activity     | -2.28826 | 0.00086  |
| CC | G0:00100:endosome membrane                                  | 1.592851 | 0.000997 |
| CC | G0:00306:preribosome, large subunit precursor               | -2.29183 | 0.001258 |
| CC | G0:00226:cytosolic ribosome                                 | -1.97748 | 0.001331 |
| MF | G0:00430:ribonucleoprotein complex binding                  | -1.9044  | 0.001367 |
| BP | G0:19021:regulation of organelle assembly                   | 1.843232 | 0.001546 |
| BP | G0:00062:pyrimidine nucleotide biosynthetic process         | -2.24218 | 0.00156  |
| BP | G0:00091:purine nucleobase biosynthetic process             | -2.228   | 0.001726 |
| BP | G0:00004:maturation of SSU-rRNA from tricistronic rRNA tra  | -2.30745 | 0.001736 |
| BP | G0:00461:pigment biosynthetic process                       | -2.09447 | 0.001736 |
| BP | G0:00060:generation of precursor metabolites and energy     | -1.57521 | 0.001736 |
| BP | G0:00066:NLS-bearing protein import into nucleus            | 2.165203 | 0.001817 |
| BP | G0:00422:ribosomal small subunit biogenesis                 | -2.08539 | 0.001841 |
| BP | G0:00718:ribonucleoprotein complex subunit organization     | -1.84226 | 0.001841 |
| BP | G0:00071:transmembrane receptor protein serine/threonine k  | 1.660941 | 0.001845 |
| BP | G0:00331:mitochondrial respiratory chain complex assembly   | -2.10043 | 0.001908 |
| MF | G0:00000:tRNA binding                                       | -2.2352  | 0.001974 |
| BP | G0:00622:positive regulation of pattern recognition recept  | 2.155095 | 0.001997 |
| BP | G0:00062:pyrimidine nucleotide metabolic process            | -2.13564 | 0.002122 |
| BP | G0:00440:regulation of vacuole organization                 | 2.143875 | 0.00236  |
| MF | G0:00053:ATP transmembrane transporter activity             | -2.19329 | 0.002637 |
| BP | G0:00023:immunoglobulin production                          | -1.8527  | 0.002915 |
| BP | G0:00022:myeloid leukocyte activation                       | 1.679626 | 0.002915 |
| MF | G0:00197:ubiquitin-like protein transferase activity        | 1.5909   | 0.002915 |
| CC | G0:00092:nucleoid                                           | -2.1111  | 0.002934 |
| CC | G0:00426:mitochondrial nucleoid                             | -2.1111  | 0.002934 |
| BP | G0:00070:actin filament organization                        | 1.600024 | 0.002977 |
| BP | G0:00900:regulation of transmembrane receptor protein seri  | 1.689892 | 0.003122 |
| BP | G0:00028:positive regulation of response to biotic stimulus | 1.799353 | 0.00313  |
| BP | G0:00064:regulation of translation                          | -1.61271 | 0.00317  |
| CC | G0:00355:specific granule membrane                          | 1.960657 | 0.003427 |
| BP | G0:00091:ribonucleoside monophosphate metabolic process     | -2.03726 | 0.003427 |
| MF | G0:00192:kinase activator activity                          | 1.884049 | 0.003554 |
| BP | G0:00433:positive T cell selection                          | -2.15263 | 0.0036   |
| CC | G0:00355:azurophil granule membrane                         | 2.084076 | 0.0036   |
| MF | G0:00039:G protein activity                                 | 2.10664  | 0.003602 |
| BP | G0:00461:nucleobase biosynthetic process                    | -2.20807 | 0.003989 |
| BP | G0:00427:defense response to bacterium                      | 1.704697 | 0.003989 |
| BP | G0:00090:aerobic respiration                                | -1.77422 | 0.003989 |
| BP | G0:00021:cytoplasmic translation                            | -1.85391 | 0.004103 |
| BP | G0:00341:positive regulation of toll-like receptor signal   | 2.072177 | 0.004112 |
| BP | G0:00985:detection of external biotic stimulus              | 2.108185 | 0.004289 |
| CC | G0:00453:phagocytic vesicle                                 | 1.775562 | 0.004289 |

|    |          |                                                    |          |          |
|----|----------|----------------------------------------------------|----------|----------|
| BP | G0:00091 | purine nucleoside monophosphate metabolic process  | -2.09718 | 0.004289 |
| MF | G0:00501 | NAD(P)+ nucleosidase activity                      | 2.100337 | 0.004289 |
| MF | G0:00618 | NAD+ nucleotidase, cyclic ADP-ribose generating    | 2.100337 | 0.004289 |
| CC | G0:00057 | early endosome                                     | 1.60174  | 0.004289 |
| CC | G0:00003 | organellar small ribosomal subunit                 | -2.18547 | 0.004289 |
| CC | G0:00057 | mitochondrial small ribosomal subunit              | -2.18547 | 0.004289 |
| MF | G0:00167 | phosphotransferase activity, for other substituted | -2.15057 | 0.004289 |
| BP | G0:01200 | regulation of plasma membrane bounded cell projec  | 1.777668 | 0.004289 |
| BP | G0:00422 | ribosome assembly                                  | -2.11342 | 0.004289 |
| MF | G0:00435 | protein serine/threonine kinase activator activity | 2.03278  | 0.004315 |
| MF | G0:00045 | nuclease activity                                  | -1.70438 | 0.004343 |
| CC | G0:01010 | ficolin-1-rich granule                             | 1.749157 | 0.004358 |
| BP | G0:00196 | ribose phosphate metabolic process                 | -1.56022 | 0.004514 |
| BP | G0:00095 | detection of biotic stimulus                       | 2.109352 | 0.004514 |
| BP | G0:00072 | small GTPase mediated signal transduction          | 1.519223 | 0.004565 |
| CC | G0:00226 | cytosolic small ribosomal subunit                  | -2.09145 | 0.004605 |
| BP | G0:00604 | regulation of cell projection assembly             | 1.772796 | 0.004651 |
| BP | G0:00106 | posttranscriptional regulation of gene expression  | -1.54665 | 0.004891 |
| MF | G0:00515 | iron-sulfur cluster binding                        | -1.97432 | 0.004891 |
| MF | G0:00515 | metal cluster binding                              | -1.97432 | 0.004891 |
| MF | G0:00166 | oxidoreductase activity, acting on the CH-OH group | -1.79995 | 0.004891 |
| MF | G0:00039 | GTPase activity                                    | 1.610058 | 0.00495  |
| BP | G0:00091 | purine ribonucleoside monophosphate biosynthetic p | -2.17819 | 0.005039 |
| BP | G0:00719 | positive regulation of protein serine/threonine k  | 1.685881 | 0.0051   |
| CC | G0:00347 | secretory granule lumen                            | 1.611183 | 0.005289 |
| BP | G0:00004 | cleavage involved in rRNA processing               | -2.1771  | 0.005289 |
| BP | G0:00092 | ribonucleotide metabolic process                   | -1.56134 | 0.00557  |
| BP | G0:00712 | cellular response to biotic stimulus               | 1.641524 | 0.005691 |
| MF | G0:00616 | ubiquitin-like protein ligase activity             | 1.595531 | 0.00577  |
| BP | G0:00421 | neutrophil activation                              | 2.061446 | 0.00587  |
| BP | G0:00070 | vacuole organization                               | 1.758238 | 0.005911 |
| BP | G0:00060 | tricarboxylic acid cycle                           | -2.12791 | 0.005965 |
| BP | G0:00313 | positive regulation of cellular catabolic process  | 1.526088 | 0.005965 |
| BP | G0:19012 | nucleoside phosphate biosynthetic process          | -1.6686  | 0.005965 |
| BP | G0:00324 | Rap protein signal transduction                    | 2.058076 | 0.005965 |
| BP | G0:00516 | organelle localization                             | 1.518887 | 0.006017 |
| BP | G0:00725 | purine-containing compound biosynthetic process    | -1.66231 | 0.00606  |
| MF | G0:00050 | GTPase activator activity                          | 1.543719 | 0.006179 |
| BP | G0:00453 | cellular respiration                               | -1.69111 | 0.006193 |
| CC | G0:01010 | ficolin-1-rich granule membrane                    | 1.974422 | 0.006298 |
| BP | G0:00182 | peptidyl-threonine modification                    | 1.774579 | 0.006298 |
| BP | G0:00064 | RNA localization                                   | -1.63922 | 0.006548 |
| BP | G0:00091 | nucleotide biosynthetic process                    | -1.64352 | 0.006585 |
| BP | G0:00709 | neutrophil mediated cytotoxicity                   | 2.055145 | 0.006588 |
| MF | G0:00166 | oxidoreductase activity, acting on CH-OH group of  | -1.73136 | 0.006609 |
| BP | G0:00091 | nucleoside triphosphate biosynthetic process       | -2.03789 | 0.006609 |
| BP | G0:00091 | purine ribonucleotide metabolic process            | -1.53919 | 0.006628 |
| BP | G0:00023 | immunoglobulin production involved in immunoglobu  | -1.9459  | 0.006628 |
| CC | G0:00319 | vesicle lumen                                      | 1.574061 | 0.006785 |
| BP | G0:00067 | heme biosynthetic process                          | -2.07748 | 0.007121 |
| BP | G0:00024 | neutrophil mediated immunity                       | 2.03266  | 0.007155 |
| BP | G0:00513 | positive regulation of transferase activity        | 1.494292 | 0.007155 |
| BP | G0:00726 | establishment of protein localization to mitochon  | -1.79504 | 0.007363 |
| BP | G0:19047 | vascular associated smooth muscle cell migration   | 2.003001 | 0.007506 |



|    |                                                             |                   |
|----|-------------------------------------------------------------|-------------------|
| CC | G0:00708:tertiary granule membrane                          | 1.90401 0.007506  |
| BP | G0:00065:glutamine metabolic process                        | -2.08093 0.008088 |
| MF | G0:00900:translation regulator activity, nucleic acid bindi | -1.83317 0.008154 |
| BP | G0:00362:granulocyte activation                             | 2.001588 0.00817  |
| BP | G0:00705:protein localization to mitochondrion              | -1.75611 0.008259 |
| BP | G0:00460:ATP metabolic process                              | -1.62188 0.008309 |
| BP | G0:00450:positive regulation of innate immune response      | 1.768114 0.008362 |
| BP | G0:00003:spliceosomal snRNP assembly                        | -2.0879 0.00857   |
| BP | G0:00487:tissue remodeling                                  | 1.650586 0.008747 |
| CC | G0:00602:cytoplasmic vesicle lumen                          | 1.583261 0.008876 |
| BP | G0:00002:protein polyubiquitination                         | 1.602344 0.009296 |
| BP | G0:00091:pyrimidine nucleoside triphosphate metabolic proce | -2.06763 0.009307 |
| BP | G0:00102:NADH dehydrogenase complex assembly                | -2.00468 0.009416 |
| BP | G0:00329:mitochondrial respiratory chain complex I assembly | -2.00468 0.009416 |
| BP | G0:00105:regulation of autophagy                            | 1.561499 0.009537 |
| MF | G0:00198:protein kinase regulator activity                  | 1.641198 0.009825 |
| BP | G0:00068:mitochondrial transport                            | -1.5884 0.010072  |
| MF | G0:00048:ubiquitin-protein transferase activity             | 1.534405 0.01033  |
| CC | G0:00990:vesicle tethering complex                          | -1.96053 0.010408 |
| BP | G0:00715:response to transforming growth factor beta        | 1.585503 0.010408 |
| MF | G0:01402:DNA-binding transcription factor binding           | 1.528228 0.010413 |
| CC | G0:00704:respirasome                                        | -1.84521 0.010413 |
| BP | G0:00709:neutrophil-mediated killing of symbiont cell       | 2.024604 0.010413 |
| MF | G0:00037:transcription coregulator activity                 | 1.520827 0.010463 |
| BP | G0:00723:tricarboxylic acid metabolic process               | -2.08606 0.010525 |
| BP | G0:00450:glycerolipid biosynthetic process                  | 1.63955 0.010546  |
| BP | G0:00450:regulation of innate immune response               | 1.59527 0.010662  |
| BP | G0:00022:neutrophil activation involved in immune response  | 2.003637 0.010816 |
| BP | G0:00342:regulation of cellular amide metabolic process     | -1.49026 0.010998 |
| CC | G0:00057:mitochondrial respirasome                          | -1.83617 0.010998 |
| CC | G0:00156:actin cytoskeleton                                 | 1.451043 0.010998 |
| MF | G0:00167:phosphotransferase activity, phosphate group as ac | -2.07437 0.010998 |
| MF | G0:00302:protein kinase activator activity                  | 1.808569 0.010998 |
| BP | G0:00344:ncRNA 5'-end processing                            | -2.09381 0.0112   |
| BP | G0:00163:dephosphorylation                                  | 1.539338 0.011625 |
| BP | G0:00070:mitochondrion organization                         | -1.46798 0.011625 |
| BP | G0:00022:activation of innate immune response               | 1.894148 0.011625 |
| BP | G0:00725:pyrimidine-containing compound biosynthetic proces | -2.04147 0.011625 |
| BP | G0:00162:regulation of macroautophagy                       | 1.691598 0.011625 |
| BP | G0:00065:protein monoubiquitination                         | 1.904594 0.011774 |
| BP | G0:00985:detection of other organism                        | 1.972313 0.011822 |
| BP | G0:00709:neutrophil-mediated killing of bacterium           | 1.957925 0.011856 |
| CC | G0:19047:tertiary granule lumen                             | 1.891647 0.011921 |
| BP | G0:00086:phospholipid biosynthetic process                  | 1.569853 0.011964 |
| BP | G0:00424:pigment metabolic process                          | -1.81743 0.011981 |
| BP | G0:00465:protoporphyrinogen IX metabolic process            | -2.09534 0.012334 |
| CC | G0:00424:nuclear inclusion body                             | 1.983736 0.012337 |
| CC | G0:19025:endoribonuclease complex                           | -2.01202 0.012338 |
| BP | G0:00610:membrane fusion                                    | 1.705769 0.012596 |
| MF | G0:01400:catalytic activity, acting on DNA                  | -1.57251 0.012655 |
| MF | G0:00469:thyroid hormone receptor binding                   | 1.9911 0.012733   |
| MF | G0:00043:helicase activity                                  | -1.67398 0.012773 |
| CC | G0:00057:late endosome                                      | 1.561439 0.012829 |
| BP | G0:19016:glycosyl compound metabolic process                | -1.77791 0.012839 |

|    |                                                                                |          |          |
|----|--------------------------------------------------------------------------------|----------|----------|
| CC | G0:003130intrinsic component of mitochondrial inner membrane                   | -1.95259 | 0.012939 |
| CC | G0:003130integral component of mitochondrial inner membrane                    | -1.95259 | 0.012939 |
| CC | G0:003067ribonuclease P complex                                                | -2.0794  | 0.013198 |
| BP | G0:000920ribonucleoside triphosphate biosynthetic process                      | -1.96009 | 0.013198 |
| BP | G0:000916nucleoside diphosphate metabolic process                              | -1.71173 | 0.013369 |
| BP | G0:000916pyrimidine nucleoside monophosphate biosynthetic process              | -2.0772  | 0.013697 |
| CC | G0:001977proteasome core complex, beta-subunit complex                         | -2.04508 | 0.013697 |
| BP | G0:003367positive regulation of kinase activity                                | 1.438061 | 0.013697 |
| BP | G0:199054mitochondrial transmembrane transport                                 | -1.81417 | 0.013942 |
| BP | G0:006147regulation of transcription from RNA polymerase II promoter           | 1.966865 | 0.013942 |
| CC | G0:001660nuclear speck                                                         | 1.527316 | 0.014075 |
| BP | G0:000090tRNA 5'-end processing                                                | -2.06117 | 0.014326 |
| MF | G0:000818ATP-dependent activity, acting on RNA                                 | -1.80166 | 0.014454 |
| BP | G0:000628DNA repair                                                            | -1.44399 | 0.01452  |
| BP | G0:009017organelle membrane fusion                                             | 1.776891 | 0.01452  |
| BP | G0:007017regulation of mitochondrial translation                               | -2.02504 | 0.014691 |
| BP | G0:011007regulation of actin filament organization                             | 1.561084 | 0.01472  |
| BP | G0:004367regulation of DNA-templated transcription in response to stress       | 1.882845 | 0.01472  |
| BP | G0:009911tRNA 5'-end processing                                                | -2.06519 | 0.014826 |
| BP | G0:005180protein autoubiquitination                                            | 1.82381  | 0.015029 |
| BP | G0:000610nucleoside diphosphate phosphorylation                                | -1.73926 | 0.015101 |
| BP | G0:004340regulation of MAP kinase activity                                     | 1.623275 | 0.01516  |
| BP | G0:000610purine nucleotide biosynthetic process                                | -1.66001 | 0.015378 |
| MF | G0:003069GTPase regulator activity                                             | 1.46986  | 0.015378 |
| MF | G0:006058nucleoside-triphosphatase regulator activity                          | 1.46986  | 0.015378 |
| CC | G0:000579endoplasmic reticulum-Golgi intermediate compartment                  | 1.707877 | 0.015523 |
| BP | G0:000655cellular amino acid metabolic process                                 | -1.53878 | 0.015523 |
| BP | G0:001810peptidyl-threonine phosphorylation                                    | 1.747765 | 0.015813 |
| BP | G0:000916purine ribonucleoside monophosphate metabolic process                 | -2.00385 | 0.015813 |
| BP | G0:006067regulation of vesicle-mediated transport                              | 1.449626 | 0.016083 |
| BP | G0:004648glycerolipid metabolic process                                        | 1.513209 | 0.016114 |
| BP | G0:000916pyrimidine nucleoside triphosphate biosynthetic process               | -2.04058 | 0.016114 |
| BP | G0:000222toll-like receptor signaling pathway                                  | 1.696926 | 0.016114 |
| BP | G0:004300regulation of GTPase activity                                         | 1.521431 | 0.01617  |
| CC | G0:009880respiratory chain complex                                             | -1.80641 | 0.016328 |
| BP | G0:003649regulation of translation in response to endoplasmic reticulum stress | 1.925923 | 0.016406 |
| CC | G0:003049midbody                                                               | 1.611593 | 0.016406 |
| BP | G0:001619endosomal transport                                                   | 1.60379  | 0.016527 |
| BP | G0:001480muscle cell migration                                                 | 1.777373 | 0.016527 |
| BP | G0:007150cellular response to transforming growth factor beta                  | 1.575485 | 0.016527 |
| BP | G0:003130positive regulation of cell projection organization                   | 1.503754 | 0.016548 |
| CC | G0:003280plasma membrane bounded cell projection cytoplasmic domain            | 1.606312 | 0.016548 |
| MF | G0:001900GDP binding                                                           | 1.792934 | 0.016548 |
| CC | G0:003067phagocytic vesicle membrane                                           | 1.780251 | 0.016882 |
| BP | G0:000720Ras protein signal transduction                                       | 1.533804 | 0.016895 |
| CC | G0:006170inflammasome complex                                                  | 1.970816 | 0.016993 |
| MF | G0:004633SMAD binding                                                          | 1.789286 | 0.017259 |
| BP | G0:005169establishment of organelle localization                               | 1.501602 | 0.017331 |
| BP | G0:000239MHC class II protein complex assembly                                 | -1.9967  | 0.017576 |
| BP | G0:000250peptide antigen assembly with MHC class II protein                    | -1.9967  | 0.017576 |
| BP | G0:000000ribosomal large subunit assembly                                      | -2.03375 | 0.017863 |
| BP | G0:000690vesicle fusion                                                        | 1.714128 | 0.017863 |
| MF | G0:000377RNA helicase activity                                                 | -1.82269 | 0.018228 |
| MF | G0:0051544 iron, 4 sulfur cluster binding                                      | -1.97213 | 0.018228 |

|    |                                                                    |                   |
|----|--------------------------------------------------------------------|-------------------|
| BP | G0:00070:endosome organization                                     | 1.789081 0.018313 |
| BP | G0:00303:positive regulation of cell migration                     | 1.434 0.018339    |
| BP | G0:00062:DNA strand elongation involved in DNA replication         | -2.02381 0.018451 |
| MF | G0:00087:S-adenosylmethionine-dependent methyltransferase activity | -1.6894 0.018754  |
| BP | G0:00463:ribose phosphate biosynthetic process                     | -1.61819 0.018754 |
| BP | G0:00004:endonucleolytic cleavage involved in rRNA processing      | -2.01005 0.018754 |
| BP | G0:00004:endonucleolytic cleavage of tricistronic rRNA transcripts | -2.01005 0.018754 |
| MF | G0:00616:ubiquitin protein ligase activity                         | 1.548289 0.018907 |
| BP | G0:00108:regulation of sequestering of triglyceride                | 1.904454 0.018963 |
| BP | G0:00105:regulation of lamellipodium assembly                      | 1.935325 0.019009 |
| BP | G0:00431:receptor metabolic process                                | 1.595897 0.019028 |
| BP | G0:00149:smooth muscle cell migration                              | 1.774956 0.019028 |
| BP | G0:00092:cellular response to starvation                           | 1.662125 0.019028 |
| BP | G0:00300:establishment of cell polarity                            | 1.663246 0.019028 |
| BP | G0:00092:pyrimidine ribonucleoside triphosphate biosynthesis       | -2.03845 0.019037 |
| MF | G0:00081:translation factor activity, RNA binding                  | -1.79811 0.019198 |
| BP | G0:00023:MHC protein complex assembly                              | -1.94239 0.019198 |
| BP | G0:00092:pyrimidine ribonucleotide biosynthetic process            | -2.02025 0.019198 |
| MF | G0:00342:peptide N-acetyltransferase activity                      | 1.929031 0.019198 |
| MF | G0:00617:peptide-lysine-N-acetyltransferase activity               | 1.929031 0.019198 |
| MF | G0:00154:oxidoreduction-driven active transmembrane transport      | -1.8067 0.019204  |
| CC | G0:00442:organelle membrane contact site                           | 1.904388 0.019489 |
| BP | G0:00196:aerobic electron transport chain                          | -1.80158 0.019757 |
| BP | G0:00022:adaptive immune response                                  | -1.41493 0.01978  |
| MF | G0:00510:chaperone binding                                         | -1.70964 0.01978  |
| MF | G0:00168:ligase activity                                           | -1.69061 0.020272 |
| MF | G0:00230:MHC class II protein complex binding                      | -1.97749 0.020282 |
| BP | G0:00905:RNA phosphodiester bond hydrolysis, endonucleolytic       | -1.81869 0.020338 |
| BP | G0:00464:glycerophospholipid biosynthetic process                  | 1.583616 0.020364 |
| BP | G0:00072:spermatogenesis                                           | 1.441714 0.020516 |
| CC | G0:00325:integral component of mitochondrial membrane              | -1.75306 0.020912 |
| BP | G0:00714:cellular response to external stimulus                    | 1.497841 0.020912 |
| BP | G0:00025:peptide antigen assembly with MHC protein complex         | -2.00731 0.020958 |
| MF | G0:01403:solute:anion antiporter activity                          | -1.97379 0.020987 |
| BP | G0:01200:plasma membrane bounded cell projection assembly          | 1.467546 0.021015 |
| BP | G0:00713:cellular response to peptide hormone stimulus             | 1.472443 0.021656 |
| BP | G0:00469:nucleotide phosphorylation                                | -1.73198 0.022067 |
| BP | G0:00458:positive regulation of protein kinase activity            | 1.444451 0.022187 |
| BP | G0:19047:regulation of vascular associated smooth muscle cell      | 1.9252 0.022512   |
| BP | G0:00459:negative regulation of phosphate metabolic processes      | 1.432158 0.022512 |
| MF | G0:00167:phosphatase activity                                      | 1.506894 0.022512 |
| MF | G0:00090:electron transfer activity                                | -1.65903 0.023395 |
| MF | G0:00350:phosphatidylinositol binding                              | 1.53516 0.023396  |
| CC | G0:00057:autophagosome                                             | 1.74587 0.023752  |
| BP | G0:00900:regulation of anatomical structure size                   | 1.41139 0.023806  |
| BP | G0:00064:translational elongation                                  | -1.84197 0.02386  |
| MF | G0:00323:MHC class II receptor activity                            | -1.97819 0.02386  |
| MF | G0:00168:carbon-oxygen lyase activity                              | -1.79917 0.023909 |
| BP | G0:00081:actin polymerization or depolymerization                  | 1.542303 0.024031 |
| CC | G0:00001:ubiquitin ligase complex                                  | 1.490619 0.024058 |
| MF | G0:00353:Toll-like receptor binding                                | 1.889401 0.024058 |
| MF | G0:00451:translation regulator activity                            | -1.67673 0.024058 |
| BP | G0:00445:NLRP3 inflammasome complex assembly                       | 1.867759 0.024058 |
| BP | G0:01406:inflammasome complex assembly                             | 1.867759 0.024058 |

|    |          |                                                        |          |          |
|----|----------|--------------------------------------------------------|----------|----------|
| BP | G0:00440 | positive regulation of cellular component biogenesis   | 1.404845 | 0.024058 |
| MF | G0:00230 | MHC protein complex binding                            | -1.92105 | 0.024068 |
| BP | G0:00027 | MyD88-dependent toll-like receptor signaling pathway   | 1.894796 | 0.024068 |
| BP | G0:00092 | ribonucleotide biosynthetic process                    | -1.62893 | 0.024157 |
| MF | G0:00037 | actin binding                                          | 1.430672 | 0.024248 |
| BP | G0:00430 | positive regulation of macrophage activation           | 1.893517 | 0.024248 |
| BP | G0:00164 | cytosolic transport                                    | 1.591205 | 0.024792 |
| CC | G0:00057 | secondary lysosome                                     | 1.889675 | 0.025226 |
| BP | G0:00427 | ATP synthesis coupled electron transport               | -1.74342 | 0.025316 |
| BP | G0:00427 | mitochondrial ATP synthesis coupled electron transport | -1.74342 | 0.025316 |
| BP | G0:00482 | male gamete generation                                 | 1.419219 | 0.025785 |
| BP | G0:00508 | modulation of chemical synaptic transmission           | 1.458813 | 0.026276 |
| BP | G0:00991 | regulation of trans-synaptic signaling                 | 1.458813 | 0.026276 |
| BP | G0:00329 | regulation of actin cytoskeleton organization          | 1.457238 | 0.026564 |
| MF | G0:00055 | phospholipid binding                                   | 1.443824 | 0.026693 |
| BP | G0:19016 | cellular response to peptide                           | 1.460577 | 0.026693 |
| BP | G0:19029 | negative regulation of autophagosome assembly          | 1.850549 | 0.027022 |
| BP | G0:00324 | detection of molecule of bacterial origin              | 1.918932 | 0.027032 |
| BP | G0:00450 | T cell selection                                       | -1.8681  | 0.027032 |
| BP | G0:00905 | RNA phosphodiester bond hydrolysis                     | -1.6475  | 0.027032 |
| BP | G0:00450 | positive thymic T cell selection                       | -1.95764 | 0.027032 |
| BP | G0:00001 | rRNA modification                                      | -1.97382 | 0.027051 |
| CC | G0:00355 | specific granule lumen                                 | 1.754017 | 0.027142 |
| MF | G0:00046 | protein serine/threonine kinase activity               | 1.423826 | 0.027142 |
| BP | G0:00709 | protein K48-linked ubiquitination                      | 1.721073 | 0.02739  |
| BP | G0:00022 | pattern recognition receptor signaling pathway         | 1.590102 | 0.02739  |
| BP | G0:19016 | alpha-amino acid biosynthetic process                  | -1.73955 | 0.027848 |
| BP | G0:00158 | ATP transport                                          | -1.95582 | 0.027848 |
| MF | G0:00510 | unfolded protein binding                               | -1.61333 | 0.027863 |
| BP | G0:00356 | protein deacylation                                    | 1.643957 | 0.028175 |
| BP | G0:00975 | lamellipodium organization                             | 1.747639 | 0.02849  |
| BP | G0:00903 | positive regulation of protein deacetylation           | 1.879815 | 0.028722 |
| BP | G0:00300 | cell projection assembly                               | 1.420208 | 0.028841 |
| MF | G0:00428 | histone deacetylase binding                            | 1.649902 | 0.028908 |
| BP | G0:00621 | cellular response to chemical stress                   | 1.490737 | 0.028982 |
| BP | G0:00165 | histone modification                                   | 1.437808 | 0.029044 |
| BP | G0:00182 | peptidyl-serine modification                           | 1.440889 | 0.029226 |
| BP | G0:00009 | mitochondrial RNA metabolic process                    | -1.87777 | 0.029815 |
| BP | G0:00513 | cell division                                          | 1.361838 | 0.029815 |
| MF | G0:00192 | kinase regulator activity                              | 1.521814 | 0.030167 |
| BP | G0:00346 | nucleobase-containing compound catabolic process       | -1.3917  | 0.030337 |
| CC | G0:00057 | mitochondrial outer membrane translocase complex       | -1.92608 | 0.031067 |
| BP | G0:01061 | cold-induced thermogenesis                             | 1.628583 | 0.031067 |
| BP | G0:01201 | regulation of cold-induced thermogenesis               | 1.628583 | 0.031067 |
| BP | G0:00071 | transforming growth factor beta receptor signaling     | 1.554562 | 0.031071 |
| BP | G0:00064 | protein dephosphorylation                              | 1.499797 | 0.031071 |
| BP | G0:00400 | positive regulation of locomotion                      | 1.375269 | 0.03143  |
| BP | G0:00149 | regulation of smooth muscle cell migration             | 1.696475 | 0.031553 |
| CC | G0:00319 | organelle envelope lumen                               | -1.70494 | 0.03199  |
| BP | G0:00194 | aromatic compound catabolic process                    | -1.38215 | 0.03199  |
| MF | G0:00045 | exonuclease activity                                   | -1.77267 | 0.032571 |
| BP | G0:00442 | small molecule catabolic process                       | -1.39703 | 0.032607 |
| BP | G0:00162 | iron-sulfur cluster assembly                           | -1.95963 | 0.033155 |
| BP | G0:00311 | metallo-sulfur cluster assembly                        | -1.95963 | 0.033155 |

|    |          |                                                    |          |          |
|----|----------|----------------------------------------------------|----------|----------|
| BP | G0:00004 | maturacion of 5.8S rRNA from tricistronic rRNA tra | -1.94019 | 0.033386 |
| BP | G0:00364 | PERK-mediated unfolded protein response            | 1.852876 | 0.0343   |
| CC | G0:00057 | mitochondrial intermembrane space                  | -1.68728 | 0.034432 |
| BP | G0:00105 | negative regulation of phosphorus metabolic proces | 1.426336 | 0.034432 |
| BP | G0:00093 | 2'-deoxyribonucleotide metabolic process           | -1.86225 | 0.034432 |
| BP | G0:00467 | protein autophosphorylation                        | 1.486681 | 0.034527 |
| BP | G0:00307 | ovulation                                          | 1.866163 | 0.03463  |
| BP | G0:00066 | protein targeting to mitochondrion                 | -1.71115 | 0.034661 |
| MF | G0:00168 | lyase activity                                     | -1.50868 | 0.034735 |
| BP | G0:00508 | positive regulation of antigen receptor-mediated s | -1.85908 | 0.034735 |
| MF | G0:00512 | NAD binding                                        | -1.73726 | 0.034735 |
| BP | G0:00313 | positive regulation of protein ubiquitination      | 1.6581   | 0.034739 |
| MF | G0:00045 | endonuclease activity                              | -1.6297  | 0.034966 |
| BP | G0:00421 | heme metabolic process                             | -1.83026 | 0.034966 |
| BP | G0:00329 | regulation of actin filament-based process         | 1.449674 | 0.035147 |
| BP | G0:00725 | pyrimidine-containing compound metabolic process   | -1.68987 | 0.035188 |
| BP | G0:00109 | negative regulation of protein processing          | 1.854784 | 0.035188 |
| BP | G0:19033 | negative regulation of protein maturation          | 1.854784 | 0.035188 |
| BP | G0:00704 | nucleotide-binding oligomerization domain contain  | 1.838479 | 0.035245 |
| MF | G0:00037 | transcription coactivator activity                 | 1.486472 | 0.035399 |
| CC | G0:00426 | MHC class II protein complex                       | -1.92684 | 0.035637 |
| BP | G0:00004 | maturacion of 5.8S rRNA                            | -1.86722 | 0.035752 |
| BP | G0:00316 | response to nutrient levels                        | 1.378099 | 0.035752 |
| CC | G0:00009 | spindle pole                                       | 1.5834   | 0.035752 |
| BP | G0:19027 | regulation of lamellipodium organization           | 1.781551 | 0.035752 |
| BP | G0:00316 | cellular response to nutrient levels               | 1.529953 | 0.035761 |
| CC | G0:00306 | multimeric ribonuclease P complex                  | -1.91068 | 0.036191 |
| MF | G0:00332 | ribonuclease P RNA binding                         | -1.91068 | 0.036191 |
| MF | G0:00166 | oxidoreductase activity, acting on the CH-CH group | -1.72217 | 0.03633  |
| BP | G0:00063 | DNA recombination                                  | -1.48449 | 0.036443 |
| CC | G0:00985 | intrinsic component of mitochondrial membrane      | -1.73567 | 0.036739 |
| BP | G0:00709 | protein localization to endoplasmic reticulum      | 1.737371 | 0.036836 |
| BP | G0:20001 | positive regulation of cell motility               | 1.378245 | 0.037112 |
| BP | G0:00159 | energy derivation by oxidation of organic compound | -1.45033 | 0.037112 |
| BP | G0:00335 | fatty acid beta-oxidation using acyl-CoA dehydroge | -1.90782 | 0.037112 |
| MF | G0:00616 | RNA polymerase II-specific DNA-binding transcript  | 1.449888 | 0.03713  |
| BP | G0:00019 | negative regulation of protein phosphorylation     | 1.411271 | 0.037233 |
| BP | G0:00987 | macromolecule deacylation                          | 1.636549 | 0.037497 |
| CC | G0:00717 | endoplasmic reticulum tubular network              | 1.836755 | 0.037749 |
| BP | G0:00431 | proteasome-mediated ubiquitin-dependent protein ca | 1.422319 | 0.037749 |
| BP | G0:00316 | regulation of protein stability                    | 1.416511 | 0.037786 |
| BP | G0:00098 | positive regulation of catabolic process           | 1.38557  | 0.037786 |
| MF | G0:00168 | hydro-lyase activity                               | -1.71802 | 0.037786 |
| BP | G0:00064 | protein deacetylation                              | 1.655682 | 0.03801  |
| MF | G0:00046 | protein kinase activity                            | 1.343259 | 0.038768 |
| BP | G0:00067 | porphyrin-containing compound metabolic process    | -1.75624 | 0.038768 |
| BP | G0:00032 | atrial septum development                          | 1.826084 | 0.038773 |
| CC | G0:19053 | peptidase complex                                  | -1.60541 | 0.039092 |
| CC | G0:00002 | nuclear chromosome                                 | -1.45388 | 0.039092 |
| BP | G0:00713 | cellular response to estrogen stimulus             | 1.852074 | 0.039426 |
| BP | G0:20001 | regulation of establishment of cell polarity       | 1.802098 | 0.039475 |
| BP | G0:00436 | regulation of transcription from RNA polymerase I  | 1.804464 | 0.039566 |
| BP | G0:00508 | regulation of T cell activation                    | -1.42012 | 0.039566 |
| BP | G0:00381 | ERBB signaling pathway                             | 1.583197 | 0.039679 |

|    |                                                              |                   |
|----|--------------------------------------------------------------|-------------------|
| CC | G0:00312:cell leading edge                                   | 1.40324 0.039777  |
| BP | G0:00092:pyrimidine ribonucleoside triphosphate metabolic p  | -1.92206 0.039985 |
| BP | G0:00432:regulation of protein-containing complex assembly   | 1.418116 0.040321 |
| BP | G0:00091:nucleoside triphosphate metabolic process           | -1.68704 0.04043  |
| CC | G0:00347:(methyltransferase complex                          | -1.65286 0.040613 |
| BP | G0:00300:actin filament polymerization                       | 1.483037 0.040849 |
| MF | G0:00171:SH3 domain binding                                  | 1.592147 0.040849 |
| BP | G0:00717:endoplasmic reticulum tubular network organization  | 1.789342 0.042517 |
| BP | G0:00069:phagocytosis                                        | 1.437795 0.042651 |
| BP | G0:00096:response to fungus                                  | 1.71783 0.042743  |
| BP | G0:00072:female gamete generation                            | 1.580681 0.043043 |
| BP | G0:00421:cellular response to glucose starvation             | 1.772465 0.043269 |
| BP | G0:00068:exocytosis                                          | 1.414076 0.043318 |
| BP | G0:19018:regulation of cell junction assembly                | 1.493458 0.043487 |
| BP | G0:19013:organic cyclic compound catabolic process           | -1.3631 0.043706  |
| MF | G0:00510:GTPase binding                                      | 1.429274 0.043724 |
| BP | G0:00435:positive regulation of GTPase activity              | 1.479268 0.044599 |
| BP | G0:00224:cellular process involved in reproduction in mult   | 1.408957 0.044925 |
| MF | G0:00042:threonine-type endopeptidase activity               | -1.92477 0.044925 |
| BP | G0:00481:Golgi vesicle transport                             | 1.448763 0.045135 |
| BP | G0:00421:T cell activation                                   | -1.30305 0.045264 |
| BP | G0:00450:transcytosis                                        | 1.802737 0.045264 |
| BP | G0:20002:regulation of fibroblast apoptotic process          | 1.821498 0.045264 |
| CC | G0:00319:early endosome membrane                             | 1.523926 0.045264 |
| MF | G0:00044:(histone acetyltransferase activity                 | 1.794891 0.045264 |
| BP | G0:00181:(peptidyl-serine phosphorylation                    | 1.431938 0.045264 |
| BP | G0:00071:(establishment or maintenance of cell polarity      | 1.488256 0.045264 |
| BP | G0:00064:protein folding                                     | -1.48969 0.045264 |
| MF | G0:00192:(phosphatase regulator activity                     | 1.657818 0.045264 |
| CC | G0:00057:RNA polymerase I complex                            | -1.88139 0.045915 |
| MF | G0:19019:phosphatidylinositol phosphate binding              | 1.553799 0.046805 |
| BP | G0:00442:cellular polysaccharide catabolic process           | 1.77309 0.04706   |
| MF | G0:00045:ribonuclease P activity                             | -1.95523 0.047068 |
| BP | G0:00360:(positive regulation of transcription from RNA poly | 1.831676 0.047068 |
| BP | G0:00091:purine nucleoside triphosphate biosynthetic proces  | -1.72577 0.047253 |
| MF | G0:00167:transferase activity, transferring one-carbon grou  | -1.53686 0.047279 |
| BP | G0:19027:positive regulation of lamellipodium organization   | 1.778417 0.048004 |
| CC | G0:00226:cytosolic large ribosomal subunit                   | -1.69691 0.048443 |
| BP | G0:00016:temperature homeostasis                             | 1.479308 0.048922 |
| BP | G0:00170:regulation of transforming growth factor beta rece  | 1.565874 0.049263 |
| BP | G0:00901:(negative regulation of transmembrane receptor pro  | 1.56455 0.049263  |
| BP | G0:00421:macrophage activation                               | 1.611943 0.049263 |
| MF | G0:00312:(small GTPase binding                               | 1.464549 0.049263 |
| BP | G0:00308:regulation of actin filament length                 | 1.503006 0.049263 |
| BP | G0:00067:porphyrin-containing compound biosynthetic proces   | -1.82548 0.049263 |
| BP | G0:00330:tetrapyrrole biosynthetic process                   | -1.82548 0.049263 |
| BP | G0:00433:neutrophil degranulation                            | 1.790979 0.049263 |
| BP | G0:00400:negative regulation of multicellular organism grov  | -1.87571 0.049497 |
| BP | G0:00070:(inner mitochondrial membrane organization          | -1.81961 0.049729 |

| ID       | Description                                       | NES      | p. adjust |
|----------|---------------------------------------------------|----------|-----------|
| hsa03010 | Ribosome                                          | -2.58096 | 3.33E-08  |
| hsa01200 | Carbon metabolism                                 | -2.26547 | 4.78E-06  |
| hsa01230 | Biosynthesis of amino acids                       | -2.26078 | 7.05E-05  |
| hsa03008 | Ribosome biogenesis in eukaryotes                 | -2.21325 | 0.00033   |
| hsa04144 | Endocytosis                                       | 1.786221 | 0.00033   |
| hsa04140 | Autophagy - animal                                | 1.930503 | 0.000468  |
| hsa05012 | Parkinson disease                                 | -1.68106 | 0.000831  |
| hsa05131 | Shigellosis                                       | 1.741645 | 0.000867  |
| hsa05332 | Graft-versus-host disease                         | -2.15052 | 0.001145  |
| hsa01232 | Nucleotide metabolism                             | -1.95875 | 0.002701  |
| hsa05020 | Prion disease                                     | -1.68485 | 0.002701  |
| hsa05330 | Allograft rejection                               | -2.06344 | 0.003051  |
| hsa00020 | Citrate cycle (TCA cycle)                         | -2.07694 | 0.003363  |
| hsa05168 | Herpes simplex virus 1 infection                  | 1.495545 | 0.003961  |
| hsa03410 | Base excision repair                              | -2.05862 | 0.004666  |
| hsa05320 | Autoimmune thyroid disease                        | -1.89547 | 0.007442  |
| hsa03030 | DNA replication                                   | -1.99252 | 0.007442  |
| hsa05016 | Huntington disease                                | -1.54125 | 0.008341  |
| hsa04062 | Chemokine signaling pathway                       | 1.607407 | 0.008681  |
| hsa05416 | Viral myocarditis                                 | -1.89999 | 0.00945   |
| hsa05135 | Yersinia infection                                | 1.671975 | 0.011826  |
| hsa05415 | Diabetic cardiomyopathy                           | -1.56896 | 0.01199   |
| hsa00230 | Purine metabolism                                 | -1.66124 | 0.012189  |
| hsa00270 | Cysteine and methionine metabolism                | -1.84265 | 0.012727  |
| hsa01210 | 2-Oxocarboxylic acid metabolism                   | -1.99738 | 0.012733  |
| hsa04940 | Type I diabetes mellitus                          | -1.83341 | 0.012733  |
| hsa05022 | Pathways of neurodegeneration - multiple diseases | -1.40254 | 0.012733  |
| hsa03050 | Proteasome                                        | -1.81513 | 0.013866  |
| hsa05208 | Chemical carcinogenesis - reactive oxygen species | -1.53197 | 0.015204  |
| hsa05322 | Systemic lupus erythematosus                      | -1.81847 | 0.015873  |
| hsa05017 | Spinocerebellar ataxia                            | -1.63425 | 0.020228  |
| hsa00280 | Valine, leucine and isoleucine degradation        | -1.77329 | 0.021375  |
| hsa00630 | Glyoxylate and dicarboxylate metabolism           | -1.85894 | 0.021375  |
| hsa04068 | FoxO signaling pathway                            | 1.620969 | 0.022948  |
| hsa05014 | Amyotrophic lateral sclerosis                     | -1.42823 | 0.022948  |
| hsa05010 | Alzheimer disease                                 | -1.40186 | 0.025876  |
| hsa00620 | Pyruvate metabolism                               | -1.74585 | 0.026025  |
| hsa05130 | Pathogenic Escherichia coli infection             | 1.516687 | 0.0281    |
| hsa04071 | Sphingolipid signaling pathway                    | 1.604535 | 0.0281    |
| hsa04146 | Peroxisome                                        | -1.6795  | 0.0281    |
| hsa04115 | p53 signaling pathway                             | 1.717898 | 0.03219   |
| hsa05417 | Lipid and atherosclerosis                         | 1.433689 | 0.036012  |
| hsa05211 | Renal cell carcinoma                              | 1.679969 | 0.037057  |
| hsa04722 | Neurotrophin signaling pathway                    | 1.523264 | 0.037057  |
| hsa00240 | Pyrimidine metabolism                             | -1.668   | 0.037057  |
| hsa05340 | Primary immunodeficiency                          | -1.75021 | 0.037057  |
| hsa05212 | Pancreatic cancer                                 | 1.599671 | 0.037057  |
| hsa00512 | Mucin type O-glycan biosynthesis                  | 1.720685 | 0.037057  |
| hsa05132 | Salmonella infection                              | 1.424703 | 0.037057  |
| hsa00500 | Starch and sucrose metabolism                     | 1.731811 | 0.037057  |
| hsa00190 | Oxidative phosphorylation                         | -1.57761 | 0.037057  |
| hsa04666 | Fc gamma R-mediated phagocytosis                  | 1.584908 | 0.037057  |
| hsa01240 | Biosynthesis of cofactors                         | -1.50714 | 0.037069  |

|                                                       |          |          |
|-------------------------------------------------------|----------|----------|
| hsa04670 Leukocyte transendothelial migration         | 1.501504 | 0.044796 |
| hsa05310 Asthma                                       | -1.69375 | 0.044796 |
| hsa04371 Apelin signaling pathway                     | 1.491177 | 0.044955 |
| hsa05219 Bladder cancer                               | 1.657883 | 0.046049 |
| hsa04672 Intestinal immune network for IgA production | -1.67143 | 0.046715 |
| hsa04658 Th1 and Th2 cell differentiation             | -1.55356 | 0.048234 |
| hsa00562 Inositol phosphate metabolism                | 1.589676 | 0.048234 |



**Supplementary Table 4: Expression levels of 6 genes in normal individuals**

|         | N1        | N2        | N3        | N4        | N5        | N6        |
|---------|-----------|-----------|-----------|-----------|-----------|-----------|
| CEBPG   | 0.2197154 | 0.1814453 | 0.0652913 | 0.1308191 | 0.3354173 | 0.1991273 |
| MMP9    | 0.0026999 | 0.1027926 | 0.0119546 | 0.0202802 | 0.0006621 | 0.0026981 |
| MXD4    | 0.0002014 | 0.0124918 | 0.0032213 | 0.0206336 | 3.61E-05  | 0.0003437 |
| S100A12 | 0.0345667 | 0.0266974 | 0.0186975 | 0.0128603 | 0.1645962 | 0.0208235 |
| SSRP1   | 0.0002737 | 0.0233752 | 0.0041028 | 0.0073091 | 0.0003251 | 0.0010722 |
| TGFBR3  | 0.8586736 | 0.1166811 | 0.3253476 | 0.5987996 | 0.3152353 | 0.1030494 |

**Supplementary Table 5: Expression levels of 6 genes in patients**

|         | P1        | P2        | P3        | P4        | P5        | P6        |
|---------|-----------|-----------|-----------|-----------|-----------|-----------|
| CEBPG   | 0.1824038 | 0.2070555 | 0.1723662 | 0.0585383 | 0.2615602 | 0.1110688 |
| MMP9    | 0.0196277 | 0.0054404 | 0.0003724 | 0.0116457 | 0.0110277 | 0.0055652 |
| MXD4    | 0.0001288 | 0.0001334 | 8.96E-05  | 9.07E-05  | 0.0105758 | 0.0062842 |
| S100A12 | 0.0615544 | 2.7322115 | 0.3654616 | 2.6586867 | 0.0617808 | 1.6952964 |
| SSRP1   | 1.76E-05  | 6.69E-05  | 0.0005355 | 0.0009582 | 0.0018216 | 0.001718  |
| TGFBR3  | 0.2843132 | 0.0821123 | 0.0823897 | 0.1027926 | 0.0719451 | 0.1907818 |
